# Supplementary material for: Total biosynthesis of fungal tetraketide pyrones
Source: Royal Society of Chemistry journal article supplement (doi:10.1039/d3cc04758j), 2023-01-01
Supplement: d3cc04758j1.pdf [file d3cc04758j1.pdf]

## Total Biosynthesis of Fungal Tetraketide Pyrones

Yunlong Sun,<sup>a</sup> Dongsong Tian,<sup>a</sup> Eric Kuhnert,<sup>a</sup> Geraldine Le Goff,<sup>b</sup> Guillaume Arcile,<sup>b</sup> Jamal Ouazzani,<sup>b</sup>  
and Russell J. Cox<sup>\*a</sup>

### Electronic Supplementary Information

- a. Institute for Organic Chemistry, Leibniz Universität Hannover, Hannover, Germany
- b. ICSN, CNRS, Gif Sur Yvette, France.

# Table of Contents

|                                                            |    |
|------------------------------------------------------------|----|
| <b>1. Experimental Procedures</b> .....                    | 3  |
| 1.1 Bioinformatic Analyses .....                           | 3  |
| 1.1.1 Transcriptome Sequencing and Data Analysis.....      | 3  |
| 1.1.2 Identification of <i>mfn</i> BGC .....               | 3  |
| 1.1.3 Intron Analysis of <i>mfn</i> BGC.....               | 6  |
| 1.1.4 Analysis of <i>ila</i> BGC .....                     | 11 |
| 1.1.5 Sequence Analysis of MfnPKS2 KS domain .....         | 12 |
| 1.2 DNA Cloning.....                                       | 13 |
| 1.3 Yeast Recombination .....                              | 13 |
| 1.4 Construction of Plasmids.....                          | 14 |
| 1.5 Transformation and Selection of <i>A. oryzae</i> ..... | 21 |
| 1.6 Fermentation and Analysis of Compounds.....            | 23 |
| 1.6.1 Presence of 6 in experiment 1 .....                  | 24 |
| <b>2. Compound Characterization</b> .....                  | 25 |
| Compound 5 .....                                           | 25 |
| Compound 6 .....                                           | 30 |
| Compound 7 .....                                           | 35 |
| Compound 8 .....                                           | 40 |
| Compound 9 .....                                           | 45 |
| Compound 10 .....                                          | 50 |
| Compound 11 .....                                          | 55 |
| Compound 1I .....                                          | 60 |
| Compound 1H.....                                           | 65 |
| Compound 12 .....                                          | 70 |
| Compound 13 .....                                          | 75 |
| Compound 14 .....                                          | 80 |
| Compound 15 .....                                          | 85 |
| Compound 16 .....                                          | 90 |
| <b>3. Reference</b> .....                                  | 95 |

# 1. Experimental Procedures

## 1.1 Bioinformatic Analyses

### 1.1.1 Transcriptome Sequencing and Data Analysis

In this study, the transcriptome data had a dual purpose. Firstly, it helped assess the levels of functional gene expression by comparing conditions of production and non-production. This analysis aided in identifying boundaries of the mitoforin H biosynthetic gene cluster (*mfnBGC*). Moreover, the transcriptome data facilitated the identification of intron positions. The processed RNASeq data was incorporated into Geneious and aligned with a reference dataset. During alignment, instances where reads spanned intron regions were divided strategically, assisting in accurately pinpointing intron positions. In conjunction with intron predictions from tools like antiSMASH<sup>[1]</sup> and FGENESH<sup>[2]</sup>, DNA fragments lacking introns were cloned. These fragments had 50-bp overlaps and were later combined through yeast-mediated recombination methods for plasmid construction.

*H. monticulosa* MUCL 54604 underwent cultivation in both producing conditions (PDB medium) and non-producing conditions (DPY medium). Following cultivation, mycelia were harvested and employed for the extraction of total RNA utilizing the Quick-RNA Fungal/Bacterial Miniprep Kit (Zymo Research). Subsequent to extraction, the RNA samples underwent DNase I treatment (Zymo Research). The generation of cDNA was achieved by employing the High Capacity RNA-to-cDNA™ kit (Thermo Fisher Scientific). To ascertain the absence of genomic DNA contamination in the extracted RNA, a PCR targeting a housekeeping gene was performed.

Three sets of high-quality RNA samples, verified to be free from genomic DNA contamination, were prepared for each experimental condition. These prepared RNA samples were subsequently forwarded to CeBiTec for cDNA sequencing after the reverse transcription procedure was successfully conducted. For library construction, RNA was employed in conjunction with the TruSeq mRNA Sample Preparation Kit (stranded, Illumina). The sequencing of the resulting cDNA libraries was performed on the Illumina HiSeq 1500 platform using the 'Rapid Mode,' with a read configuration of 2 x 75 bp. The subsequent stages of data analysis and base calling were executed using proprietary in-house software.

### 1.1.2 Identification of *mfnBGC*

The genomic sequences of *H. monticulosa*, *H. submonticulosa*, and *H. spongiphila* were utilized to establish a local database within the Geneious software. This local database was then employed for the manual BLASTp analysis of candidate *mfnBGC*. To serve as a template, the solanapyrone synthase<sup>[3]</sup> (D7UQ44) associated with solanapyrone biosynthesis was chosen due to its involvement in the  $\alpha$ -pyrone backbone. This process resulted in the identification of three clusters exhibiting substantial similarities for each fungus. Utilizing the online BLASTp, genes encompassed within an extended gene cluster were searched for and manually annotated (Table S1.1). This extensive cluster was found to encode a diverse array of enzymes including DNA ligase (*mfnL9*), epimerase (*mfnL8*), transcriptional regulator (*mfnL7*, *mfnR1*), SDRs (*mfnL6*, *mfnR4*), DNA polymerase (*mfnL5*), hydrolase (*mfnL4*), hrPKS (*mfnPKS2*, *mfnPKS1*), O-acetyltransferase (*mfnL3*), P450s (*mfnL2*, *mfnR3*), FMO (*mfnR2*), O-methyltransferase (*mfnL1*) and membrane protein (*mfnR6*).

To refine the BGC arrangement, transcriptome data was employed to adjust the borders of the cluster. The analysis was to elucidate the expression patterns of functional genes within the *mfnBGC* while simultaneously delineating its boundaries by the transcriptome data from *H. monticulosa*. The findings

also unveiled a distinct expression pattern within the *mfn*BGC. Specifically, genes from *mfnPKS2* to *mfnR4* (blue area) exhibited significant upregulation under conditions conducive to production (Table 1.1, Figure 1.1). In contrast, genes located beyond this defined region exhibited either downregulation or remained unexpressed altogether.

*MfnPKS1* was expressed and produced tetraketide pyrone **5**. Our focus then shifted to *Penicillium islandicum*'s genome, the producer of islandic acid <sup>[4]</sup>, where we used the *mfn* genes as a reference. While *ilaPKS1* and most tailoring genes have similarities to the *mfn* genes, *ilaPKS2* showed no similarity to *mfnPKS2*. Subsequently, a thorough comparison was performed, encompassing the *sol* BGC, *mfn* BGCs from the three *Hypomontagnella* organisms, *ila*BGC, and *amp*BGC. This analysis was visualized through a cluster map showcasing all six gene clusters <sup>[5]</sup> (Figure S1.2).

**Table S1.1** Proposed functions of genes of multiferisin H BGC (blue area) from *H. monticulosa* MUCL 54604. Average expression levels from conditions of production (A) and non-production (B) to calculate the log<sub>2</sub>-fold change (B/A).

| Gene           | Locus_tag | AA   | Putative Function         | Predicted Cofactor | A non-producing | B producing | Log <sub>2</sub> -fold change B/A |
|----------------|-----------|------|---------------------------|--------------------|-----------------|-------------|-----------------------------------|
| <i>mfnL9</i>   | 3645      | 906  | DNA ligase                |                    | -               | -           | -                                 |
| <i>mfnL8</i>   | 3646      | 343  | Epimerase                 |                    | 462.24          | 286.16      | -0.69                             |
| <i>mfnL7</i>   | 3647      | 364  | Transcriptional regulator |                    | 32.13           | 26.61       | -0.27                             |
| <i>mfnL6</i>   | 3648      | 186  | SDR                       | NAD(P)             | -               | -           | -                                 |
| <i>mfnL5</i>   | 3649      | 2248 | DNA polymerase            |                    | -               | -           | -                                 |
| <i>mfnL4</i>   | 3650      | 163  | Hydrolase                 |                    | 1.04            | 0.40        | -1.39                             |
| <i>mfnPKS2</i> | 3651      | 2504 | hrPKS                     | NAD(P)             | 101.57          | 290.21      | 1.51                              |
| <i>mfnL3</i>   | 3652      | 487  | O-acetyltransferase       |                    | -               | -           | -                                 |
| <i>mfnL2</i>   | 3653      | 537  | P450                      |                    | 100.53          | 147.30      | 0.55                              |
| <i>mfnL1</i>   | 3654      | 427  | O-methyltransferase       | SAM                | 169.97          | 307.35      | 0.85                              |
| <i>mfnPKS1</i> | 3655      | 2591 | hrPKS                     | NAD(P)             | 60.11           | 86.35       | 0.52                              |
| <i>mfnR1</i>   | 3656      | 654  | Transcriptional regulator |                    | -               | -           | -                                 |
| <i>mfnR2</i>   | 3657      | 526  | FMO                       | FAD                | 203.14          | 703.65      | 1.79                              |
| <i>mfnR3</i>   | 3658      | 580  | P450                      |                    | 23.84           | 50.29       | 1.08                              |
| <i>mfnR4</i>   | 3659      | 274  | SDR                       | NAD(P)             | 386.59          | 529.38      | 0.45                              |
| <i>mfnR5</i>   | 3660      | 279  | Unknown                   |                    | -               | -           | -                                 |
| <i>mfnR6</i>   | 3661      | 333  | membrane protein          |                    | 9.33            | 9.33        | -0.72                             |

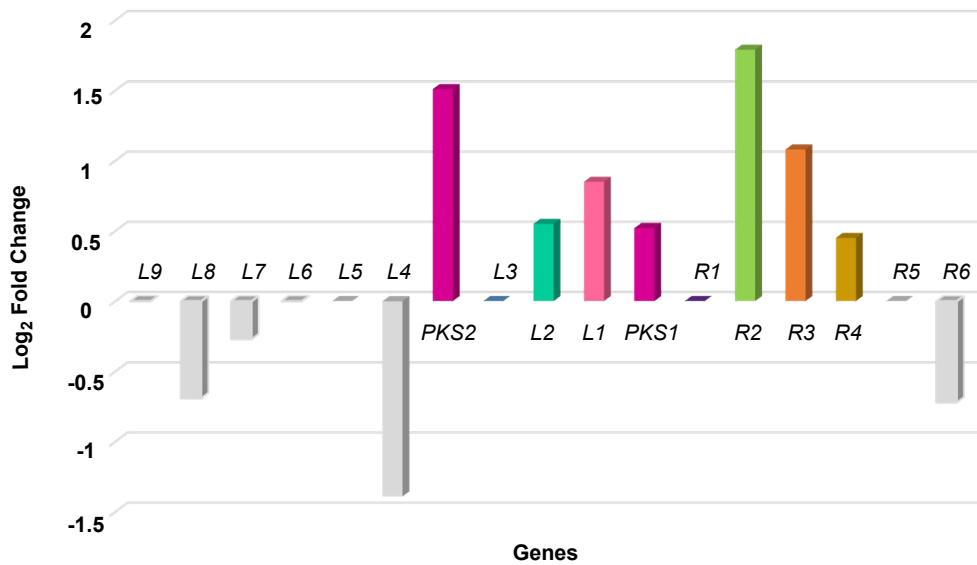

**Figure S1.1** Bar chart of Log<sub>2</sub>-fold changes represents the expression level of the predicted multiforin H BGC from *H. monticulosa* MUCL 54604 transcriptome data. The genes from proposed BGC are coloured as shown in table 1.1.

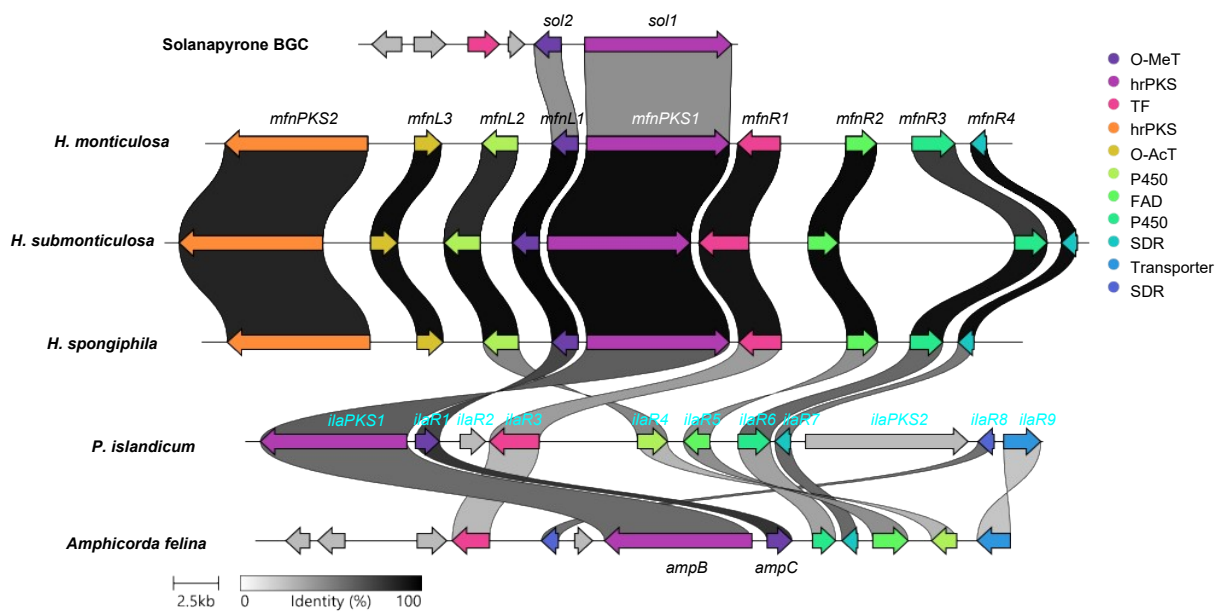

**Figure S1.2** BGC alignment of *sol* BGC, *mfn* BGCs from the three *Hypomontagnella* organisms, *ila*BGC, and *amp*BGC by Clinker.<sup>[5]</sup>

### 1.1.3 Intron Analysis of *mfnBGC*

The processed RNASeq data was integrated into Geneious and aligned with the *mfnBGC* reference. By examining the RNA reads, we could accurately determine intron positions given the condition of having sufficiently high read quality. For instance, in the case of *mfnL1*, *mfnL2*, *mfnR4*, and *mfnR2*, *mfnL3* (Figure S1.3, S1.4, S1.5, S1.6, S1.7), the high-quality reads allowed us to precisely identify intron positions.

However, for *mfnPKS1*, *mfnPKS2*, and *mfnR3* (Figure S1.8, S1.9, S1.10), while some reads aided in intron localization, prediction tools (antiSMASH <sup>[1]</sup> and FGENESH <sup>[2]</sup>) were necessary for confirming intron positions in certain segments.

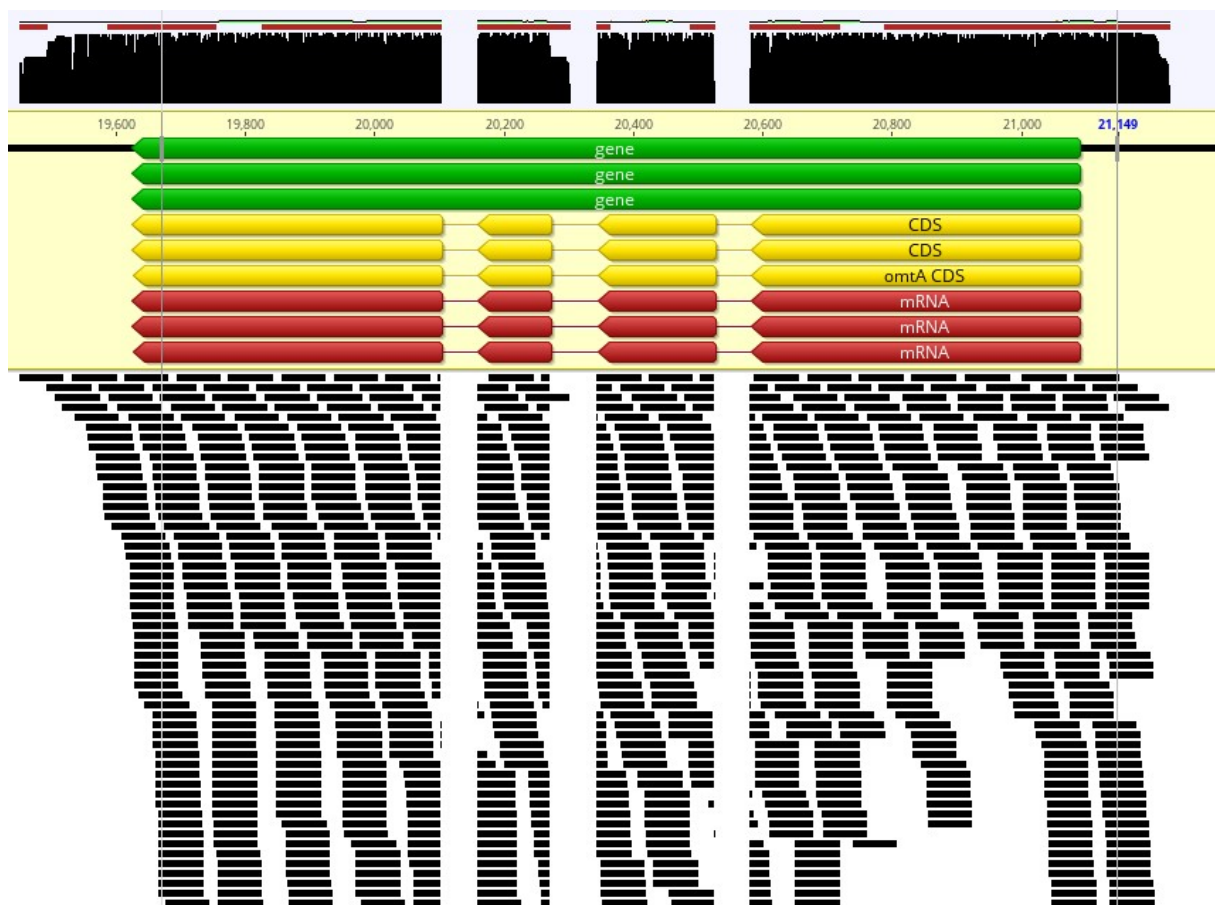

**Figure S1.3** The RNASeq mapping of *mfnL1*. The gaps represent the intron positions. Black vertical bars represent the mapped reads

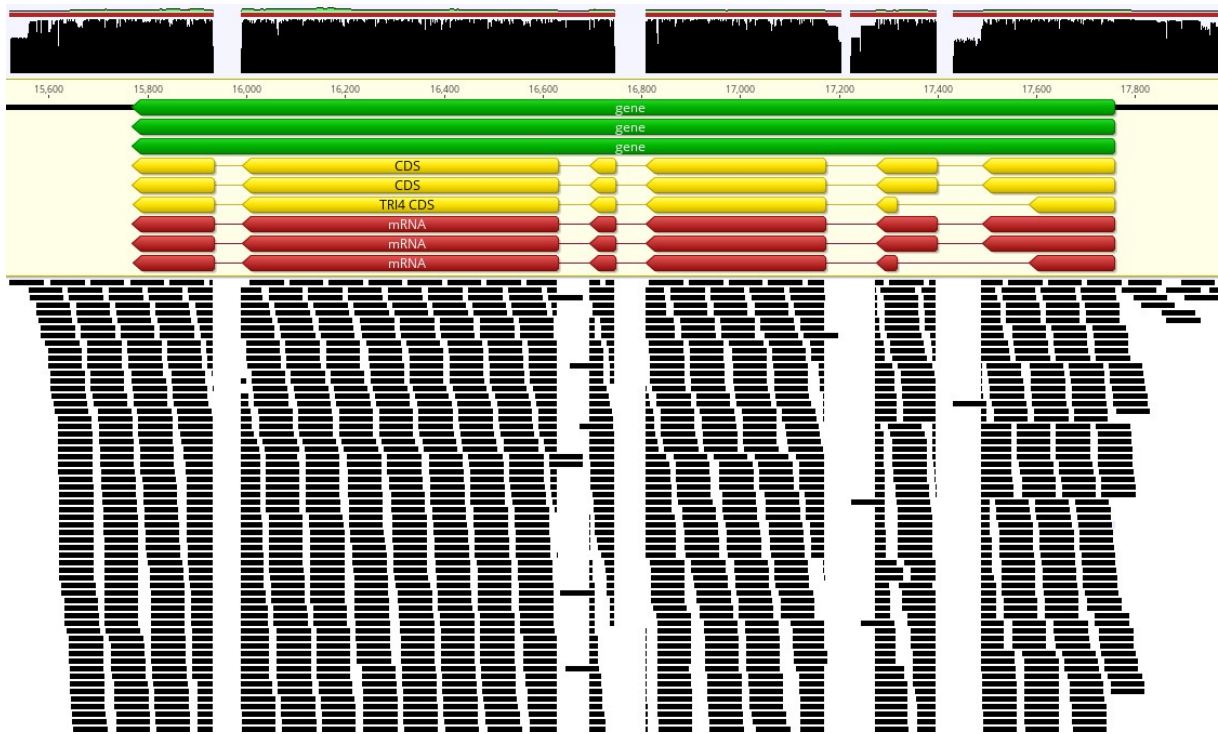

**Figure S1.4** The RNaseq mapping of *mfnL2*. The gaps represent the intron positions. Black vertical bars represent the mapped reads

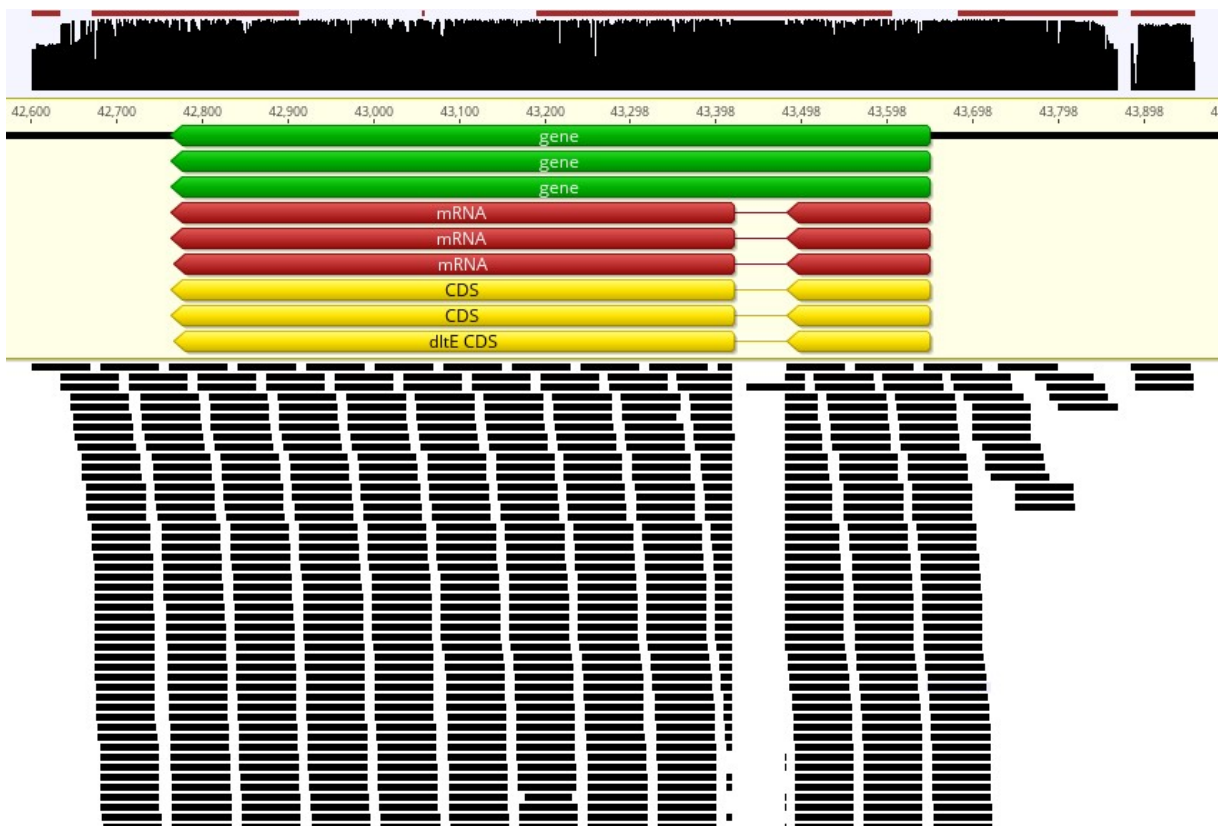

**Figure S1.5** The RNaseq mapping of *mfnR4*. The gaps represent the intron positions. Black vertical bars represent the mapped reads

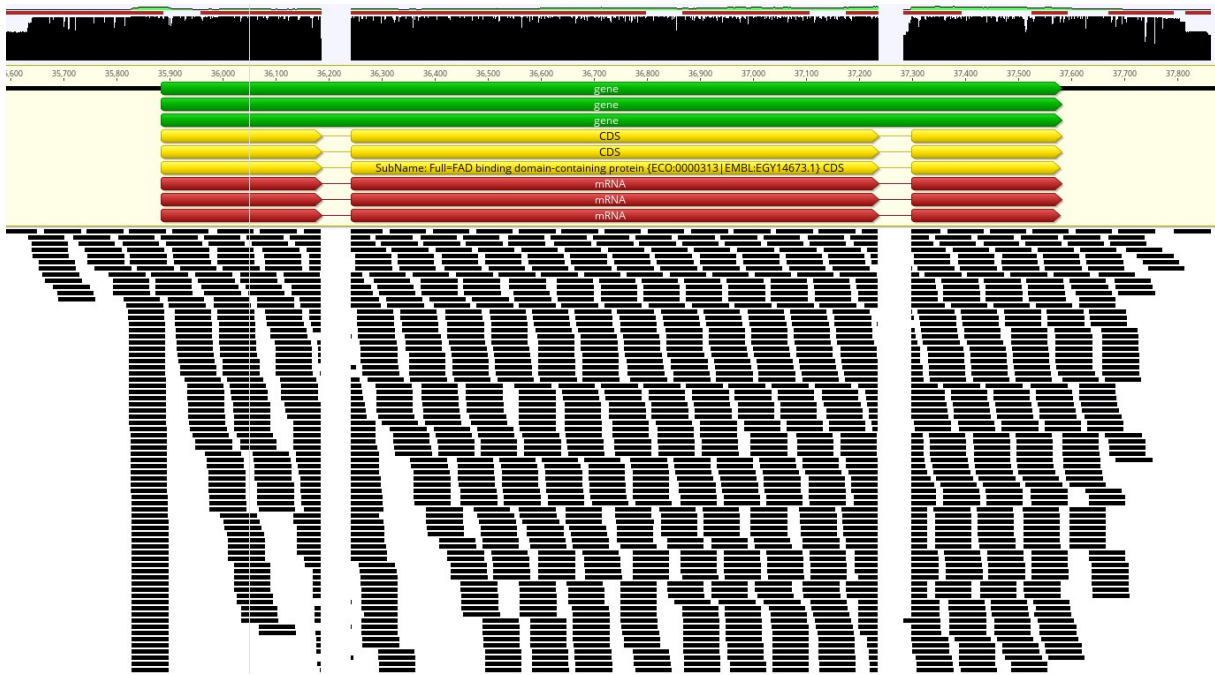

**Figure S1.6** The RNaseq mapping of *mfnR2*. The gaps represent the intron positions. Black vertical bars represent the mapped reads

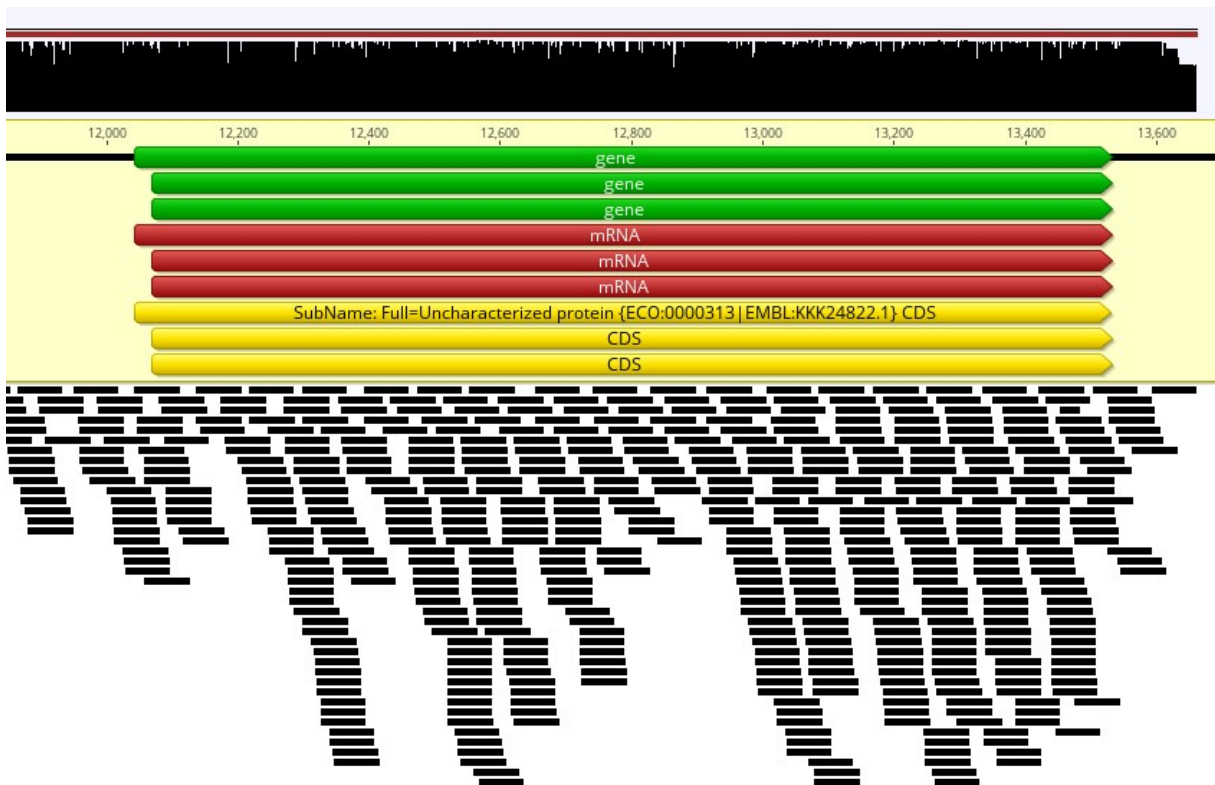

**Figure S1.7** The RNaseq mapping of *mfnL3*. Black vertical bars represent the mapped reads.



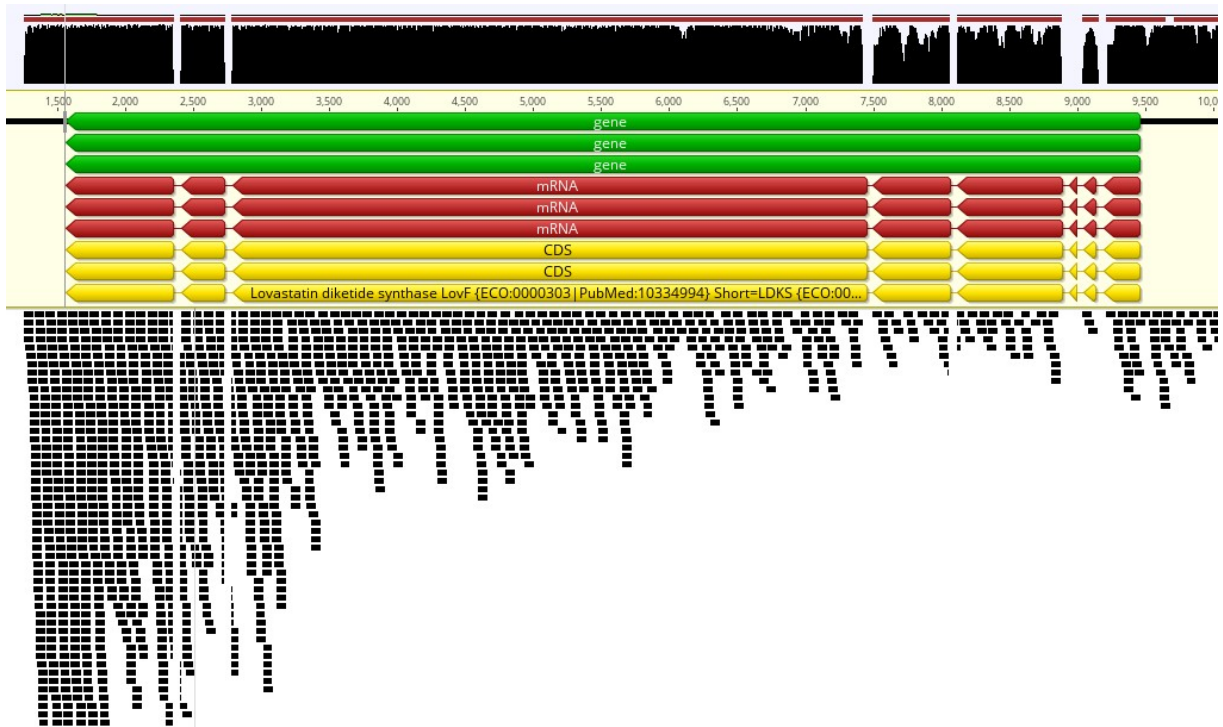

**Figure S1.8** The RNaseq mapping of *mfnPKS2*. The gaps represent the intron positions. Black vertical bars represent the mapped reads

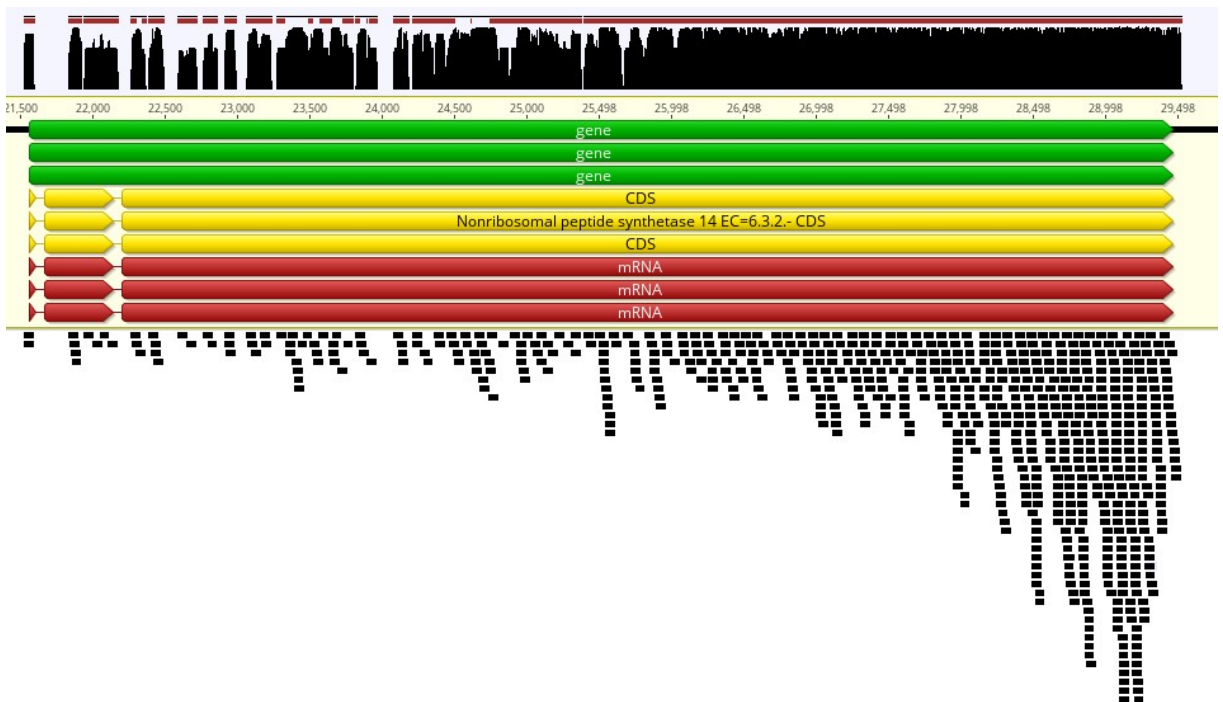

**Figure S1.9** The RNaseq mapping of *mfnPKS1*. The gaps represent the intron positions. Black vertical bars represent the mapped reads

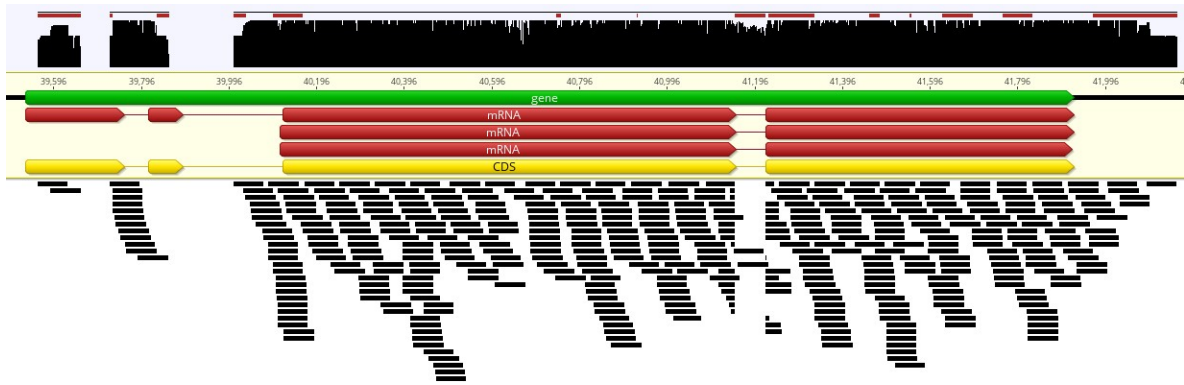

Fi

**Figure S1.10** The RNaseq mapping of *mfnR3*. The gaps represent the intron positions. Black vertical bars represent the mapped reads

### 1.1.4 Analysis of *ilaBGC*

Before embarking on the experimental procedures, an in-depth analysis of the potential functions inherent in this gene cluster was undertaken (Table S1.2). The scrutiny identified a range of probable functions within the cluster, encompassing two hrPKS (*IlaPKS1*, *IlaPKS2*), two P450 (*IlaR4* and *IlaR6*) two SDRs (*IlaR7* and *IlaR8*), along with an O-MeT (*IlaR1*), an O-AcT (*IlaR2*), a FMO (*IlaR5*), a transcription factor (*IlaR3*), and a transporter (*IlaR9*). The domain analysis of *ilaPKS2* was performed on NCBI, a choline/carnitine o-acyltransferase was found after the ACP [6] (Figure S1.11).

The genes *ilaPKS2*, *ilaR2*, and *ilaR8* were cloned from the genomic DNA of a *Penicillium islandicum* strain iBT20602, generously provided by Professor Thomas Ostenfeld Larsen from the Danish Technical University. Following the extraction, all DNA inserts were subjected to sequencing, revealing a complete correspondence with the respective sequences found in *Talaromyces islandicus* WF-38-12 [7](ATCC 26535), which is recognized as the source organism for producing islandic acid [4].

**Table S1.2** Proposed functions of *ilaBGC*

| Gene           | Locus_tag (PISL3812_) | AA   | Protein BLAST                                           | Putative Function | Predicted cofactor | Best hit accession |
|----------------|-----------------------|------|---------------------------------------------------------|-------------------|--------------------|--------------------|
| <i>IlaPKS1</i> | 09789                 | 2630 | Prosolanapyrone synthase                                | hrPKS             | NAD(P), SAM        | D7UQ44             |
| <i>IlaR1</i>   | 09788                 | 427  | O-methyltransferase sol2                                | O-MeT             | SAM                | D7UQ43             |
| <i>IlaR2</i>   | 09787                 | 468  | Probable acetyltransferase tazD                         | O-AcT             |                    | Q0CS99             |
| <i>IlaR3</i>   | 09786                 | 649  | Probable transcription factor sol4                      | TF                |                    | D7UQ41             |
| <i>IlaR4</i>   | 09785                 | 473  | Cytochrome P450 monooxygenase tpcC                      | P450              |                    | M2UJ60             |
| <i>IlaR5</i>   | 09784                 | 466  | FAD-linked oxidoreductase anuG                          | FMO               | FAD                | W6QEKO             |
| <i>IlaR6</i>   | 09783                 | 581  | Cytochrome P450 monooxygenase TRI13                     | P450              |                    | Q9C1I4             |
| <i>IlaR7</i>   | 09782                 | 273  | Short-chain dehydrogenase/reductase family 32C member 1 | SDR               | NAD(P)             | Q0IH28             |
| <i>IlaPKS2</i> | 09781                 | 2972 | Highly reducing polyketide synthase SAT13               | hrPKS             | NAD(P), SAM        | A0A084API3         |
| <i>IlaR8</i>   | 09780                 | 249  | Short-chain dehydrogenase/reductase atnB                | SDR               | NAD(P)             | A0A455LLX2         |
| <i>IlaR9</i>   | 09779                 | 563  | MFS-type transporter calB                               | Transporter       |                    | A0A1V6PBC8         |

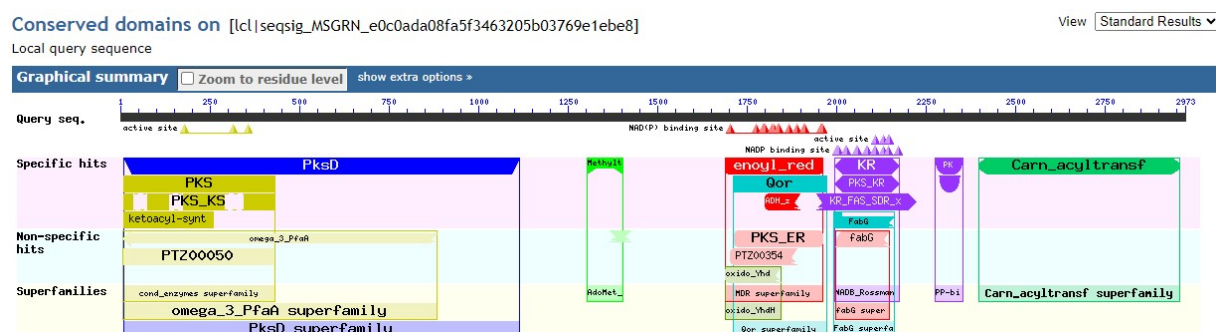

**Figure S1.11** Conserved domains analysis of *ilaPKS2*.

### 1.1.5 Sequence Analysis of MfnPKS2 KS domain

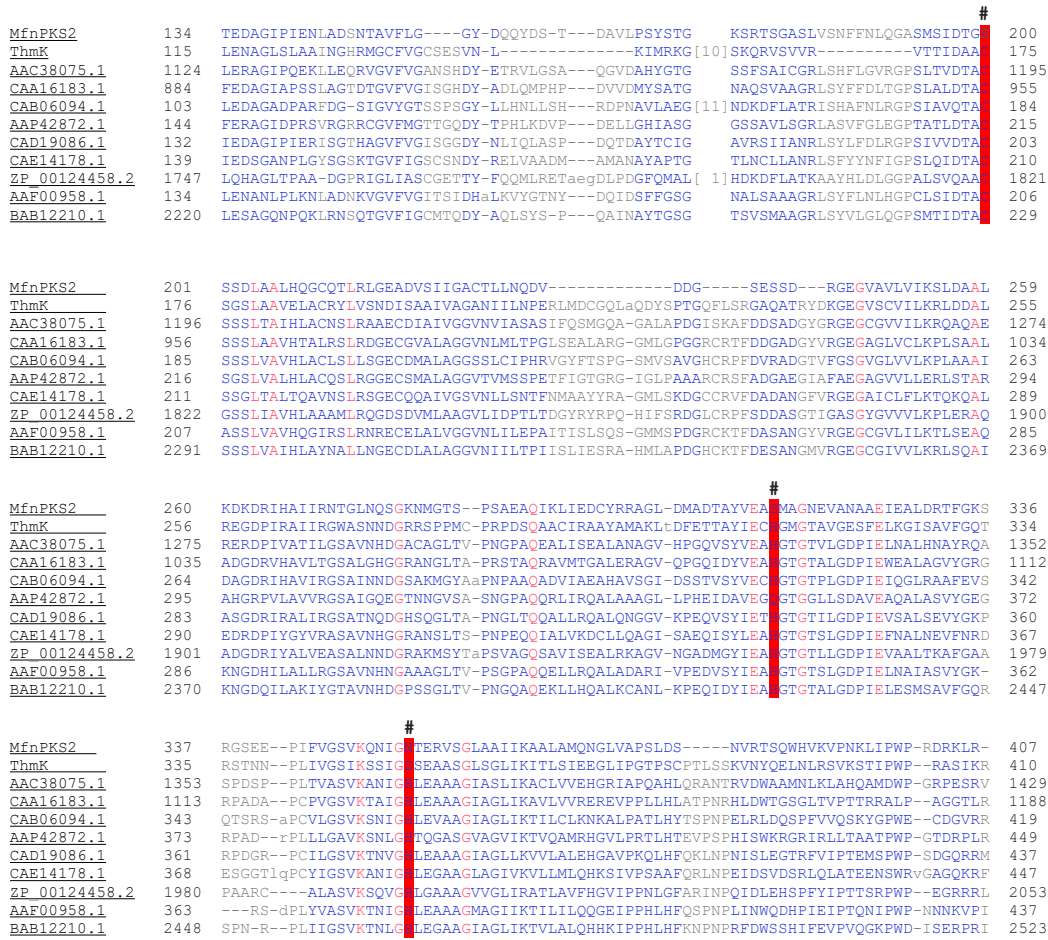

**Figure S 1.12.** Blastp multiple sequence alignment of the KS domain of mfnPKS2 with that of other PKS enzymes indicated that the amino acid residues in all three active sites were mutated.<sup>[8]</sup> # Active site in red.

**Table S1.3** Descriptions and the accessions of the candidate proteins for Figure S1.12

| Accession                               | Description                                                                                                    |
|-----------------------------------------|----------------------------------------------------------------------------------------------------------------|
| KAI0382397.1<br>(MfnPKS2)               | Hypothetical protein F5Y04DRAFT_45677 [ <i>Hypomontagnella monticulosa</i> ]                                   |
| XP_026611136.1<br>(ThmK) <sup>[8]</sup> | Hypothetical protein CDV56_101535 [ <i>Aspergillus thermomutatus</i> ]                                         |
| AAC38075.1                              | Polyketide synthase type I [ <i>Pseudomonas protegens</i> Pf-5]                                                |
| CAA16183.1                              | Polyketide synthase [ <i>Streptomyces coelicolor</i> A3(2)]                                                    |
| CAB06094.1                              | Phenolphthiocerol synthesis type-I polyketide synthase Ppse [ <i>Mycobacterium tuberculosis</i> H37Rv]         |
| AAP42872.1                              | NanA9 [ <i>Streptomyces nanchangensis</i> ]                                                                    |
| CAD19086.1                              | StiB protein [ <i>Stigmatella aurantiaca</i> Sg a15]                                                           |
| CAE14178.1                              | Unnamed protein product [ <i>Photorhabdus laumondii</i> subsp. laumondii T101]                                 |
| ZP_00124458.2                           | Non-ribosomal peptide synthetase and related proteins [ <i>Pseudomonas syringae</i> pv. <i>syringae</i> B728a] |
| AAF00958.1                              | McyE [ <i>Microcystis aeruginosa</i> PCC 7806]                                                                 |
| BAB12210.1                              | polyketide synthase [ <i>Microcystis aeruginosa</i> ]                                                          |

## 1.2 DNA Cloning

Oligonucleotides employed for PCR were designed using the Geneious software platform and subsequently synthesized by Sigma Genosys and Eurofins. The PCR investigations were orchestrated using the high-fidelity DNA polymerase, Q5<sup>®</sup> (New England Biolabs), for amplifying the DNA fragment destined for heterologous expression. In the context of colony PCR, the OneTaq<sup>®</sup> DNA polymerase was the enzyme of choice. The genomic DNA (gDNA) was procured from the pool of potential fungal candidates via the utilization of the GeneElute<sup>™</sup> Plant Genomic DNA Miniprep Kit (Sigma Life Science). The exonic DNA fragments constituting the multiforisin H biosynthetic gene cluster (BGC) were derived from the gDNA of *Hypomontagnella monticulosa* and subsequently joined to a coding sequence by yeast recombination. Likewise, the exonic DNA fragments characterizing the islandic acid BGC were cloned directly from the genomic DNA of *Penicillium islandicum* (also known as *Talaromyces islandicus*). Subsequently, these fragments were linked to a coding sequence using yeast recombination techniques.

Subsequent experiments employed four modified vectors (designated as pTYGs), each tailored with distinct selection markers ( $\Delta argB$ ,  $sC$ ,  $adeA$ ,  $niaD$ ) to facilitate targeted selection in *A. oryzae* NSAR1 [9,10]. These pTYGs vectors are equipped with the  $2\mu$  origin and the *colE1* gene, optimizing their replication within *Saccharomyces cerevisiae* and *E. coli*, respectively. Selection mechanisms were integrated, employing the auxotrophy *URA3* gene for selection in *Saccharomyces cerevisiae*, while the *carB* resistance gene conferred selection advantage in *E. coli*. Notably, the *ccdB* suicide gene was employed as an additional selection marker in *E. coli*. Each pTYGs vector boasts four distinct promoter and terminator combinations (P/TamyB, P/Tadh, P/TgpdA, and P/Teno). Moreover, all four of these plasmids can be specifically cleaved using *Ascl* between P/Tadh, P/TgpdA, and P/Teno. Furthermore, the P/TamyB region can be precisely cleaved using *NotI*, facilitating yeast recombination processes.

## 1.3 Yeast Recombination

Yeast cultivation was carried out on YPAD agar at 30 °C for three days. A singular colony was selected and incubated overnight within 10 mL of YPAD media, maintained at 30 °C with shaking at 200 rpm. Following this, the 10 mL YPAD culture was transferred to a 250 mL Erlenmeyer flask preloaded with 40 mL of fresh YPAD medium. This composite culture was then incubated at 30 °C while being continuously shaken at 200 rpm for an additional 4 hours.

Subsequent to this incubation, cell collection was executed by subjecting the culture medium to centrifugation at 3,000 g for five minutes. The resulting pellet was subjected to two cycles of rinsing with 25 mL of double-distilled H<sub>2</sub>O, followed by centrifugation after each rinse. This rinsed pellet was then suspended in a Falcon tube, with a total volume of 5 mL of Lithium acetate (LiOAc, 0.1 M). In a further step, aliquots of 50  $\mu$ L from this suspension were individually transferred into distinct 1.5 mL Eppendorf reaction tubes. For immediate utilization, each aliquot underwent rapid pelleting at 21,000 g for 15 seconds, with the resulting pellet being immediately employed for yeast transformation.

On the other hand, for long-term cell stocking, the initial LiOAc step was substituted with an FCC solution. The harvested pellet was suspended in 5 mL of the FCC solution, prior to being apportioned into 50  $\mu$ L aliquots, each of which was placed into separate 1.5 mL Eppendorf reaction tubes. These aliquots were then stored at -80 °C. For the purpose of thawing, samples were initially subjected to incubation on ice, followed by centrifugation for 15 seconds at

21,000 g. After the removal of the FCC solution, the cells were deemed ready for employment in the yeast transformation process.

The subsequent steps involved adding the following components to the pellet in a specific order: first, 50  $\mu$ L of ssDNA, followed by 36  $\mu$ L of 1 M LiOAc, and then 34  $\mu$ L of a DNA mixture containing the linearized plasmid and corresponding inserts. This was followed by the addition of 240  $\mu$ L of the PEG solution, ensuring thorough mixing to achieve a homogenous blend. In this process, the empty plasmid was utilized as a positive control, while the linearized plasmid served as the negative control. The resulting particulate was incorporated into the transformation mixture, and the mixture was incubated at 30 °C for 30 minutes at 300 rpm. Subsequently, the mixture was subjected to further incubation at 42 °C for 40 minutes. Following these incubation steps, the cells underwent centrifugation at 13,000 g for 60 seconds to obtain a pellet, from which the supernatant was removed. The ensuing pellet was then suspended in 200  $\mu$ L of double-distilled H<sub>2</sub>O before being dispensed onto selective SM-Ura plates. These plates were then subjected to an incubation for three days at 30 °C. To perform the extraction of the yeast plasmid, the ZymoPrep™ Yeast Plasmid Miniprep II kit (Zymo Research, USA) was employed.

#### **1.4 Construction of Plasmids**

After completing the yeast plasmid extraction, the entirety of the plasmids was subsequently introduced into *E. coli* competent cells. A total of 50  $\mu$ L of *E. coli* competent cells (Top10 or *ccdB* Survival™ 2 T1R, sourced from Thermo Fisher Scientific, USA) were combined with the yeast plasmids, followed by incubation on ice for 25 minutes. Following this, a heat shock was administered at 42 °C for 90 seconds, followed by immediate transfer to an ice bath for 3 minutes. The cell mixture was then introduced to 500  $\mu$ L of SOC medium. The ensuing cell mixture underwent incubation at 37 °C with gentle shaking at 200 rpm for 1 hour. Subsequently, the cells were spread onto LB agar plates supplemented with appropriate antibiotics. These plates were then allowed to incubate overnight at 37 °C.

Colonies from each plasmid were selected and individually suspended in separate PCR tubes containing 10  $\mu$ L of double-distilled H<sub>2</sub>O, serving as the template for colony PCR. A distinct set of primers was employed to identify all genes present within each plasmid. From each plasmid, three positive colonies were chosen, and they were cultured overnight within a 50 mL LB medium containing the necessary antibiotics. The *E. coli* cells were harvested via centrifugation. For the purification of pure plasmids, a NucleoSpin Plasmid Kit from MACHEREY-NAGEL was utilized. Additionally, the sequences of all plasmids were confirmed using a DNA sequencing kit sourced from Eurofins Genomics.

**Table S1.4** Oligonucleotide sequences

| <b>Primer</b> | <b>Sequence (5'- 3')</b>                                                     | <b>Purpose</b>                                                      |                                                                      |
|---------------|------------------------------------------------------------------------------|---------------------------------------------------------------------|----------------------------------------------------------------------|
| HSHE15-P1     | GCCAACCTTTGTACAAAAAGCAGGCTCCGCATGGCGCCTCGAGACGAACA                           | Cloning for <i>mfnPKS1</i> into PEYA                                |                                                                      |
| HSHE15-P2     | CTCGCATCTCCATCTGCGAGAAATGCGCCGCGCATCGCCATGGTTCCCGG                           |                                                                     |                                                                      |
| HSHE15-P3     | CTCTAACCGCCCGGAACCATGGCGATGCGCGGCGCATTCTCGCAGATG                             |                                                                     |                                                                      |
| HSHE15-P4     | GATGACGAGCAAGCTGTGTGACCGGTGAGACTCGGCCCTTGAAGGTTGAA                           |                                                                     |                                                                      |
| HSHE15-P5     | AAGCTACATATTTCAACCTTCAAGGGCCGAGTCTCACGGTTCGACACAGCTT                         |                                                                     |                                                                      |
| HSHE15-P6     | TGCCAACCTTTGTACAAGAAAGCTGGGTCCGTACGAACTCTCAGCTGGAG                           |                                                                     |                                                                      |
| PKS3655seq-F1 | TCTTCAGACCACGCTTTTCAG                                                        |                                                                     |                                                                      |
| PKS3655seq-R1 | ATTGCAAAAAGTGACCCACG                                                         |                                                                     |                                                                      |
| 3653-1F       | TTCTTTCAACACAAGATCCCAAAGTCAAAGATGACAGTTCAGGACCCCAT                           | Cloning for <i>mfnL2</i> into pTYGs- <i>arg</i> under Padh          |                                                                      |
| 3653-2F       | GACGGATTCAAGAGTTACATGAAATTTACGGACCAATTGTCCGTATTAGC                           |                                                                     |                                                                      |
| 3653-1R       | CTTCATTCCGGGCTAATACGGACAATTGGTCCGTAATTTTCATGTAACCTCT                         |                                                                     |                                                                      |
| 3653-3F       | GCCTGCCACCACAGGTTAGAGGCAGCGGCTCGGTAGCCACGCGATCTTCT                           |                                                                     |                                                                      |
| 3653-2R       | TCGGTTGTTGAGAAGATCGCGTGGGCTACCGAGCCGCTGCCTCTAACCTG                           |                                                                     |                                                                      |
| 3653-4F       | TTTACCAAGCACATGTCCGATGATATGGCGCTGCTGATCAAACTCTCACC<br>GTTGATATGCCGAATCAAAT   |                                                                     |                                                                      |
| 3653-3R       | GGTGAGAGTTTGTATCAGCAGCGCCATATCATCCGACATGTGCTTGGTGAAA<br>ACACTAGCCGCAAGACCGAC |                                                                     |                                                                      |
| 3653-5F       | CAAGGGAAGCCGATCTTGCCCTTGGCATGAACTTGGCATTCTGTGAGCTGT                          |                                                                     |                                                                      |
| 3653-4R       | AGTGAGAGATACAGCTCACAGAATGCCAAGTTCATGCCAAGGCAAGATCG                           |                                                                     |                                                                      |
| 3653-5R       | CAGGTTGGCTGGTAGACGTCATATAATCATTATACGATAATCGCCCGCA                            |                                                                     |                                                                      |
| 3653Tadh-R    | TCGTAGCTGTTTTTCATTCTATGCGTTATGAACATGTTCCCTTATACGATAAT<br>CGCCCGCA            |                                                                     |                                                                      |
| 3654-1F       | TTCTTTCAACACAAGATCCCAAAGTCAAAGATGTCCAGCCAAAACACCAC                           |                                                                     | Cloning for <i>mfnL1</i> into pTYGs- <i>arg</i> under Padh and Pgpda |
| 3654-2F       | TGAGAACCCTGCGATCCGTTGTACTACTACTGGATGAGATGTTGAAGG                             |                                                                     |                                                                      |
| 3654-1R       | TCTGCGGCCGCTTCAACATCTCATCCAGTGTAGTAGTGTACAACGGATCG                           |                                                                     |                                                                      |
| 3654-3F       | TTGCGAAGGCAATGGCTGGCTTACGGCAAATGGACTACCCTTGGACTAC                            |                                                                     |                                                                      |
| 3654-2R       | CTTTGAGCAGGTAGTCCAAGTGGTAGTCCATTGCCGTAAGCCAGCCATT                            |                                                                     |                                                                      |
| 3654-4F       | AACGGCCACATCTCCAGGCTTTTGCCAAAGCAATTCCCCGACCTGAACTT                           |                                                                     |                                                                      |
| 3654-3R       | TTGAACAACAAAGTTTCAGGTCGGGGAATTGCTTGGCCAAAGACCTGGAGA                          |                                                                     |                                                                      |
| 3654-4R       | CAGGTTGGCTGGTAGACGTCATATAATCATTAGGCTCGCTTCAGGTAATA                           |                                                                     |                                                                      |
| Pgpda3654-F   | AGCTTGACTAACAGCTACCCCGCTTGAGCAGACATCACCGATGTCCAGCCAA<br>AACACCAC             |                                                                     |                                                                      |
| 3654Tgpd-R    | TCTTGCGAACTACGACAATGTCCATATCATCAATCATGACTTAGGCTCGCTT<br>CAGGTAATA            |                                                                     |                                                                      |
| 3658-1F       | TTCTTTCAACACAAGATCCCAAAGTCAAAGATGTGAGTAAACGTACACGAAG<br>TTCCC                | Cloning for <i>mfnR3</i> into pTYGs- <i>arg</i> under Padh and Peno |                                                                      |
| 3658-F2       | GGTAAAGCCTCTAAACTCTTCGACCGGATCCGTTTTCTGTCTACCAACG                            |                                                                     |                                                                      |
| 3658-R1       | TTATCGTTCGCGTTGGTAGACAGAAAACGGATCCGGTTCGAAGAGTTTAGA                          |                                                                     |                                                                      |
| 3658-F3       | ACACTAGGGACAAGGCTAATGTCTCACCATAAACGTACACGAAGTTCCC                            |                                                                     |                                                                      |
| 3658-R2       | CCTGTGGTAAGGGAACCTTCGTGTACGTTTTATTGGTGAGACATTAGCCTTG                         |                                                                     |                                                                      |
| 3658-F4       | AATTTCCAGAGTAACGTTCTAGTTCGATGAGATCTTCGGCGATATAATTGG                          |                                                                     |                                                                      |
| 3658-R3       | ATGGTGACCGCAATTATATCGCCGAAGATCTCATCGACTAGAACGTTAC                            |                                                                     |                                                                      |
| 3658-R4       | CAGGTTGGCTGGTAGACGTCATATAATCATTATAGTTTCTTCGGTCTTA                            |                                                                     |                                                                      |
| 007corect2-F  | CGACTGACCAATTCCGCAGCTCGTCAAAGGATGTGAGTAAACGTACACGAAG<br>TTCCC                | Cloning for <i>mfnL3</i> into pTYGs- <i>ade</i>                     |                                                                      |
| padh3652-F    | TTCTTTCAACACAAGATCCCAAAGTCAAAGATGACGGTGAACACACAAA                            |                                                                     |                                                                      |
| padh3652-R    | TTTCATTCTATGCGTTATGAACATGTTCCCTTAGGAAGATACATAGGAGG                           | Cloning for <i>mfnR4</i> into pTYGs- <i>ade</i> under Pgpda         |                                                                      |
| pgpda3659-F1  | ACAGCTACCCCGCTTGAGCAGACATCACCGATGGCTTCGAGAATCAACAC                           |                                                                     |                                                                      |
| pgpda3659-F2  | GCTGAACTGAAGGGTGTGAAACCCGGCAGTTCGACATCGGGCAGATTGC                            |                                                                     |                                                                      |
| pgpda3659-R1  | CGGAAGAGCGCAATGTGCGCGATGTGCAACTGCCGGTTTTCAACACCCT                            |                                                                     |                                                                      |
| pgpda3659-R2  | TACGACAATGTCCATATCATCAATCATGACTTAAATGGTCATGCCGATAG                           |                                                                     |                                                                      |
| 3657-Peno-P1  | CGACTGACCAATTCCGCAGCTCGTCAAAGGATGAAGTTCTCTGCTCAGCA                           |                                                                     | Cloning for <i>mfnR2</i> into pTYGs- <i>ade</i> under Peno           |
| 3657-Peno-P3  | CCCGCCACCAGAAAGGATGTTTCAACTATTGTCAAATACTGCAATGACAA                           |                                                                     |                                                                      |
| 3657-Peno-P2  | CTCAATGCTGTGTGTCATTGTCAGTATTTGACAATAGTTGAAACATCCTTCT                         |                                                                     |                                                                      |
| 3657-Peno-P5  | CTTCCCCTTCCGTGCGGACCGTCATCTCATGCTCTTCGATGTCCAGATCC                           |                                                                     |                                                                      |
| 3657-Peno-P4  | TTCTCAGTGGGGATCTGGACATCGAAGAGCATGAGATGACGGTCCGCACG                           |                                                                     |                                                                      |
| 3657-Peno-P6  | CAGGTTGGCTGGTAGACGTCATATAATCATTACCGGGTGGTAGCTTCCG                            |                                                                     |                                                                      |

**Table S1.4** Oligonucleotide sequences (continue)

|              |                                                     |                                                                    |
|--------------|-----------------------------------------------------|--------------------------------------------------------------------|
| HSHE13-P1    | GCCAACCTTTGTACAAAAAAGCAGGCTCCGCATGGCGCGCATCTCAAGGCC | Cloning and sequencing for <i>mfnPKS2</i> in PEYA                  |
| HSHE13-P2    | CTTTAGGAAATGGCCGCTATGTGTGTGATTTCTCTCTGTGCTCTCCTCTT  |                                                                    |
| HSHE13-P3    | GTAGATGGGCAAGAGGAGAGACAGAGAGAAATCACACACATAGCGGCCA   |                                                                    |
| HSHE13-P4    | GCATCGGTGCTATTGTATTGCTGGTCATAGCCTCCCAGGAAAACAGCGGT  |                                                                    |
| HSHE13-P5    | GGATTCCAATACCGCTGTTTTCCTGGGAGGCTATGACCAGCAATACAATA  |                                                                    |
| HSHE13-P6    | TCGTGGCCAAGGAATTAACCTGTTTCGGCACCTTAACGTGCCATTGGCTTG |                                                                    |
| HSHE13-P7    | AATATCCCCACAAGCCAATGGCACGTTAAGGTGCCGAACAAGTTAATTCC  |                                                                    |
| HSHE13-P8    | GGCTTGAGGACTCATCCCTTAGTAGTTCGTCATATAGGGACCATGTTGCA  |                                                                    |
| HSHE13-P9    | ATGGGTACGGTGCAACATGGTCCTATATGACGAACTACTAAGGGATGAG   |                                                                    |
| HSHE13-P10   | CAAAGAAAGTAGAGATGATCGGGGGATGACATGACTTGATCATCCTCAG   |                                                                    |
| HSHE13-P11   | ATTGTTCCAACCTGAGGATGATCAAGTCAATGTCATCCCCCGATCATCTCT |                                                                    |
| HSHE13-P12   | TGCGGAGGATACGTGTTTCGGATGCGGTGGCATTAGAACCAGATCCGTGT  |                                                                    |
| HSHE13-P13   | GGGGTTATCAACACGGATCTGGTTCTAAATGCCACCGCATCCGAACACGT  |                                                                    |
| HSHE13-P14   | TGCCAACTTTGTACAAGAAAGCTGGGTTCGGCTATGCAGCAGCCTCTTTGC |                                                                    |
| 3651Seq-F3A  | TCGTAACACTGGTCTCAACC                                | Cloning for <i>ilaPKS2</i> into pTYGs- <i>met</i> under PamyB      |
| 3651Seq-F1   | ATGGGCCGAGAGCTCATCG                                 |                                                                    |
| 3651Seq-F4A  | ACGCGATCTTGAAGGATCA                                 |                                                                    |
| 3651Seq-R1   | GGAGGAACCCTTCGTTTGCG                                |                                                                    |
| 3651Seq-F5A  | TGGCGCTTTATTCCTACT                                  |                                                                    |
| 3651Seq-F6A  | CTACGCGGACTTGGAGACAA                                |                                                                    |
| 3651Seq-F2   | AACAACCTCGAAGCGCCTGGA                               |                                                                    |
| PiPKS2-F1    | CTGAACAATAAACCCACAGCAAGCTCCGAATGAGCGGAAGAAATCCTAT   |                                                                    |
| PiPKS2-R1    | CGTCTCCAGCAAGAGCCGTTGTTGAGGGTCCATTGCTGCAGCCTCCTGCG  |                                                                    |
| PiPKS2-F2    | AATGTTCTGCCGAGGAGGCTGCAGCAATGGACCCTCAACAACGGCTCTT   |                                                                    |
| PiPKS2-R2    | TAGTGGAAAGTGTATCAAAC                                |                                                                    |
| PiPKS2-F3    | CATAGTTTCTCAGTGACTGC                                |                                                                    |
| PiPKS2-R3    | CGAACTCTTGAAGCTCTTTC                                |                                                                    |
| PiPKS2-F4    | AGTGGCGTCACATATTTAGT                                |                                                                    |
| PiPKS2-R4    | ACTCTCCACCCTTACAGACTACTACAGATTCAAGCCTTAGATAGACCAC   |                                                                    |
| PiPKS2-seq-1 | CAACCAGGACGGCCACACGG                                | Cloning of <i>ilaR2</i>                                            |
| PiPKS2-seq-2 | TACGTGGAACCTCGTTGAAG                                |                                                                    |
| PiPKS2-seq-3 | ATCGGATCAGGGCTTCGAGC                                |                                                                    |
| PiPKS2-seq-4 | CCTATTCAATCTTCCGAGGT                                |                                                                    |
| Pgpd-PiAct-F | ACAGCTACCCCGCTTGAGCAGACATCACCAGTGTCTTTTCGCCAAAGCTCA | Cloning of <i>ilaR8</i>                                            |
| PiAct-Teno-R | CAGGTTGGCTGGTAGACGTCATATAATCATCTATAACACACTAGACGGCC  |                                                                    |
| Padh-SDR2-F  | TTCTTTCAACACAAGATCCCAAAGTCAAAGATGGCTTCATATCTCATCAC  | Public primers located in all plasmids, for sequencing or cloning. |
| Padh-SDR2-R  | TTTCATTCTATGCGTTATGAACATGTTCCCTTACCAGGGAGCATTGGAGC  |                                                                    |
| SeqPEYA-F    | ACGGCCAGTCTTAAGCTCGGG                               |                                                                    |
| SeqPEYA-R    | CTATAGGGGATATCAGCTGGA                               |                                                                    |
| PamyB_S-F1   | CATGCTTGGAGGATAGCAACCG                              |                                                                    |
| PamyB_S-R1   | ACTCCAACGTACATCAAACTCA                              |                                                                    |
| Padh plugF   | ATTCAACACTATTATTTCCACCCTATAATA                      |                                                                    |
| Padh plugR   | GAGACGAAACAGACTTTTTTCATCGCTAAAA                     |                                                                    |
| PgdpA plugF  | CTTTTCTTTTCTTTTCTTTTCCCATCTTC                       |                                                                    |
| PgdpA plugR  | TACGACAATGTCCATATCATCAATCATGAC                      |                                                                    |
| Peno plugF   | CTTCTTAAATATCGTTGTAACGTGTTCCCTGA                    |                                                                    |
| Peno plugR   | CGAAGTATATTGGGAGACTATAGCTACTAG                      |                                                                    |



**Table S1.5 Protein sequences used in this study**

|                                                                                                                                                                                                                                                                                                                                                                                                                                                                                                                                                                                                                                                                                                                                                                                                                                                                                                                                                                                                                                                                                                                                                                                                                                                                                                                                                                                                                                                                                                                                                                                                                                                                                                                                                                                                                                                                                                                                                                                                                                                                                                                                                                                                                                                                                                                                                                                                                                                                                                                                                                                                                                                                                                                                                                                                                                                                          |
|--------------------------------------------------------------------------------------------------------------------------------------------------------------------------------------------------------------------------------------------------------------------------------------------------------------------------------------------------------------------------------------------------------------------------------------------------------------------------------------------------------------------------------------------------------------------------------------------------------------------------------------------------------------------------------------------------------------------------------------------------------------------------------------------------------------------------------------------------------------------------------------------------------------------------------------------------------------------------------------------------------------------------------------------------------------------------------------------------------------------------------------------------------------------------------------------------------------------------------------------------------------------------------------------------------------------------------------------------------------------------------------------------------------------------------------------------------------------------------------------------------------------------------------------------------------------------------------------------------------------------------------------------------------------------------------------------------------------------------------------------------------------------------------------------------------------------------------------------------------------------------------------------------------------------------------------------------------------------------------------------------------------------------------------------------------------------------------------------------------------------------------------------------------------------------------------------------------------------------------------------------------------------------------------------------------------------------------------------------------------------------------------------------------------------------------------------------------------------------------------------------------------------------------------------------------------------------------------------------------------------------------------------------------------------------------------------------------------------------------------------------------------------------------------------------------------------------------------------------------------------|
| <p><b>MfnPKS1</b></p> <p>MAPRDEHEPVAIVGMGCRWPGGVRNAPELWEFLDRDRTDGWREFFDPRFSAKGFHHPNSNRPGTMAMRGAFADGDARLFDHAFHGMTGLEVE<br/> TLDPSQRKLEVTYEALENAGETWDSVSGSRTGVFVGNFCLDHWMIQSRDWDNPRPYAFTGAGTSILANRISYIFNLQGPSLTVDTACSSSM<br/> YALHLAMNSIRAGDCDSAIIVASSNWIADPGVITALDKLGLSASARCHFFDARAEQYARAGEGFAAIYLRKPSLAITAGSPIRAMIRGTAINA<br/> NGRTGGITRPSAAGQEAIVIREAYRNAGNLPFSDTNYFECHGTGTYYVGDPIEVAAVGRVFAPERSSDPMVLGVSKSNVGHSEGASALASIMK<br/> VVLSENGAIPPLENLQTLNPNIDFDGAKVKPVTELTWPWKGRLLWRASINSFGYGGANGHCILDHVNVLDPYIKPGIYRSLTNGSTNGTNG<br/> TNGDSKTHRIVIVESPKLKSIEENATIRKLVLLPLSAHNEPSLKLNVLEALSQAINKFPLADVAYTLSARRSRLPQRHFCIVDKDNVVEGLTIEK<br/> KPVVRAPLNSNLGFVFTQGAQWHAMGAELFEYRVFQTAIDHLHDVLSLPTPPSWTLRDLISGNCADLIQTAEVSTACTAVQVGLVDLL<br/> ASWSVRPSGVAGHSSGEMAAAYASGRITAAEAIVAAVFRGQAVSKNEQTGAMLAVGLGPEQVSKYLEGLEDQVKLAAINSQGSVTLSEVPA<br/> IDKLSEAMNADSVFNRLKTTGGNAYHSHHMLPLGRNYIEILTNGLEHIQKQGLLDKSKRYALVPWASSVTPDKTIGELENHAAVWRSNLESP<br/> VRFSEAITNLVNLEETTINAIVEIGHPHALKSPIDQIVKAAGKTVAYASTLKRQEDARVSLTLAGTLFGVNSEIDLVAVNAVVDGAHGSLEH<br/> GCTSIDLPPYQTYTYGALNYHESRASKEYRYRKI PRHDLGSKVGVNARLKPQRNIRLMDKVPWLGDRHRLIPDAVLPAAGYLAMAVEAAGRI<br/> YNEFFPEPAKITGFSRLRDSIKTSLPIPEDDYGVEVLTSMELVDTATAKSPAWATFSSISVDRESNEWSEHCTGLVKVEISESESEKIAFAE<br/> DSSRATDSKAWYKFAAIGLGYGATFQPLSEIRADADKNLATAKVALNTADLTKGGESFYPLHPASLDGAIQGLIASHGGRIEAAHTAFV<br/> PVQVQQLYLKNGIEGDSCTAVVRGERRGIRAAWLDLQMLGPNGEVLLNVNLRICISYSESKSDHAFSSPFTRLVWKPDIRSLNQRGRAM<br/> RPPPKLVNPKLPLWGVMMKLAFFVYVYDKFGRDDEGPKPTADVGHFTEWTKRRSRLDMSPEMEEARSLTAEAREAKINELVSAAPDMEV<br/> KIAKLLHDNMDILYQRRGTVDVIAEGLLTPLYQTGLLMTGVYPQLYNVLDLSHANPNLRILEVGGGTGGATRIAMKAFRPNKIKRYRE<br/> YTFDTISAGFLGGARESIAEFKDMNFSVFAEVDPIEQGYEPVYDLVIACQVLHATSSMKNTLTNVRKLLKPGGQLLLETNKNFMVPGVVV<br/> GTFGTGYWAGIPDGRVDAFQSLSEAWDKALQNVGFSGLDIVLDDFPEPHNTTSVILSTYKGEPTTKKTASVNLLYSAETAPALLDQLAKELEG<br/> RGVSTKVGPLENEATSVQSSSRVVVFLDDKHLQDATEREQDITTFQHLARSTSSLVVITSCGTAKGRNPDGALI PGLLRVLTSPAGQYVSI<br/> DIDADNFVAVSADDAEDLVRISIVKFEFELHQPPSTDEEGNPKDREFVWQDGLSVCVSRVLDGDFHSGHIGDSQSVKTEQLPLDSQGAFAAF<br/> ETPGVLSLKYFKAYQELWQPLPADIYDVKVAAVGLNSKDIHWSGRSDANNLSSEYTGITITAVGSAVTLKVGDRVYGLGKQGFNFTRVPA<br/> SLAQKLPDDDLVQMATLPLVYVTAIYAFEAHAHLRKGQNVLVQAATS DLGLAALRFAQAKGANVFALVDTPEKARFLSDELSVPATHVILS<br/> SDPSNLRRAAGKTRKGGFDVINTAQSENHSLQALAPLGHFIDVQVDAQSAKAIGSELFQKNANFSSIDPFVLLDSDPELGEELIQAVD<br/> KYRQRGLIQPIRPTATDVSQSLQVLMDFSKGNLIGKLVATFSPESVVRMLPPSPTARFDSEAAVYVVTGGLGGLSLVRWMDHGHARHLAV<br/> LSRRSVDVAVPEAKLVE TLASRGVQVEPVVCDASSKQVTSVIQKIASARPIKGVVHAASVYLDLSFDKLEVDWRWQSLSAKVQGTKNLHEA<br/> TLNMPDFDFVMTSLLSVYALATQAGYTAGNNFQDLFARYRNLGLPASTASFSLISDAGSPYMDPITVDTFERNKTLTFLSEHFLLTLEPA<br/> FLNNTTSVETKPYQWFGQDDPLSVANLLTCLDPAGMLAKKRDEIEAGVTSTAALPRWYTDGRVSLIMRAFSDAQRHAFDGSDAAEGSKST<br/> VARLRREFDAAIQAGAGERANTITFVQNAITNTVAEMLFVDAEAVDPAKSVADHGVDSLIAAELRNWFHQALGTNISMLDLDLPSMKISALS<br/> EKITDSSLNPPAES</p> |
| <p><b>MfnL2</b></p> <p>MTVQDPIILVVPPIPSNLSFQPVWYLVVAGSVFLAYQLILALWNI SPFHPLSHIPGPKLAAATYIPEFYDAVLFGRYTRRIQELHEIYGP<br/> VRI SPNEVHCNDRFIDEIYAFGNRKRDKPAHQVRGSGSVAHAIFSTTDHDIHRMRGALAKFARSQVSKLEPKIQTLVHRLCDKILRAGE<br/> KAPFDITSAYSYCFSTVDITDYCFGDSFGFLTQESWEPNFRGPLYALLKPIFLFRFFPFLRYVGLAASVFTKHMSSDMLLIKTLTVDMPNQI<br/> VKTKNLDLAGITGKQQT VFGSLLSDLP IEEKSVERLTDEATALLSAATETISWMTV I SYHLLTKPELLKLTDEVNQAVDSSGQLPQWST<br/> LEKLPYMGAVIPEGLRLAYGVGSR TAR I APEEDLVYHGEWTPKGSKPKVTVDVYI PRGFP I GMSYVTHHDERIYPDSHSFIPERWLDEKMQ<br/> RRKDLERSMISFSKGRSCLGMNLAFCELYLSLAAMTVRVYPRMKLYETTEEDVAYDHD MFNP I PKASSKGVRAIIV</p>                                                                                                                                                                                                                                                                                                                                                                                                                                                                                                                                                                                                                                                                                                                                                                                                                                                                                                                                                                                                                                                                                                                                                                                                                                                                                                                                                                                                                                                                                                                                                                                                                                                                                                                                                                                                                                                                                                                                                                                                                                                                                                                                                                                                                                                  |
| <p><b>MfnR3</b></p> <p>MSVNVHEVPLPQAIGLVSFRVFGIFSTIVAVCLYGLYRWLLPKPIPGIPYNQKATMTLFGDAPDMVREVSVTGELRVWC AKQVKLNLSPICQV<br/> FIVFSPKWPIL IADFREARDILTRRKEFDKSSFLINGMAPMGDFHGIYKTEAFKANRQLIQDLMTSTFLNNLVGPAAHAKGLELIKLFETK<br/> MKLAKGRFPFSVKSDFEYASLDVMSLFAFNSNNWVKTAIIGPQLELLSQMNSEIPDASPDEPLTLKPAVDDFLMAIYEAPEVVEKLINAPAK<br/> VTLWVWKQAWYKFI DVKDRVLRQVAIAIENYRGGRVESGIEHMLMREAREAKQGRLPNFQSNVLVDEIFGDIIGGHTTS GAMMWLVK<br/> YLTDDHAPVQTKLRALHEALPTALEENRPTFEELRWAKI PYMEAIIEEMRLNNAVTVTREALCDTQILGHHIPKGTQVFLVSNPGPFSLPS<br/> MPIDDSLRSETSRAAKIRATWDETQDLTVDFPERWLKYKTDENGVEVTEFDGAAGPQLVFLGLPRACWGRRLAHMEMRTIISMLVWHFELLP<br/> TPQALSSYSGLGIARVQMCYIRPKKL</p>                                                                                                                                                                                                                                                                                                                                                                                                                                                                                                                                                                                                                                                                                                                                                                                                                                                                                                                                                                                                                                                                                                                                                                                                                                                                                                                                                                                                                                                                                                                                                                                                                                                                                                                                                                                                                                                                                                                                                                                                                                                                                                                                                                                                         |
| <p><b>MfnL1</b></p> <p>MSSQNTTTVQGPSILALAQNILELTQDMTKYLQVNGIAAPTALDAGDPNPTPEYRKIHASLKTNLEDLSRLIDGPRKWLREFCCSGYDLGA<br/> LQIALDEFFFTLIPADGGLTLKELAEKAGLDLDRTSRVRQLMTYKFFHEHTPGFITHSSTSLVMREDENLRSVVHYSLEMLKAAADSNIS<br/> LKANPFADQNHNFVTRHGVGIFEFYAKDPAKARRFAKAMAGLRQMDYHLDYLLKDGFDWAGLKGTVVDCGGNGHISRSLAKQFPDLNFV<br/> VQDSNADMLAEQKQLTDDIRDRVSYLQHSFFDPQPCQDVSAFLIRQC THNWADKDVVIRFKGFVPGLEGSSPETPLINDIIIEPPGVWPA<br/> HQERVVRQVDMVMLVNCAGKQRTKA EFDALLKEADPRYEIRKVDHNGPLGLLEVYLKRA</p>                                                                                                                                                                                                                                                                                                                                                                                                                                                                                                                                                                                                                                                                                                                                                                                                                                                                                                                                                                                                                                                                                                                                                                                                                                                                                                                                                                                                                                                                                                                                                                                                                                                                                                                                                                                                                                                                                                                                                                                                                                                                                                                                                                                                                                                                                                                                                                                 |
| <p><b>MfnR2</b></p> <p>MKFSAQQAVLGFSLQTLVAGSAIPRAPGTPQYFRPHGFTRRDLSVTQVQELGPQLSNGSLLFGPSDRWYAAIERYSTHAIIPDVEIVVQP<br/> ATEKDVSTIVKYCNDNIEFLAVNRGHSRSYSVAAFKGMQIDMAGLLDITIQPDGKSAWFQGGTYDQVMEYLWERYVATTGCSQCVGMMG<br/> PGLGGGHRQEGFYGMISDNLRNLNVVLADGTAVRVNSTSHADLLWGMKGAGHNFGIVTSFELNIYPREVDSWHYHTYTWKGDKLDVTINAL<br/> NKLHGNGTTPVNMAVNFSGFLNLT SVSTTEASLWWTFGYKGTAEANKVLKPFNDIGAEYEEFGDVPYPIQISDMQGTGIGGPLCAKNASHTT<br/> STVNLLTYNLTAEERQIYNRFSDWIK EYPELGPQAQIVHEGYSTEAVDKFPADDSAFPFRADRHLMFLDVQIPTENPRGINFTTVAREWAQEV<br/> QTMWNEGQPTRIPGAYVNYANGLEGPKMWYGEQWRQDRLLALKKKYDQNRFRFYNPVSEATTA</p>                                                                                                                                                                                                                                                                                                                                                                                                                                                                                                                                                                                                                                                                                                                                                                                                                                                                                                                                                                                                                                                                                                                                                                                                                                                                                                                                                                                                                                                                                                                                                                                                                                                                                                                                                                                                                                                                                                                                                                                                                                                                                                                                                                                                                                                                        |
| <p><b>MfnR4</b></p> <p>MASRINTILIGATTGIGEGELARRFHALGKKVITGRQRDLALAAELKGVETRQFDIGDIAALPGHVSAILKDYPKLDTVYVNAIQQCQY<br/> NIFDNSSITNEKVASEVA INLTAPNLLANLFAPHLNLA KSGTKTTFITTS LAYIPFSFYPTYCATKAGLQAFCKIFRQQLAFAGEGAQN<br/> MNVVEIVPPYVDTGLDAHRDYTIAAQGGKDKAFPPTPLKEFLDAVFAIGIEDVGPDGS IKKEIAVGFELGVLGVTWRGAFEKVYESIGMTI</p>                                                                                                                                                                                                                                                                                                                                                                                                                                                                                                                                                                                                                                                                                                                                                                                                                                                                                                                                                                                                                                                                                                                                                                                                                                                                                                                                                                                                                                                                                                                                                                                                                                                                                                                                                                                                                                                                                                                                                                                                                                                                                                                                                                                                                                                                                                                                                                                                                                                                                                                                                 |
| <p><b>MfnL3</b></p> <p>MTVKTPNSKMGSMTEETTCIPLTPLDHYPPGHYAFFGFFLPLNDGVTQDAYKVLQKGLLLAFS QLPWLGGKVYFQSPDTPGWRPGQLEMYE<br/> PVDLTVPGPYQLKYRELETDVGYEGLKERGFPLDTWADSSVMWSGVTDDAKGAEVFVAQANFIPGGCFLTAGLHHCVGDGTSTFDVLKIWA<br/> DNCHAVQSESWEPPQIPPESSDRNIMERIWEKENTGHSFSEMAPDAFRLLNLQPPGEE SKVEMKSGKINVQDEAMQAGIFYISAANFNKLRQ<br/> DCTRADGDSISLSGVDALCALVWRTLKARRAAAVQRQETDNFTSTMFPLTSDGRPNFNSMSPSYFGNVVLMQHNQLPLPKLTGSEASVGS<br/> VSRTIRTVANRVTAETVLDAYA IARSMDYSKLT LRLSLTHAFDMLMSVMVQEDLVCFRGGIFANGMPDTRPLMDDLNRFSRICYMLP<br/> RKKSGGVELVNVLFADEMEFLFKDPEFGGYASYVSS</p>                                                                                                                                                                                                                                                                                                                                                                                                                                                                                                                                                                                                                                                                                                                                                                                                                                                                                                                                                                                                                                                                                                                                                                                                                                                                                                                                                                                                                                                                                                                                                                                                                                                                                                                                                                                                                                                                                                                                                                                                                                                                                                                                                                                                                                                                                                     |

**Table S1.5 Protein sequences used in this study (continue)**

|                                                                                                                                                                                                                                                                                                                                                                                                                                                                                                                                                                                                                                                                                                                                                                                                                                                                                                                                                                                                                                                                                                                                                                                                                                                                                                                                                                                                                                                                                                                                                                                                                                                                                                                                                                                                                                                                                                                                                                                                                                                                                                                                                                                                                                                                                                                                                                                                                                                                                                                                                                                                                                                                                                                                                                                                                                                                                                                                                                                                                                                                                                                                                                  |
|------------------------------------------------------------------------------------------------------------------------------------------------------------------------------------------------------------------------------------------------------------------------------------------------------------------------------------------------------------------------------------------------------------------------------------------------------------------------------------------------------------------------------------------------------------------------------------------------------------------------------------------------------------------------------------------------------------------------------------------------------------------------------------------------------------------------------------------------------------------------------------------------------------------------------------------------------------------------------------------------------------------------------------------------------------------------------------------------------------------------------------------------------------------------------------------------------------------------------------------------------------------------------------------------------------------------------------------------------------------------------------------------------------------------------------------------------------------------------------------------------------------------------------------------------------------------------------------------------------------------------------------------------------------------------------------------------------------------------------------------------------------------------------------------------------------------------------------------------------------------------------------------------------------------------------------------------------------------------------------------------------------------------------------------------------------------------------------------------------------------------------------------------------------------------------------------------------------------------------------------------------------------------------------------------------------------------------------------------------------------------------------------------------------------------------------------------------------------------------------------------------------------------------------------------------------------------------------------------------------------------------------------------------------------------------------------------------------------------------------------------------------------------------------------------------------------------------------------------------------------------------------------------------------------------------------------------------------------------------------------------------------------------------------------------------------------------------------------------------------------------------------------------------------|
| <p><b>MfnPKS2</b></p> <p>MARISRPTPRKNGVFPFSPKDYTHTNNGVSYSRSRPVAIVGMACRFAGDATSPSNLWDLCCANGQVGRSFIPEAVDSQVDGQEEESTERNHHTHSGHFLKNDTSSFDVAFSNLVDKTVGQDFQARLLLESVYQATEDAGIPIENLADSENTAVFLGGYDQYQNSTDAVLPYSYPTGKSRSTSGASLVSNEFNLQGASMSIDTQSSSDLAALHGGCQTLRLGEADVSVIGACTLNPQELFDDSSGSDRGEVAVLVIKSLDDAALPKDKRHHAIIRNTGNLQSGKNTGTSPSAEAQIKLIEDCYRRAGLDMADTAYVEASMAEVEANAEEIEALDRFTGKSRGSEEPFVGVSVKQNIIGNTERVSGLAAIIKAAIAMQNGLVAPSLNPNIPTSQWVHVKVPNKLIIPWPRDRKLRASINKFGRDGSNAHVIIDGAPNAVARRLSGNSLREKAAQSPDKSRVFLVLSARDSTAEVMAKNLSAHLRRLLESQAPGSSSLAYTLATRRSRFPWVTMTRASNPELATGLGEPVKAVHSTKEPRIGFVFNQGAQWYAMGRELIAEYVPFRRAIEDADKVLNGYGATWSLYDELRLDESSSRVSVQVILAQSVTVLQICLVRLLESWGIVPHAVSSHSSEVEAAAYAAAGLLSFKEALGVVYFRDGLLAKLESQSASRPGGMLAAGLGPQVEPYLANTEGGRAVIACVNSPESVTLAGDLAAINEVLARLEKDGIFARKLKVPLAYHSHHMLDMAQEYAGALTAIPRRPSWPAKALYASVPTGDIIESPDILTPEYVWQNLTDVPLFSQALEAMCFDTEVSAQAQSNVMDLVEIGPHS TLAGPIRQILKTRMMPYTSCLKRSENAVHTMQALAGELLNRGYPVSLKEVNFPLGDNQDPQTFVFNLPITYPWSHASTTESKATKTRIRQRRFA RHELLGTHLASSSGLVHEWRNLRSLSDIAWLSHDHKVDSNVVLPAGYVAMAVEAVRLLADPAEKSTRGYQLRDVEILNALVI PDSFSSVEETHLRLLTPCSEKELDYEGWYDFNISSMNADGDWVSNCKGMVSAVSEAAAIAAPKAADFNEEAFFPRGTKARRISVSSLSQSDLRKMGIEYGPAFQNLIGSQAAANKSASSMFRNPMPIKKNQKLVHPTTLDISIQAATYSGLPDDAKRDTTLLSLKSRNLYISRDLGRISGAKLKAFANRTKTEK KGLTSSVTVLNNDANEGFLQIDGLFCQSIPIHIEEISEESEQTLCKYKTHWEVDVRYRVPASVKESMRVILGRDDAEFEKMKVRSYLIHDAVAELGPGYLDMSMEKGFETLRRLLFRSSRGVWLWLSGGVLDAAAPSFSGIKQLLRLLRVENPNKRYAHLDFEYGVKLNAGLIVRGEVSPQELLKNGNLLSQYFAELPRLRDRTYKQLSKVAEFYAVTSPGANVLEIAGTGGVSVQVILQAFGARNGSGTLLGSYTYTDLQDDALHGAAQLRAPWGD MVQFQKLDIGQDLAKQSPFKGGEYDLIVVPLALYSTTSVKNALHTIRSLKLDGKLLILEPTSNKLDMLQFLGTSPEWVWVNDPDKLSPILSLQGWDDTLRETGFTEGDFDIDGCEQPEFGQTSIILTGLQLQSLYLEPVSIVHTAVPDKQWLKHLSSAIRGQTGFAPVVESENAQPEDRICIFTAEMLGPYLDMSMEKGFETLRRLLFRSSRGVWLWLSGGVLDAAAPSFSGIKQLLRLLRVENPNKRYAHLDFEYGVKLNAGLIVRGEVSPQELLKNGNDFGANPAGIDWEYSVKGSVLYVPRIYADLETSAVVSSDRVDPPEPQPFQQLERSLVKPLATNDPHNFCFVDNEELTSDIPAGMVEIEPKA FGLNTRDIPVDGIEETASAHDLGIVVRLGPDTKQSGLVKGVDRVYGLAKRGLANVSRAPWTSIAKVPAMESFETAALPTAHITAYYSLHVARLQAGESILIHNAASDVGQAATTLAQYIGAKIFVTCGTEAQKGLLVEKYGIDPTRVLSKSNANFARDIMAQTGGVGVDAVNLNSLGSLLKATWECIASFGRLLVDIERTNSNKRDLMTFFGRSATYTSVDILQCEFRRLSQVLEALQETLRICFTANSGRTHIPRISYPISELEAGIIGHVKEIHFHFKSIVPTEDDQVNVIPRSSLSSNSQYETFMVAGSSGVEVNHATISWLEIKKARNIVVSHDAEENLSAAYLQEEAAGSGCNIHFRNC DIADEKSLVKLLKELAGSLPPIRGVINTDLVLNATASEHVSSAGTWNLHKHLPDLSFFIMLSSIAGVTGHPSQATYAADQAFRDALARHRIA RGLPAVSLDLPATISAETAQANEMTTSLDMDKVLRLVEAAVTHSLKHGPPDDAQVIVGLQPPWQDLSDATIARADPRFGTLQLAVPRATSSST ATTPEGSVMGVTPDILLQALKLSSSEDSIKLATEAVALAELLNVDAGEIHRDASIMSHGVDSLSAVEIRNWLGTVAKAKVSIABILRDTPLPEFSALVLSRSAEQKAAA</p>                                                                                                                                                                                                                                                                                                                                                                                                                                                                                                                  |
| <p><b>IlaPKS2</b></p> <p>MSGRNPIPLAIVGIGCRIPGDATSPKILWDLMLANGKSAWSKVPADRWNEEAFHLPDPTDNGTHNHAGGHFLKQDIGAFDASFFNVLPQEEAAMDPPQRLLETTTYEALESAGIRQEDIQKSNATVYMMAMFTRDYDRNVYKDMMSIPKYHVVTGTGDAIILANRISHLFDLNGPSATMDTGCSGGM TAI SHACQALRSGQSDMALAGAANLILSPDHMISMSNLHMLNADGRS YSFDNRGAGYGRGEGIATLVIKRLDDAIRDNDPIRAVLLDAAVNQDGH TAGITLPSGAAQKSLERRVWENLNIHTQDVGYVEAHGTGTLVAGVSAELEGISQVFCQNRDPSPLVGSIKSNIGHLESVSGLAAMIKS ILILEHGAIPPNVNFYPRASLDLEKKKIKVPQALEPWSQPGVARISINSFGYGGANAHAVLERP SRLTATEQEEAVPDEIPRFLILTAASQSSLLSMLGTTEEWVSKNFNQSLRDLSTLSQRRSIMPWRFS CAASNQAELEALNKGAKKTDSTIRISPDVRSFVFTGQGAQWAGMGCEL LSDPTYRDSIHQSTKILHLGATWNLVEELLRKEQSRLEKAEALQAPATTAIQIALVDLVRWGIIPDAVVGHSSEIEAAYAAAGYLSQHEA LKISYFRGFSSAISKNKGLGKGMALAVGVGEHDVAQYIGILKQGVAVVACQNSPSTTISGDAAISELSEILTPQKAI DPNRKLNVDTAYHSH HMQAAADEYKAGLGYIVQDALPKTTIKMFSSVTGSLKSSGFDGDIWTSNLTNKVRFCDALQSLCREEQTSRSVQPHRIFIEIGPHSALAGP ARQCIA DLEEMPYSYTSALVVRGTGALQSALTMVGSVFNHGYQVNLAEISASDPTSVNASVLYKLPSPYWDHRSKRHWHESSLRDRYLRKHP YHDLGLRMTDNTPLRPAWRHMI GVEGLPWRDRHVDGLMIFPGAGYLCMAEEAVQLAGDRHQAKKIRQIQLEDVDFLKLGLVIEGRTRVE VQLSYFVEADLNGKTMQHSFVSTAYTGEHWNHEHCRGLQGETVFEFASNEFSFTITYGEISDQFDTLSTKSIQPDDVLLYKELERVPSSHI I TFGIEEFTLES DRAISLVMI PDVVSVM PARHIRPHI IHPSTLIDILHGS LPLVNQKLGAGSVMPVRIGDLTISSEVENAPGKMLSAVTTLT STHFRAAEADLVVFPKAVSTSTPVI SVSGMELRSLASNDIEDAGIRGREICYEMKWPDERFLSEKQLEPLQAVVSDPPLAHCYALMSQY LEHKAFKQSKISVIEIGGVSGGATLSFLQALQSYGARPSVDFGFKDTLGDVESELQDWSDVVTFKPLDIETDTS DQGFEQNSYDVVLCNT LFTKYNFVSSMRNLLKPDGMLLLEIETTATQNLRSSEWSTLAEASLKLQAAQVDDSMKPTFIVARVNDNANI DPLPEIEFTIIEPTL SHTMKNFVTEISMSNALHSKEVQITTTSWESKQTHKDVIIHVVIDDGSNPILAGVGEPEKFSVVDLLQRP SKVIWISAQDEEKDMFSPRKH LI TGLARTAHAENEDLAMVTIDVQQTLDQKTKPAILNLFMEVLQSFNKANIQREREYVYNGTDVLI PRVIPS GKLNRQVSGNDETITETKMFTA SRVPLKLDNKKDSFTHPVFEDEIHRQDLGKDCVEIEGKAFGIPSQSPQHSNIINEYSGVVTATGSDVSSFVKGVDSVAVFSSVPAQRLRV PATQVQLIPRGLSFIIMAAALPISFMNACHALIDIANIQPGETVLEIDGAATDIGQAAISVAKHLGAEVIAAVSRVDEPNLYKELERVPSSHI I PRESYLGRHRIQKLVGPGGLSVLGC AKSVSNEIEF LQPFGLTVQIGGSGKPVKLTAKVSNVTVSTFDLEFLVRAKPKASQLLQKVMEM ASQGLTLPSONTALPLDNI DEALKQARHEDVNKYVLEVQEHSTVRAARPSYTLPKLDSGVTYLVAGGMGLDGLRLLRLMAKAGARYLVTL SRRGATPAEREKVEKELQFEGPGCSLYCIKCDVSKETSTTAALSEITAKGFPQVKGVIQATVALRDSTLDTMTAEDFNSVLQAKAQGTLLNKK TFASEDLFFIISFSAANIIGTAGQANYNAGNSLQDALAQFDRSPNCFYMSLNI GTIEDATVNNEAIQSLRDAQGLTPVILHNEALLALFEYAL SAEARETGCHQAVIGFTPETIAGTTAINGS AHTPMFTHVRQADEGGVENDATNKAKTFKDIIGETS SKDEISAFVAQVIGKKLAE LIAIDPV DVNLGSSITDFGLDSLIAIELRNWMMREFDAIQSSEVLDNQNIWTLAQKVTMRSRLANGDGTDS SSSSEGNVASTLPTSRSPSQERQKRAF EQPPLPIDLGETLRFADSRKGISPEELAEETERVIEEFQSSGLELQDALRVNPSGPD SRLEFYENNIHIERREPLQDHALFYIGHLTDGA PTHSQAERAAIVTVATLDFKKRYESGKLEQNSLNDIPLCMTMKWFMFNSVQEPKELDKAQKYASNNNVI VLRRGHIFEI AVREEDNYTSLT ALFTDIIASSEHIIPVSVLTSKRDRHWAE LRSKLRAVKANAVLLEAIESAAFVSLDDSSPVTSSERCTSILLNLDLHLTNRWLDKILQLTV AANGVSSILAENSKLDGLSTRQLENYITDEIFHNPCVTPLEKPIPASTVRELQFEIPSTISKAIAEQTKNNLSHYNTIGASRHYSELRS FLGSKGLRSKGTVLSILLANLRFYGYFEPIWETVTVSKYAKGRIDWLQNLCTPDIVHWIEKALEFMEDEGKGDVAELASKLKDAI GHAQTLR RVADGRGYVEPLYSLMGTSLAEKGPLPLPFLSSSAWRHSDRNLT PKRAKTDLPGISGGYMRMQEGGF LMPNPNVSVFVHYEVHHPDPLILVQGRE DDVARFEDCLNESIRTVRAI IERGLSKA</p> |
| <p><b>IlaR8</b></p> <p>MASYLITGASRGLGLELTRQLSTRSDVGKIFATARGDAPKLQQLASTSPDKIVVVKLDVTDEASIKQAAAEVE SKLAGKGLDVLINNAGVLQYAPKGVSSMENLQESFNINVLGVHWTTRVFIPLLQKGTQKKIVNISTTIGSLALSRFVHLLPAPAYKITKAALNS LTVQYALDYEKEGFTIFALSPGWLRDLDLGGEQADLPVEQGAEEALVRLIGSTPEQNGQFLKIEIKGWDKDKRNYDGSNAPW</p>                                                                                                                                                                                                                                                                                                                                                                                                                                                                                                                                                                                                                                                                                                                                                                                                                                                                                                                                                                                                                                                                                                                                                                                                                                                                                                                                                                                                                                                                                                                                                                                                                                                                                                                                                                                                                                                                                                                                                                                                                                                                                                                                                                                                                                                                                                                                                                                                                                                                                                                                                                                                                                                                                                                                                                                                                                                                           |
| <p><b>IlaR2</b></p> <p>MSFAKAHNPWRQVTPGTYIQDYDSWQSVQAIWNNVDREGRRLHMLASCIEIQSNITDLESRLSAWLAARYFHPGLATELGEYKAYRVPTAELEAWNDT FIMPACANAEEFQKQHLSTSPD SHLHWFPKTKQLLFTAHHTLFDATALWLFWGA YLDLVI SPKI VTFGDEWKNLPLARDDLLGLPKYPSLAGNVKGLSMITNALKPDAIELP LNTTNSDQVVPNGRSRNEFLRLALS AEQSTAI IQACKRR GTSITAAEFTAISLTCQKIQREYGSAGRYAIGFHNFDSPWFPRELASFVNAGNDPHAMIPFTVDLDGKSFELAKITDENFKSIRADFG NDPAGLDAVSHMLKGLLNDGPIATFPGFSTFGVADRVIKTAHYHDEVGGWIKIEDSYHWIQNMVKGMNAVCVYNWKG RMYLGGCFNEAYH TKEMFHLRFRDSDLILHTFNLGMPGSSVL</p>                                                                                                                                                                                                                                                                                                                                                                                                                                                                                                                                                                                                                                                                                                                                                                                                                                                                                                                                                                                                                                                                                                                                                                                                                                                                                                                                                                                                                                                                                                                                                                                                                                                                                                                                                                                                                                                                                                                                                                                                                                                                                                                                                                                                                                                                                                                                                                                                                                                                                                                                                                                                                                                  |

**Table S1.6** Plasmids constructed in this study

| Construct ID | Plasmids                            | Features                                                                                                                                          |
|--------------|-------------------------------------|---------------------------------------------------------------------------------------------------------------------------------------------------|
| PL01         | pTYGS_arg-mfnPKS1                   | <i>PamyB</i> promotes <i>mfnPKS1</i>                                                                                                              |
| PL02         | pTYGS_arg-mfnPKS1-mfnL2             | <i>PamyB</i> promotes <i>mfnPKS1</i> , <i>Padh</i> promotes <i>mfnL2</i>                                                                          |
| PL03         | pTYGS_arg-mfnPKS1-mfnR3             | <i>PamyB</i> promotes <i>mfnPKS1</i> , <i>Padh</i> promotes <i>mfnR3</i>                                                                          |
| PL04         | pTYGS_arg-mfnPKS1-mfnL1             | <i>PamyB</i> promotes <i>mfnPKS1</i> , <i>Padh</i> promotes <i>mfnL1</i>                                                                          |
| PL05         | pTYGS_arg-mfnPKS1-mfnL2-mfnL1       | <i>PamyB</i> promotes <i>mfnPKS1</i> , <i>Padh</i> promotes <i>mfnL2</i> , <i>PgpdA</i> promotes <i>mfnL1</i>                                     |
| PL06         | pTYGS_arg-mfnPKS1-mfnL1-mfnR3       | <i>PamyB</i> promotes <i>mfnPKS1</i> , <i>PgpdA</i> promotes <i>mfnL1</i> , <i>Peno</i> promotes <i>mfnR3</i>                                     |
| PL07         | pTYGS_arg-mfnPKS1-mfnL2-mfnL1-mfnR3 | <i>PamyB</i> promotes <i>mfnPKS1</i> , <i>Padh</i> promotes <i>mfnL2</i> , <i>PgpdA</i> promotes <i>mfnL1</i> , <i>Peno</i> promotes <i>mfnR3</i> |
| PL08         | pTYGS_ade-mfnR2                     | <i>Peno</i> promotes <i>mfnR2</i>                                                                                                                 |
| PL09         | pTYGS_ade-mfnR4                     | <i>PgpdA</i> promotes <i>mfnR4</i>                                                                                                                |
| PL10         | pTYGS_ade-mfnL3                     | <i>Padh</i> promotes <i>mfnL3</i>                                                                                                                 |
| PL11         | pTYGS_ade-mfnPKS2-mfnL3             | <i>PamyB</i> promotes <i>mfnPKS2</i> , <i>Padh</i> promotes <i>mfnL3</i>                                                                          |
| PL12         | pTYGS_met-ilaPKS2                   | <i>PamyB</i> promotes <i>ilaPKS2</i>                                                                                                              |
| PL13         | pTYGS_met-ilaPKS2-ilaR2             | <i>PamyB</i> promotes <i>ilaPKS2</i> , <i>PgpdA</i> promotes <i>ilaR2</i>                                                                         |
| PL14         | pTYGS_met-ilaPKS2-ilaR8-ilaR2       | <i>PamyB</i> promotes <i>ilaPKS2</i> , <i>Padh</i> promotes <i>ilaR8</i> , <i>PgpdA</i> promotes <i>ilaR2</i>                                     |

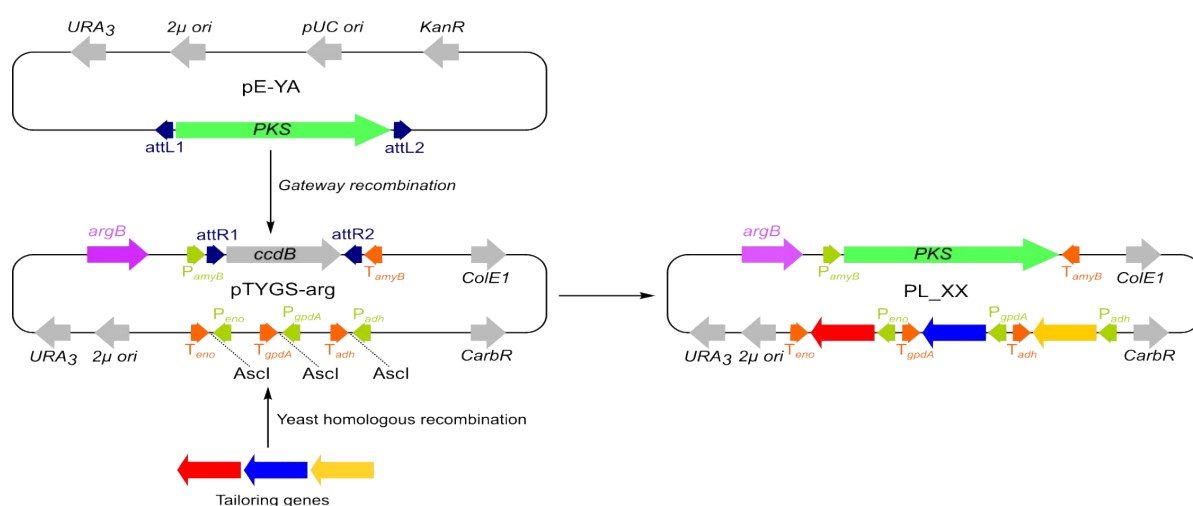

**Figure S1.13** The workflow of construction of plasmids

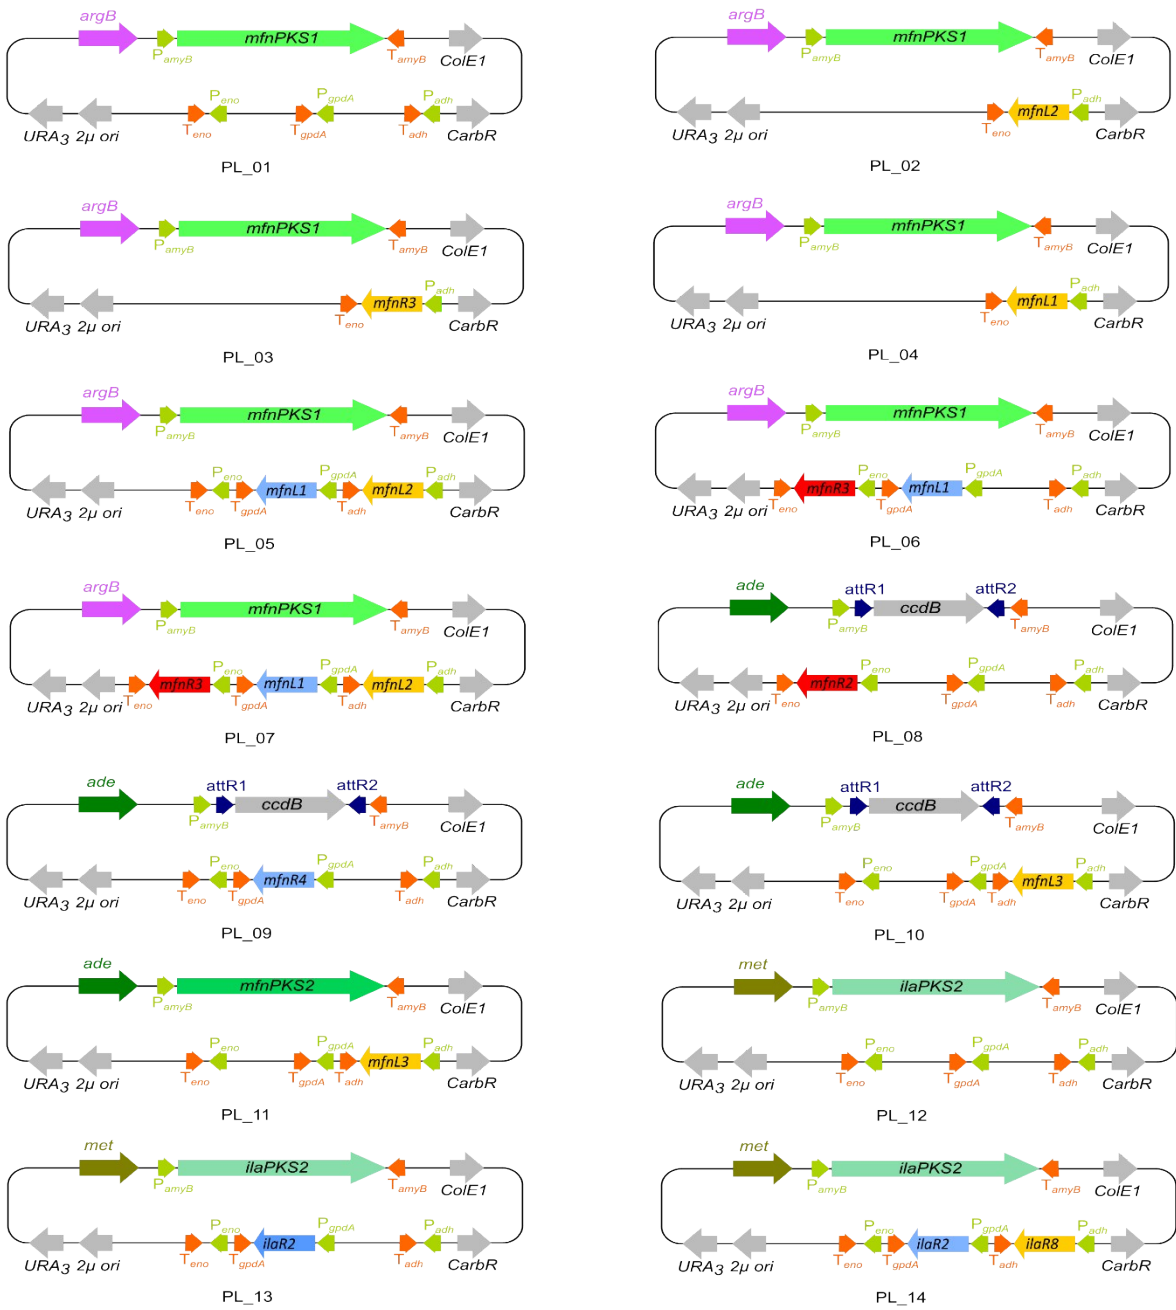

**Figure S1.14** The built plasmids for heterologous expression experiments in *A. oryzae*

**Table S1.7** Media and buffer

| Media / buffer              | Ingredient                                                                                                                                                                                                                             |
|-----------------------------|----------------------------------------------------------------------------------------------------------------------------------------------------------------------------------------------------------------------------------------|
| YPAD Agar or medium         | 1.00 % (w/v) Yeast extract; 2.00 % (w/v) Tryptone; 2.00 % (w/v) D (+)-Glucose Monohydrate; 0.03 % (w/v) Adenine; 1.50 % (w/v) Agar;                                                                                                    |
| SM-URA Agar                 | 0.17 % (w/v) Yeast nitrogen base; 0.50 % (w/v) Ammonium sulfate; 2.00 % (w/v) D(+)-Glucose Monohydrate; 0.077 % (w/v) Complete supplement mixture minus Uracil; 1.50 % (w/v) Agar                                                      |
| LB Agar or medium           | 0.50 % (w/v) Yeast extract; 1.00 % (w/v) Tryptone; 0.50 % (w/v) Sodium chloride; 1.50 % (w/v) Agar                                                                                                                                     |
| SOC medium                  | 0.50 % (w/v) Yeast extract; 2.00 % (w/v) Tryptone; 0.06 % (w/v) Sodium chloride; 0.02 % (w/v) Potassium chloride; 25 mM final concentration Magnesium chloride hexahydrate 2M; 1.0 % final concentration D(+)-Glucose Monohydrate 20 % |
| DPY agar or medium          | 2.00 % (w/v) Dextrin from potato starch; 1.00 % (w/v) Polypeptone; 0.50 % (w/v) Yeast extract; 0.50 % (w/v) Monopotassium phosphate; 0.05 % (w/v) Magnesium sulfate hexahydrate                                                        |
| PDB                         | 2.40 % (w/v) Potato dextrose broth                                                                                                                                                                                                     |
| GN medium                   | 2.00 % (w/v) D (+)-Glucose Monohydrate; 1.00 % (w/v) Nutrient broth;                                                                                                                                                                   |
| CZD/S Agar                  | 3.50 % (w/v) Czapek Dox broth; 18.22 % (w/v) D-Sorbitol; 0.10 % (w/v) Ammonium sulfate; 0.05 % (w/v) Adenine; 0.15 % (w/v) L-Methionine; 1.50 % (w/v) Agar; or 0.80 % (w/v) Agar for soft agar                                         |
| CZD/S1 Agar                 | CZD/S Agar without Adenine                                                                                                                                                                                                             |
| CZD/S1 Agar/ w/o Methionine | CZD/S Agar without Adenine and Methionine                                                                                                                                                                                              |
| FCC solution                | 5% (v/v) glycerol; 10% (v/v) DMSO; ddH <sub>2</sub> O                                                                                                                                                                                  |
| PEG solution                | 50% (w/v) polyethylene glycol 3350; ddH <sub>2</sub> O                                                                                                                                                                                 |
| ssDNA                       | 2 mg/mL salmon sperm DNA; TE buffer                                                                                                                                                                                                    |
| Solution 1                  | 0.8 M Sodium chloride; 10mM Calcium chloride; 50 mM Tris-HCl; pH 7.5.                                                                                                                                                                  |
| Solution 2                  | 60% (w/v) PEG3350; 0.8 M Sodium chloride; 10 mM Calcium chloride; 50 mM Tris-HCl; pH 7.5                                                                                                                                               |

## 1.5 Transformation and Selection of *A. oryzae*

*A. oryzae* NSAR1 was cultivated on a DPY plate for 5-7 days. Conidia were then introduced into 50 mL of GN medium within a 250 mL flask. This flask was subjected to overnight incubation at 28 °C with shaking at 110 rpm. Following this, the grown mycelia were gathered through a sterile Mira-cloth filter. Subsequently, these mycelia were placed within a 25 mL solution of 0.8 M NaCl containing 15 mg/mL of lysing enzyme. This combination was housed within a 50 mL Falcon tube, which in turn was positioned on a Stuart SB3 rotator. The entire assembly was maintained at room temperature and incubated for 4 hours. To release the protoplasts from the hyphal strands, gentle pipetting was employed using a wide-bore pipette. Subsequently, the resulting supernatant was passed through another sterile Mira-cloth filter and collected within a new 50 mL Falcon tube. This collected solution was then subjected to centrifugation at 3000 x g for 5 minutes to gather the protoplasts.

The resulting supernatant was discarded, and the pellet comprising the protoplasts was suspended in 1 mL of solution 1. This resuspension was subsequently partitioned into 10 separate tubes, each housed within a 15 mL Falcon tube. Plasmids were then introduced into the protoplast solution following a protocol: for a single plasmid, 1 µg of the plasmid was utilized per tube; in the case of two plasmids, 3 µg of each plasmid was introduced into a single tube; for three plasmids, 6 µg of each plasmid was added to a single tube. To serve as a negative control, 10 µL of water was introduced into one of the Falcon tubes. Correspondingly, empty plasmids were utilized as positive controls, adapted to the selection media requirements.

The mixture of the protoplast solution and the plasmids underwent incubation on ice for 2 minutes. Following this, 1 mL of solution 2 was added to each tube. Subsequently, the tubes were gently inverted several times to ensure thorough mixing of the protoplasts, solutions, and plasmids. The tubes were then subjected to incubation at 28 °C for 30 minutes. Next, pre-warmed 12 mL of CZD/S soft agar was introduced to each tube and mixed meticulously. The resulting mixture was then overlaid onto

two prepared CZD/S agar plates. These plates were subsequently incubated at 28 °C for 4-5 days, allowing time for colonies to develop. Upon emergence of colonies, these were transferred to another CZD/S selection plate for a day. This process was repeated by streaking single colonies onto new CZD/S plates. Subsequent to this, the colonies were cultivated for 5-7 days on DPY agar. The spores and mycelia were harvested and introduced into DPY medium for fermentation. Meanwhile, the spores were also transferred to create glycerol stocks for future use.

**Table S1.8** Combinations of plasmids for each experimental group

| Gene | <i>mfnPKS2</i> | <i>mfnL3</i> | <i>mfnL2</i> | <i>mfnL1</i> | <i>mfnPKS1</i> | <i>mfnR2</i> | <i>mfnR3</i> | <i>mfnR4</i> | <i>ilaPKS2</i> | <i>ilaR2</i> | <i>ilaR8</i> | Plasmids                 |
|------|----------------|--------------|--------------|--------------|----------------|--------------|--------------|--------------|----------------|--------------|--------------|--------------------------|
| Exp  | hrPKS          | O-AcT        | P450         | O-MeT        | hrPKS          | FMO          | P450         | SDR          | hrPKS          | O-AcT        | SDR          |                          |
| 1    |                |              |              |              | ✓              |              |              |              |                |              |              | PL01                     |
| 2    |                |              | ✓            |              | ✓              |              |              |              |                |              |              | PL02                     |
| 3    |                |              |              |              | ✓              |              | ✓            |              |                |              |              | PL03                     |
| 4    |                |              |              | ✓            | ✓              |              |              |              |                |              |              | PL04                     |
| 5    |                |              | ✓            | ✓            | ✓              |              |              |              |                |              |              | PL05                     |
| 6    |                |              |              | ✓            | ✓              |              | ✓            |              |                |              |              | PL06                     |
| 7    |                |              | ✓            | ✓            | ✓              |              | ✓            |              |                |              |              | PL07                     |
| 8    |                |              | ✓            | ✓            | ✓              | ✓            | ✓            |              |                |              |              | Exp 7+ PL08              |
| 9    |                |              | ✓            | ✓            | ✓              |              | ✓            | ✓            |                |              |              | Exp 7+ PL09              |
| 10   |                | ✓            | ✓            | ✓            | ✓              |              | ✓            |              |                |              |              | Exp 7+ PL10              |
| 11   | ✓              | ✓            | ✓            | ✓            | ✓              |              | ✓            |              |                |              |              | Exp 7+ PL11              |
| 12   |                |              | ✓            | ✓            | ✓              |              | ✓            |              | ✓              |              |              | Exp 7+ pTYGS-ade + PL12  |
| 13   | ✓              | ✓            | ✓            | ✓            | ✓              |              | ✓            |              | ✓              | ✓            |              | Exp 11+ PL13             |
| 14   |                |              | ✓            | ✓            | ✓              |              | ✓            |              | ✓              | ✓            | ✓            | Exp 11+ pTYGS-ade + PL14 |

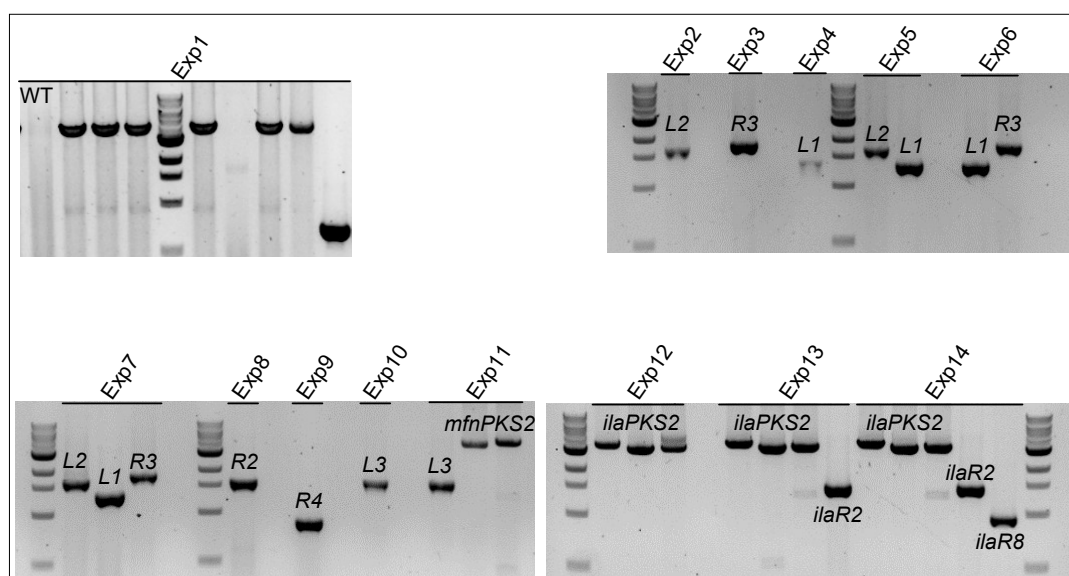

**Figure S1.15** PCR amplification using the gDNA as templates for each experiment. In exp 1, WT represents untransformed strain. The *mfnPKS1* was amplified using primer pair PamyB\_S-F1/ PKS3655seq-R1 for 8 transformants. The *mfnPKS2* was amplified using primer pairs PamyB\_S-F1/ 3651Seq-R1, 3651Seq-F4A/ PamyB\_S-R1. The *ilaPKS2* was amplified using primer pairs PamyB\_S-F1/PiPKS2-R2, PiPKS2-F3/ PiPKS2-R3, PiPKS2-F4/ PamyB\_S-R1.

## 1.6 Fermentation and Analysis of Compounds

Transformants were obtained from DPY agar plates through scraping. Subsequently, a 1 mL spore suspension was introduced into a 500 mL baffled flask containing 100 mL of DPY-medium. This mixture was then incubated at 28 °C with shaking at 110 rpm for 5-7 days. The entire culture was blended using a hand blender. After homogenization, a separation process was employed using filtration. Following this, a dual extraction was carried out using ethyl acetate. Once the organic layers were successfully partitioned, they underwent a drying process utilizing  $\text{MgSO}_4$ . Subsequently, the solvent was removed under reduced pressure. The crude extract, upon dissolution in methanol at 10 mg/mL, underwent filtration through glass wool before undergoing testing via LCMS. The purification procedure necessitated a concentration of 50 mg/mL for the crude extract, achieved after cultivating transformants on a larger scale (1 liter) in preparation for the subsequent LCMS analysis.

Analytical LCMS data was generated using a Waters LCMS system comprising a Waters 2767 autosampler, a Waters 2545 pump, and a Phenomenex Kinetex column (2.6  $\mu\text{m}$ , C18, 100 Å, 4.6 x 100 mm) equipped with a Phenomenex Security Guard precolumn (Luna, C5, 300 Å). The solvent flow rate was maintained at 1.0 mL·min<sup>-1</sup>. For detection, two instruments were employed: a Waters ZQ mass detector, capable of functioning in both ES<sup>+</sup> and ES<sup>-</sup> modes, encompassing a mass range of 100 to 1000 m/z, and a 996 Diode Array detector offering a wavelength range spanning 210 to 600 nm. In this study, the HPLC system employed two solvents: Acetonitrile (B) containing 0.045 % formic acid, and water (A) supplemented with an additional 0.05 % formic acid, effectively ensuring optimal separation and detection conditions.

The purification of all compounds was executed employing a Waters mass-directed autopurification system, comprising a Waters 2767 autosampler, Binary Gradient Module 2545 with 515 HPLC pumps, and System Fluid Organiser. For this process, a Phenomenex Kinetex Axia column (5  $\mu\text{m}$ , C18, 100 Å, 21.2 x 250 mm), coupled with a Security Guard pre-column (Luna C5 300 Å), was utilized. The elution of compounds transpired at a flow rate of 20 mL·min<sup>-1</sup>, maintaining ambient temperature conditions. Fraction collection was facilitated by the Waters Sample Manager 2767 instrument, which triggered fractions either through mass-directed or time-dependent triggers. The fractions derived from the mixture were initially subjected to vacuum evaporation to eliminate organic solvents. Following this, the resultant aqueous phases underwent drying, employing Freeze Dryers and/or a rotary evaporator. The desiccated samples were weighed, dissolved, and subsequently subjected to HPLC analysis, prior to their submission for nuclear magnetic resonance (NMR) analysis.

### 1.6.1 Presence of 6 in experiment 1

LCMS data from experiment 1 was examined for the presence of **6** *via* the extracted ion chromatogram. Compound **6** was clearly observed in both ES<sup>+</sup> and ES<sup>-</sup> data.

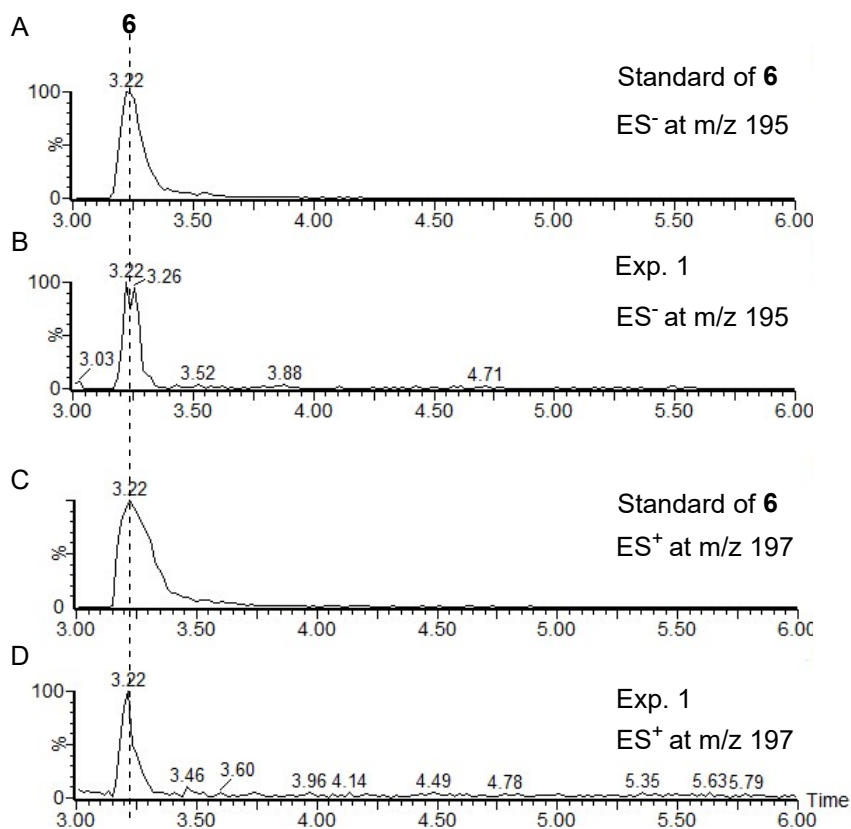

**Figure S1.16.** **A**, the mass of standard **6** scanned by ES<sup>-</sup> at m/z 195; **B**, the mass of **6** from exp.1 scanned by ES<sup>-</sup> at m/z 195; **C**, the mass of standard **6** scanned by ES<sup>+</sup> at m/z 197; **D**, the mass of **6** from exp.1 scanned by ES<sup>+</sup> at m/z 197



## 2. Compound Characterization

### Compound 5

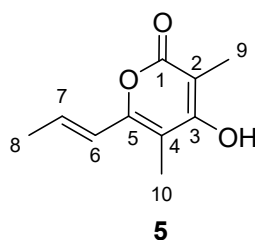

Chemical Formula: C<sub>10</sub>H<sub>12</sub>O<sub>3</sub>

Exact Mass: 180.0786

| Compound 5 |                  |                                      |                                     |            |                                             |                                                    |
|------------|------------------|--------------------------------------|-------------------------------------|------------|---------------------------------------------|----------------------------------------------------|
| Pos.       | $\delta_c$ / ppm | $\delta_H$ / ppm (J/Hz)              | <sup>1</sup> H- <sup>1</sup> H COSY | HMBC (H-C) | $\delta_c$ / ppm literature <sup>[11]</sup> | $\delta_H$ / ppm (J/Hz) literature <sup>[11]</sup> |
| <b>1</b>   | 167.6            |                                      |                                     |            | 163.6                                       |                                                    |
| <b>2</b>   | 99.9             |                                      |                                     |            | 99.0                                        |                                                    |
| <b>3</b>   | 167.8            |                                      |                                     |            | 164.3                                       |                                                    |
| <b>4</b>   | 108.6            |                                      |                                     |            | 106.3                                       |                                                    |
| <b>5</b>   | 153.5            |                                      |                                     |            | 151.6                                       |                                                    |
| <b>6</b>   | 121.4            | 6.41, 1H, dddd (15.3, 1.7, 1.7, 1.7) | 7, 8                                | 5, 8       | 120.6                                       | 6.42, dq (15.4, 1.3)                               |
| <b>7</b>   | 134.2            | 6.6, 1H, dddd (15.4, 6.9, 6.9, 6.9)  | 6, 8                                | 5, 8       | 132.0                                       | 6.50, dq (15.4, 6.0)                               |
| <b>8</b>   | 18.6             | 1.92, 3H, m                          | 6, 7                                | 6, 7       | 17.6                                        | 1.90, d (6.0)                                      |
| <b>9</b>   | 9.0              | 1.92, 3H, m                          |                                     | 1, 2, 3    | 8.6                                         | 1.94, s                                            |
| <b>10</b>  | 9.4              | 2.0, 3H, s                           |                                     | 3, 4, 5    | 8.4                                         | 2.01, s                                            |

**Table S2.1** Summarized NMR signals for <sup>13</sup>C, <sup>1</sup>H, <sup>1</sup>H-<sup>1</sup>H COSY, HMBC for **5** recorded in CD<sub>3</sub>OD. Literature <sup>[11]</sup> data was measured in acetone-d<sub>6</sub>

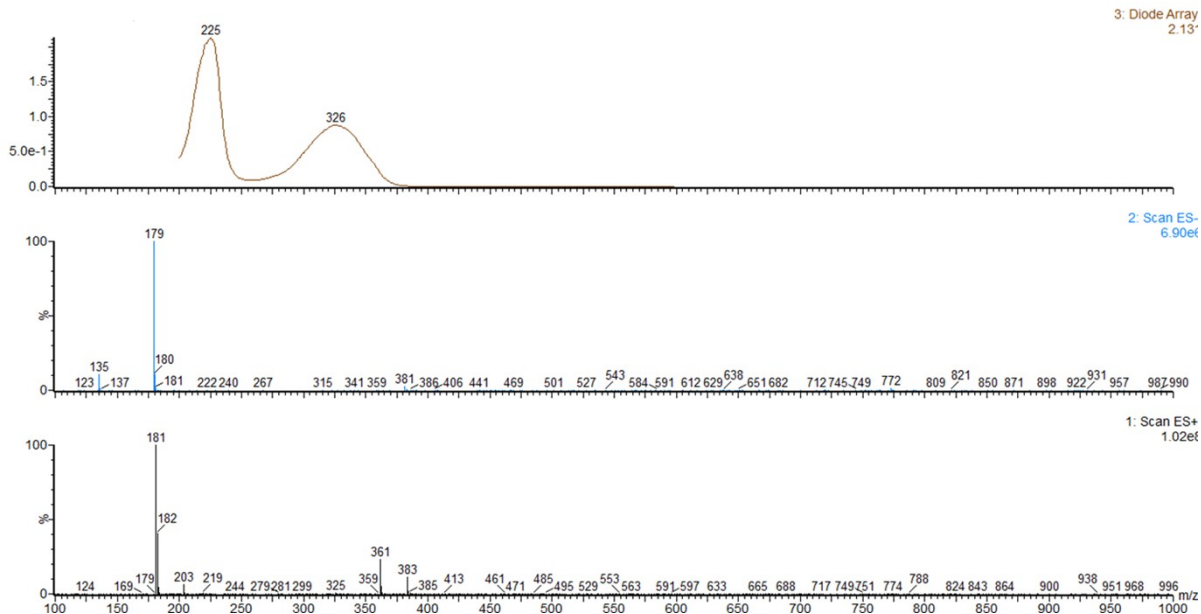

Figure S2.1 UV-absorption (top) and fragmentation pattern of 5 in ES<sup>-</sup> (middle) and ES<sup>+</sup> TIC (bottom) by LR-LCMS

## Elemental Composition Report

Page 1

### Single Mass Analysis

Tolerance = 20.0 PPM / DBE: min = -1.5, max = 50.0

Element prediction: Off

Number of isotope peaks used for i-FIT = 3

Monoisotopic Mass, Even Electron Ions

38 formula(e) evaluated with 2 results within limits (all results (up to 1000) for each mass)

Elements Used:

C: 0-30 H: 0-50 O: 0-8 Na: 0-1

Sun

QToF Premier HAB321

YS 006 256 (2.620) AM (Cen,4, 90.00, Ht,10000.0,556.28,0.70,LS 10)

1: TOF MS ES+  
1.64e+002

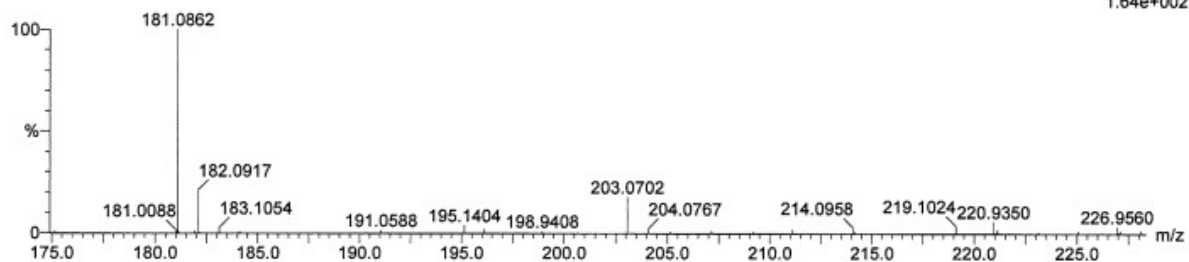

Minimum: -1.5  
Maximum: 5.0 20.0 50.0

| Mass     | Calc. Mass | mDa  | PPM  | DBE | i-FIT | i-FIT (Norm) | Formula      |
|----------|------------|------|------|-----|-------|--------------|--------------|
| 181.0862 | 181.0865   | -0.3 | -1.7 | 4.5 | 12.0  | 0.2          | C10 H13 O3   |
|          | 181.0841   | 2.1  | 11.6 | 1.5 | 13.6  | 1.8          | C8 H14 O3 Na |

Figure 2.2 HRMS data for 5;  $m/z$  (M+H)<sup>+</sup> calc. mass is 181.0865, 181.0862 was found.

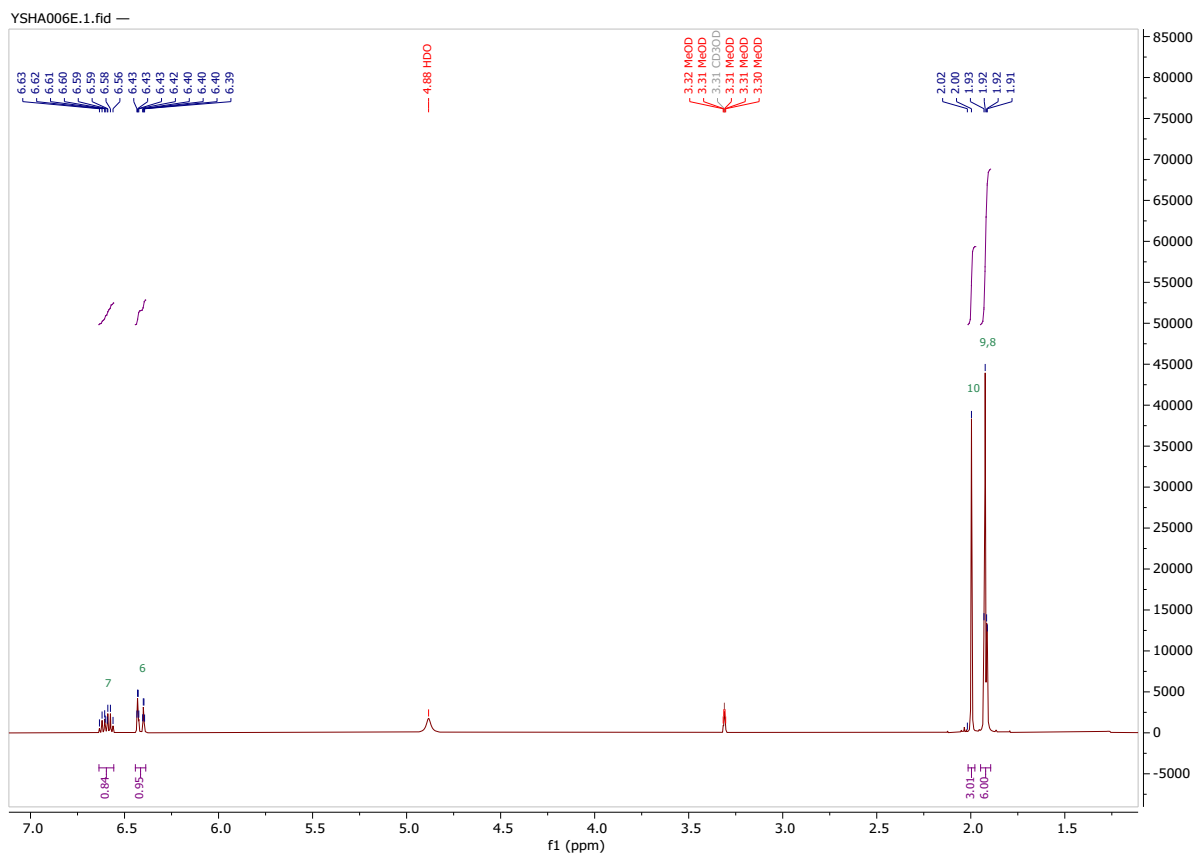

Figure S2.3 <sup>1</sup>H-NMR of **5** recorded at 500 MHz in CD<sub>3</sub>OD

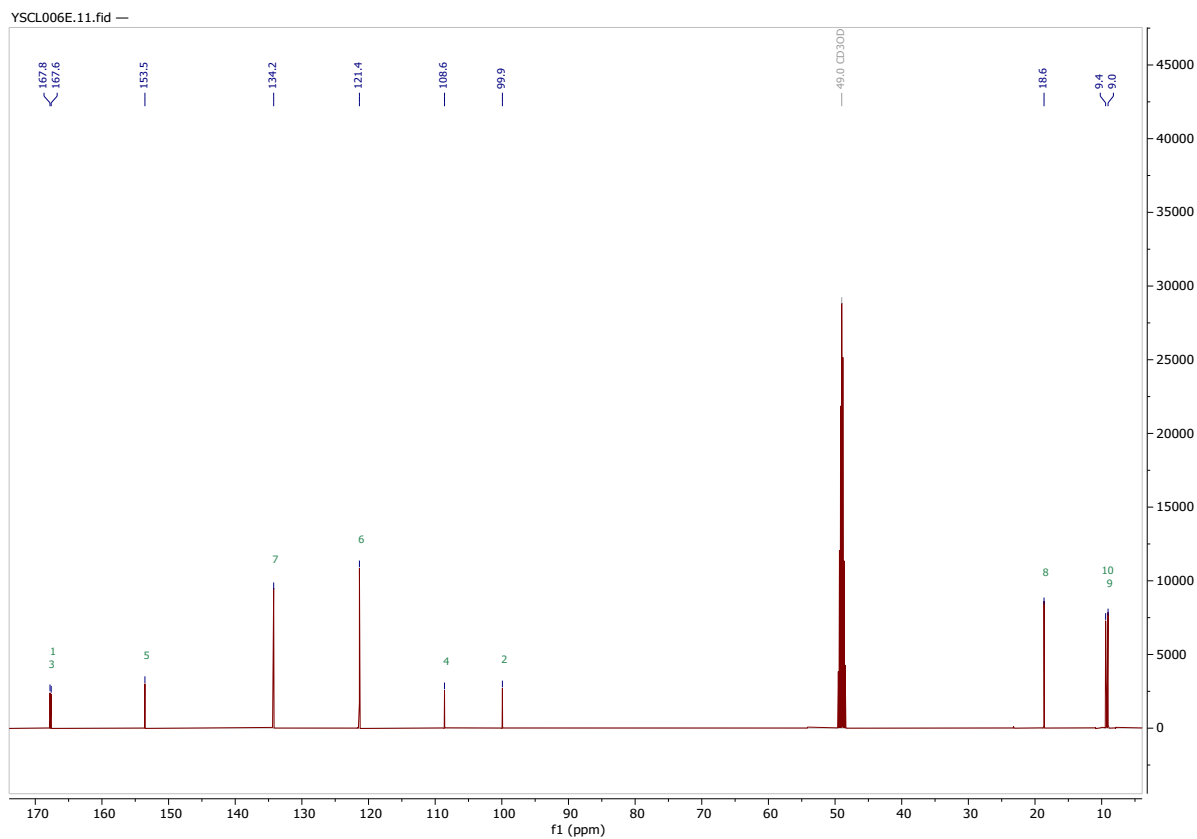

Figure S2.4 <sup>13</sup>C-NMR of **5** recorded at 125 MHz in CD<sub>3</sub>OD

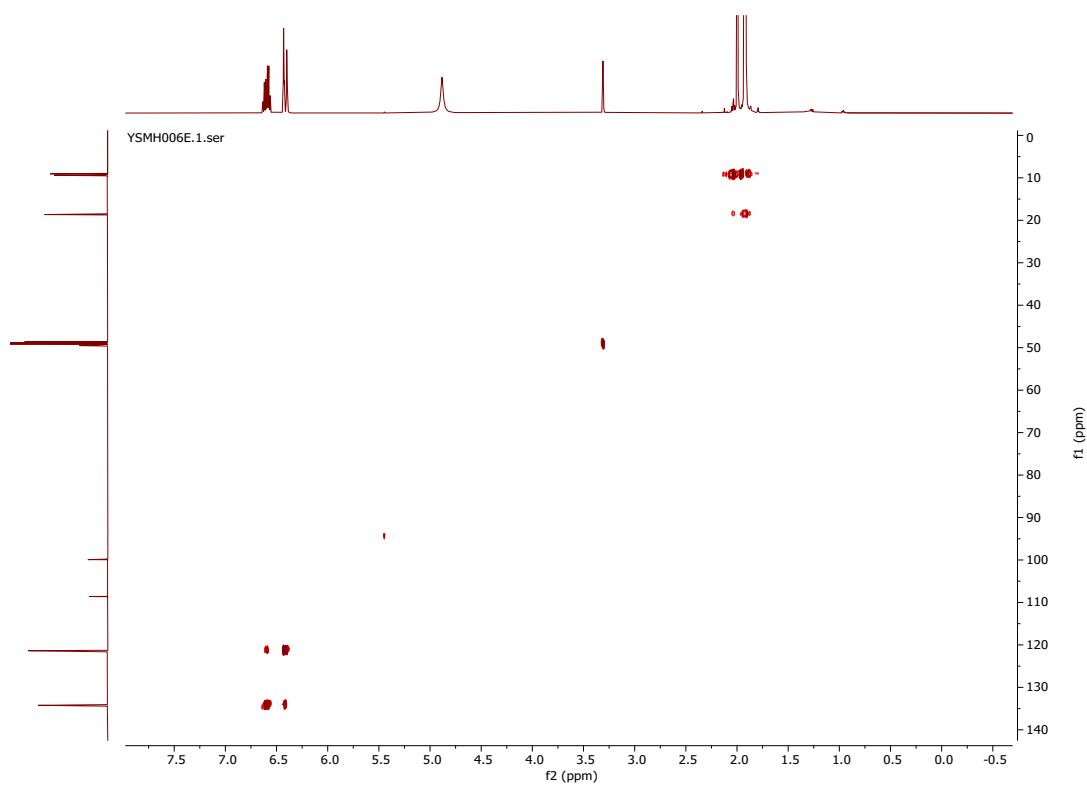

Figure S2.5 HSQC-spectrum of **5** recorded at 500, 125 MHz in CD<sub>3</sub>OD

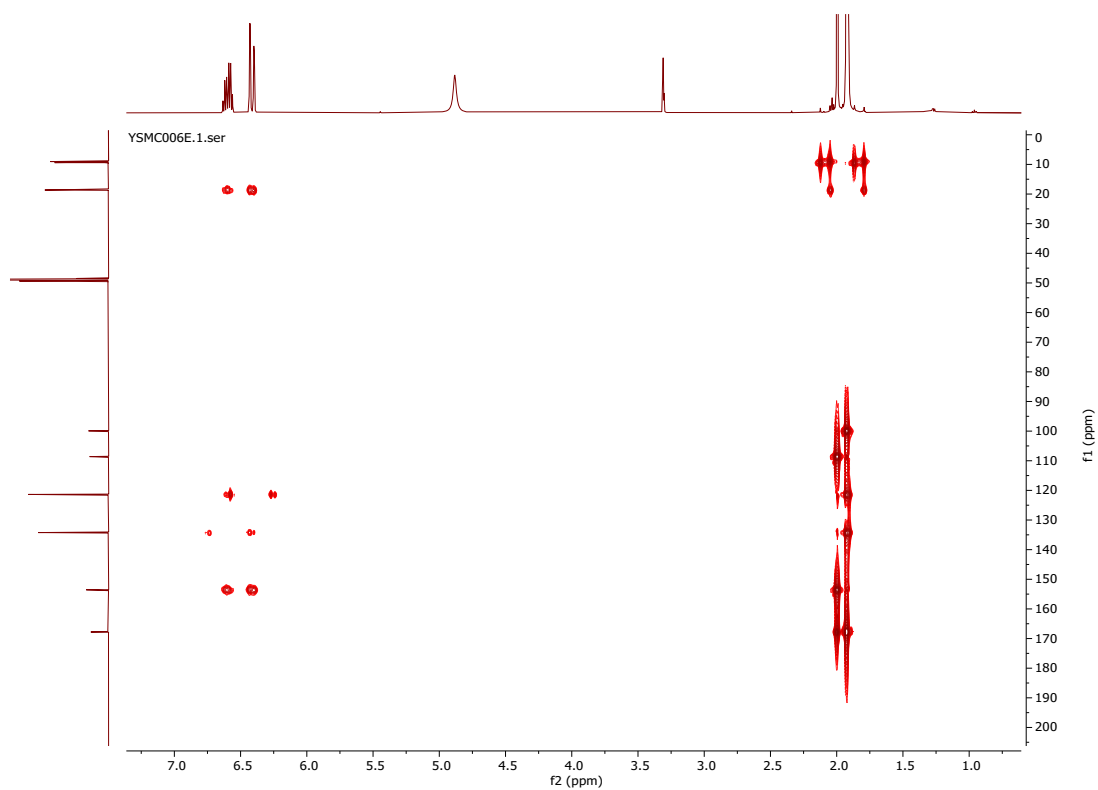

Figure S2.6 HMBC-spectrum of **5** recorded at 500, 125 MHz in CD<sub>3</sub>OD

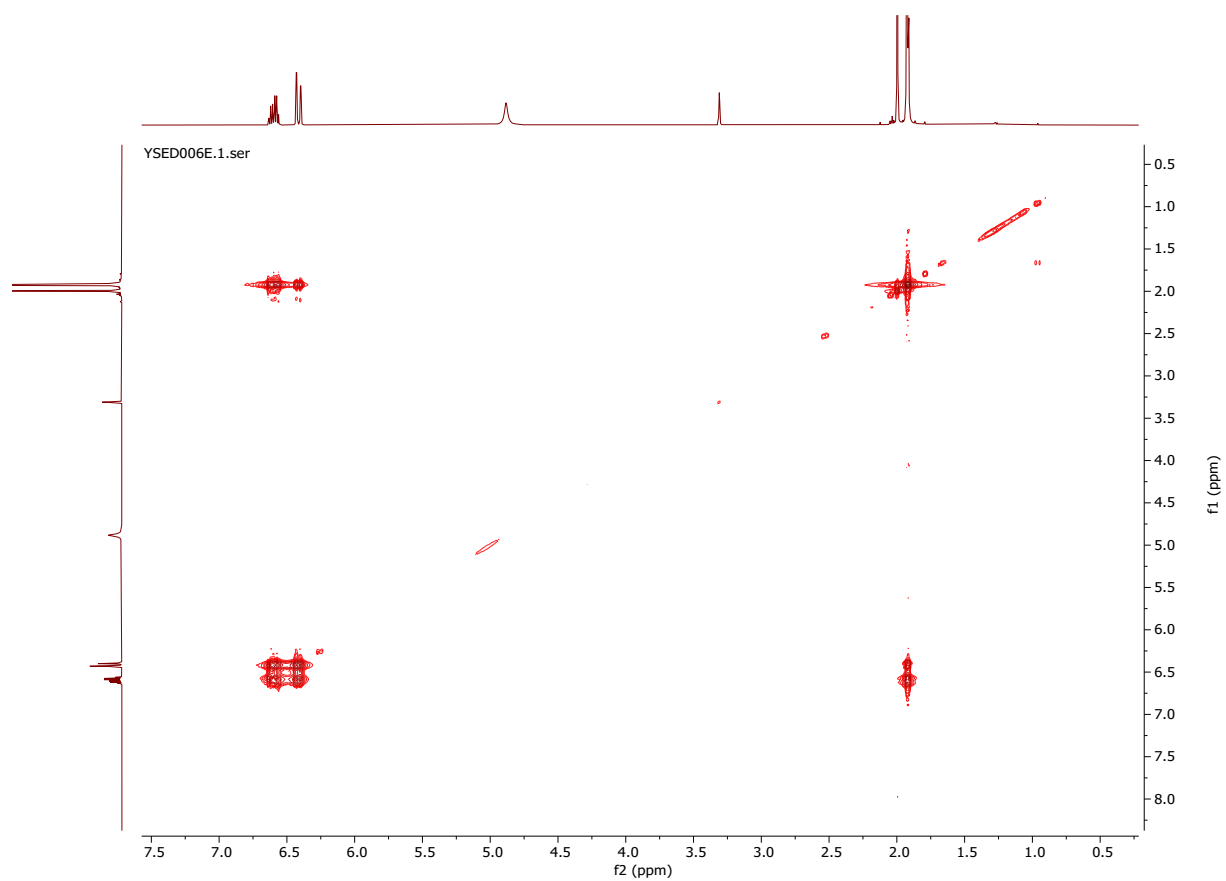

**Figure S2.7**  $^1\text{H}$ ,  $^1\text{H}$ -COSY-spectrum of **5** recorded at 500 MHz in  $\text{CD}_3\text{OD}$

## Compound 6

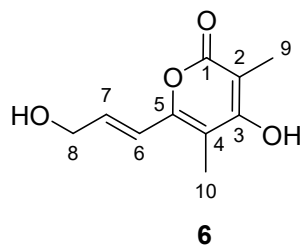

Chemical Formula: C<sub>10</sub>H<sub>12</sub>O<sub>4</sub>  
Exact Mass: 196.0736

| Compound 6 |                  |                         |                                     |            |
|------------|------------------|-------------------------|-------------------------------------|------------|
| Pos.       | $\delta_c$ / ppm | $\delta_H$ / ppm (J/Hz) | <sup>1</sup> H- <sup>1</sup> H COSY | HMBC (H-C) |
| 1          | 168.1            |                         |                                     |            |
| 2          | 100.3            |                         |                                     |            |
| 3          | 167.5            |                         |                                     |            |
| 4          | 110.1            |                         |                                     |            |
| 5          | 153.1            |                         |                                     |            |
| 6          | 118.8            | 6.65, 1H, m             | 7, 8                                | 5, 7, 8    |
| 7          | 137.4            | 6.65, 1H, m             | 6, 8                                | 5, 6, 8    |
| 8          | 62.7             | 4.29, 2H, d (2.9)       | 6, 7                                | 5, 6, 7    |
| 9          | 9.1              | 1.94, 3H, s             |                                     | 1, 2, 3    |
| 10         | 9.5              | 2.03, 3H, s             |                                     | 3, 4, 5    |

Table S2.2 Summarized NMR signals for <sup>13</sup>C, <sup>1</sup>H, <sup>1</sup>H-<sup>1</sup>H COSY, HMBC for 6 recorded in CD<sub>3</sub>OD.

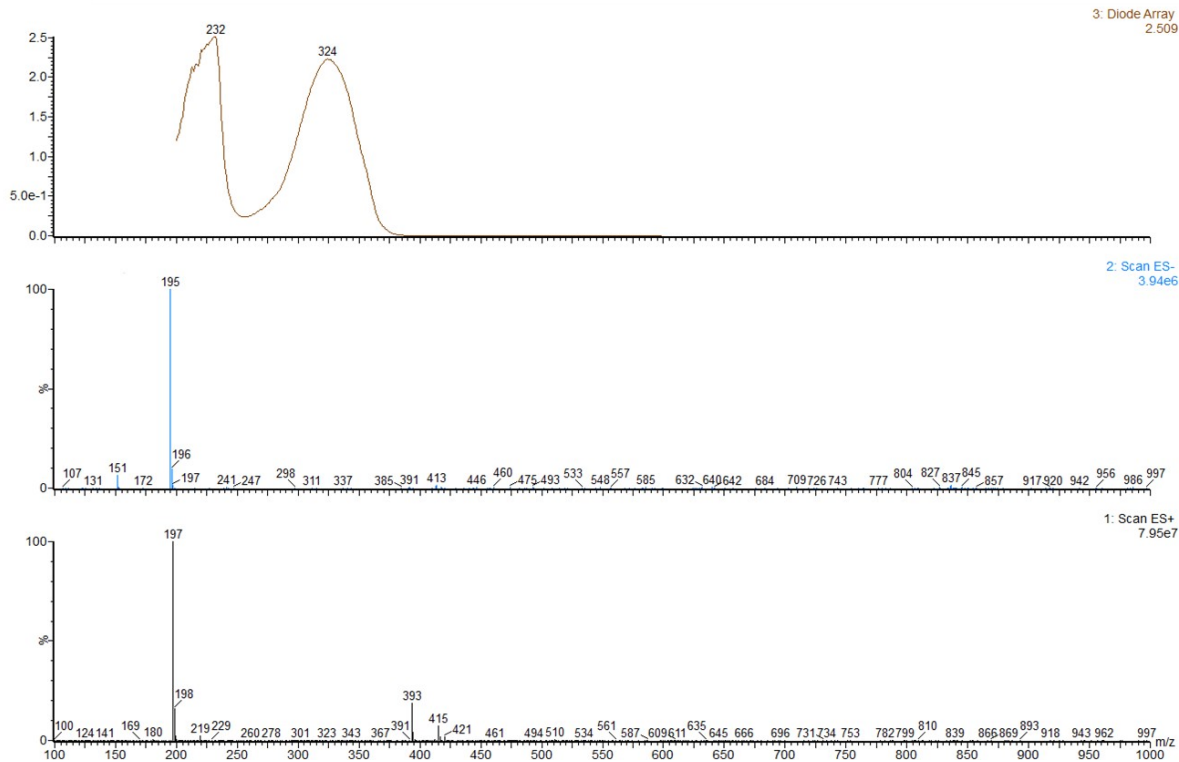

Figure S2.8 UV-absorption (top) and fragmentation pattern of **6** in ES<sup>-</sup> (middle) and ES<sup>+</sup> TIC (bottom) by LR-LCMS

## Elemental Composition Report

Page 1

### Single Mass Analysis

Tolerance = 20.0 PPM / DBE: min = -1.5, max = 50.0

Element prediction: Off

Number of isotope peaks used for i-FIT = 3

Monoisotopic Mass, Even Electron Ions

199 formula(e) evaluated with 3 results within limits (up to 50 closest results for each mass)

Elements Used:

C: 0-100 H: 0-160 N: 0-10 O: 0-10

Sun

QToF Premier HAB321

YS005 376 (3.836) AM (Cen,4, 70.00, Ht,10000.0,556.28,0.70,LS 10)

1: TOF MS ES+  
2.50e+002

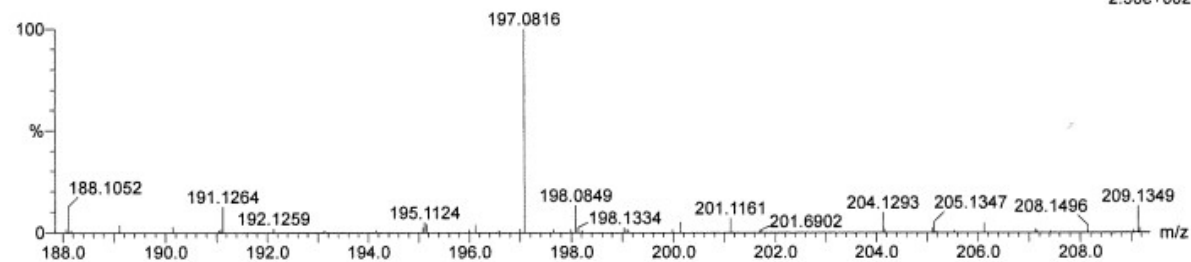

Minimum:

Maximum: 5.0 20.0 -1.5

| Mass     | Calc. Mass | mDa  | PPM  | DBE | i-FIT | i-FIT (Norm) | Formula     |
|----------|------------|------|------|-----|-------|--------------|-------------|
| 197.0816 | 197.0814   | 0.2  | 1.0  | 4.5 | 24.9  | 0.8          | C10 H13 O4  |
|          | 197.0827   | -1.1 | -5.6 | 9.5 | 24.9  | 0.9          | C11 H9 N4   |
|          | 197.0787   | 2.9  | 14.7 | 5.5 | 26.0  | 2.0          | C6 H9 N6 O2 |

Figure S2.9 HRMS data for **6**;  $m/z$  (M+H)<sup>+</sup> calc. mass is 197.0814, 197.0816 was found.

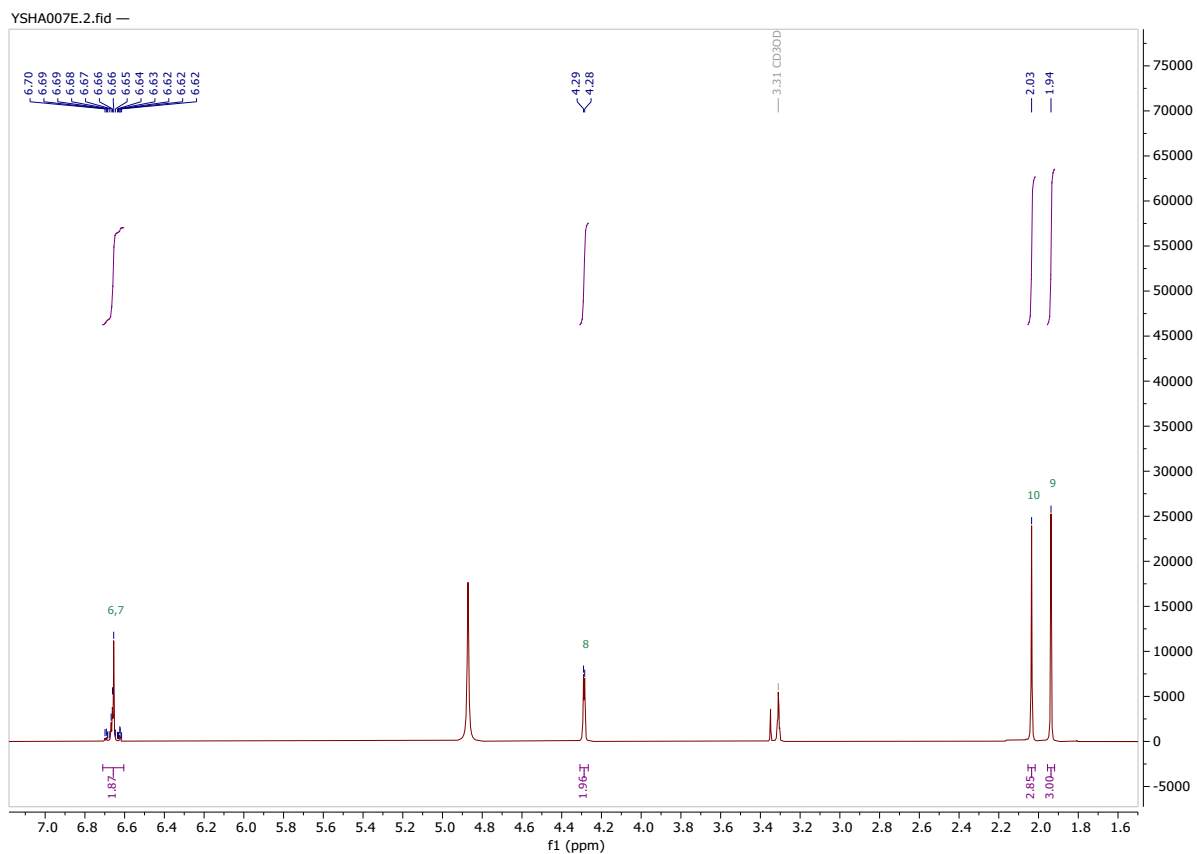

Figure S2.10  $^1\text{H}$ -NMR of **6** recorded at 500 MHz in  $\text{CD}_3\text{OD}$

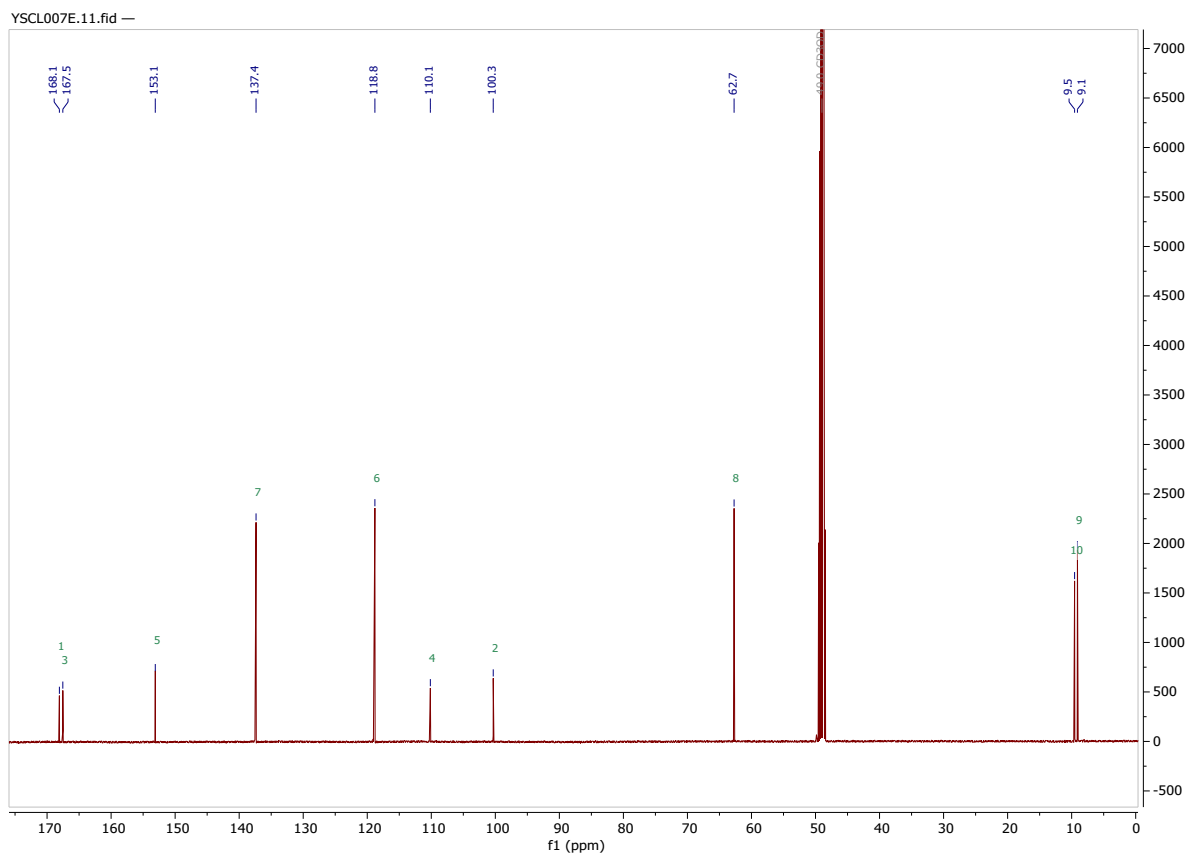

Figure S2.11  $^{13}\text{C}$ -NMR of **6** recorded at 125 MHz in  $\text{CD}_3\text{OD}$



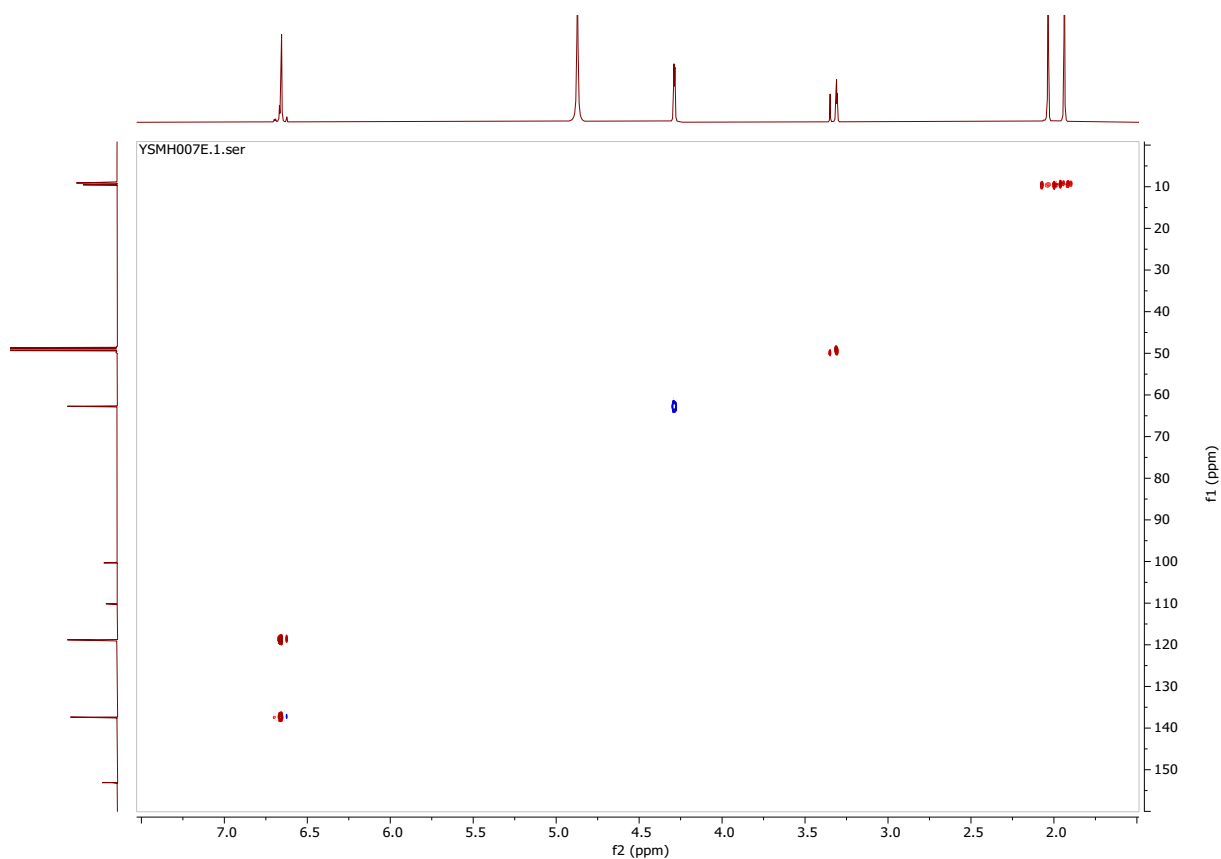

Figure S2.12 HSQC-spectrum of **6** recorded at 500, 125 MHz in CD<sub>3</sub>OD

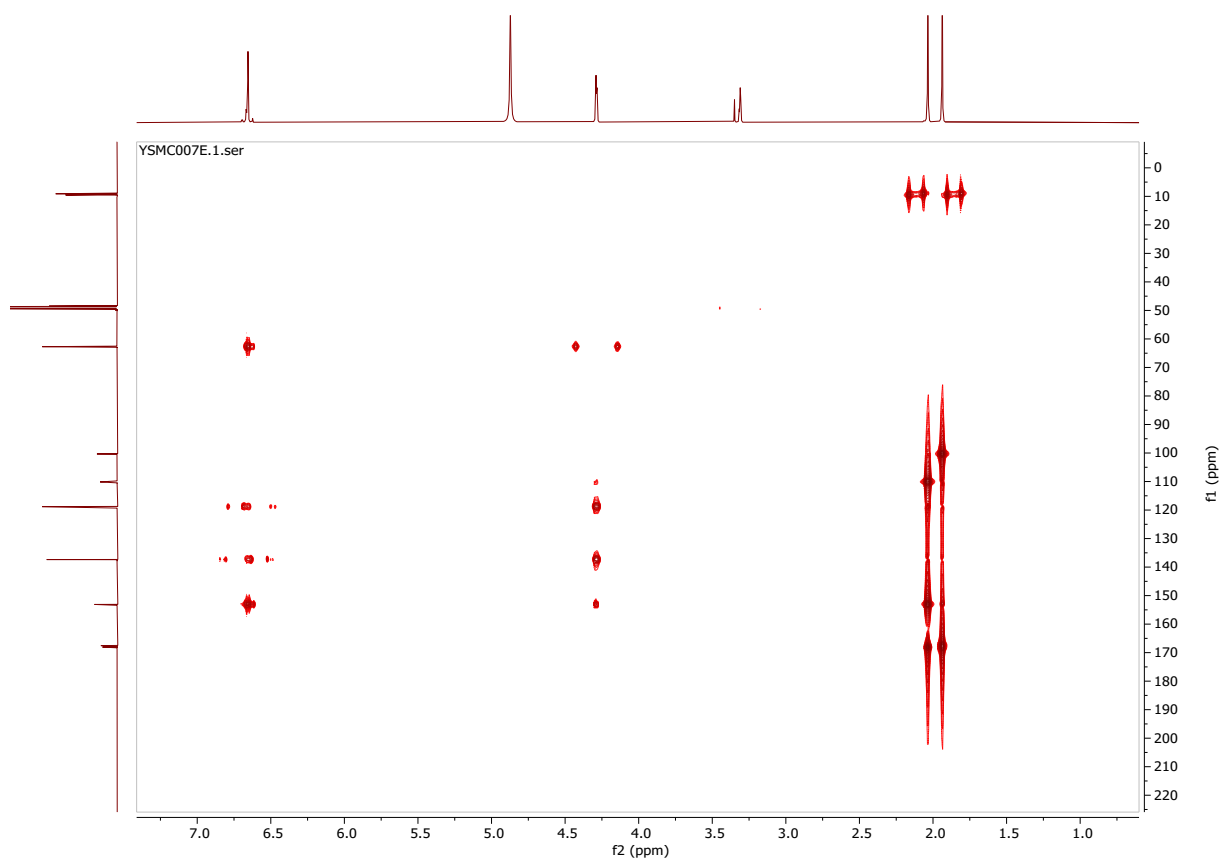

Figure S2.13 HMBC-spectrum of **6** recorded at 500, 125 MHz in CD<sub>3</sub>OD

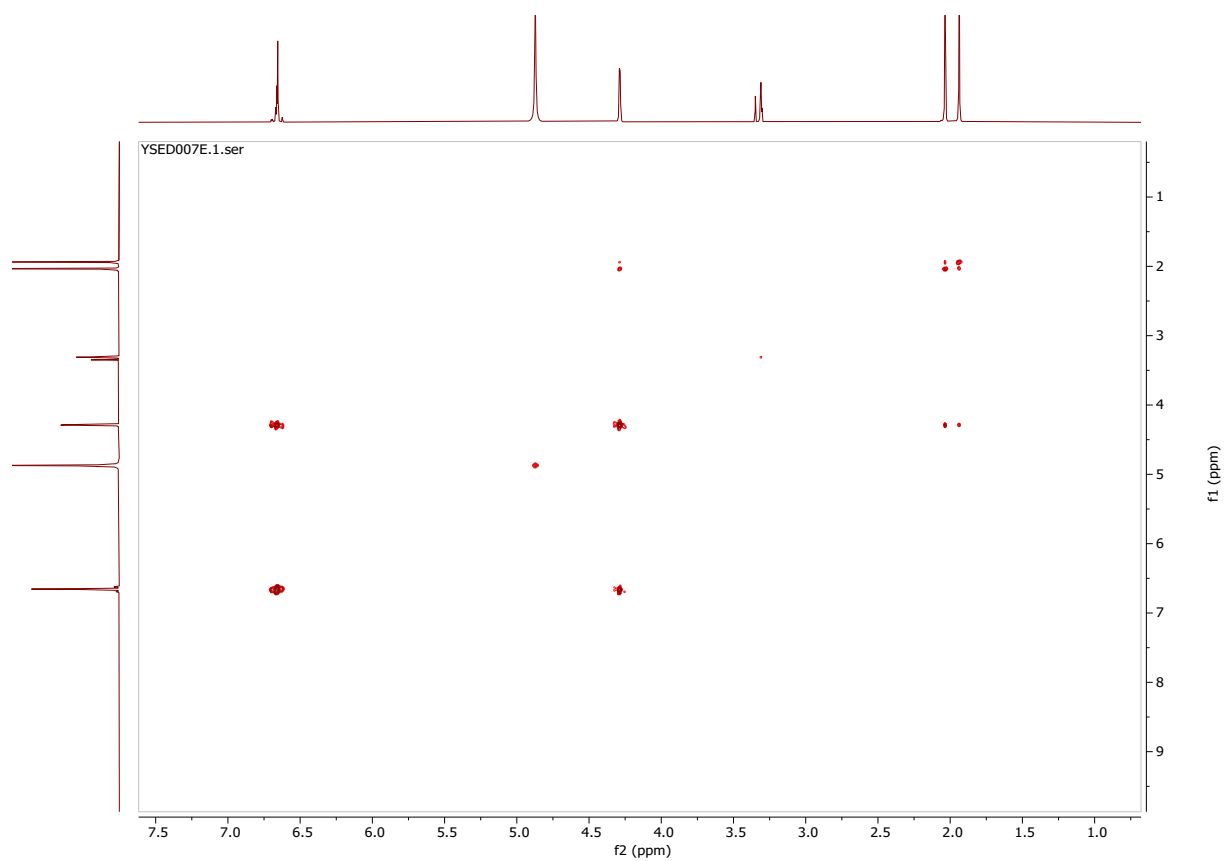

**Figure S2.14**  $^1\text{H}$ ,  $^1\text{H}$ -COSY-spectrum of **6** recorded at 500 MHz in  $\text{CD}_3\text{OD}$

## Compound 7

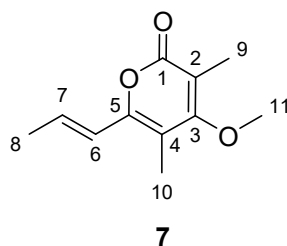

Chemical Formula: C<sub>11</sub>H<sub>14</sub>O<sub>3</sub>

Exact Mass: 194.0943

| Compound 7 |                  |                                          |                                     |            |                                             |                                                    |
|------------|------------------|------------------------------------------|-------------------------------------|------------|---------------------------------------------|----------------------------------------------------|
| Pos.       | $\delta_c$ / ppm | $\delta_H$ / ppm (J/Hz)                  | <sup>1</sup> H- <sup>1</sup> H COSY | HMBC (H-C) | $\delta_c$ / ppm literature <sup>[11]</sup> | $\delta_H$ / ppm (J/Hz) literature <sup>[11]</sup> |
| 1          | 167.4            |                                          |                                     |            | 164.5                                       |                                                    |
| 2          | 110.7            |                                          |                                     |            | 111.2                                       |                                                    |
| 3          | 170.7            |                                          |                                     |            | 168.7                                       |                                                    |
| 4          | 111.1            |                                          |                                     |            | 109.4                                       |                                                    |
| 5          | 154.0            |                                          |                                     |            | 153.0                                       |                                                    |
| 6          | 121.3            | 6.41, 1H, dddd (15.30, 1.71, 1.71, 1.69) | 7, 8                                | 5, 8       | 121.4                                       | 6.42, dq (15.4, 1.3)                               |
| 7          | 134.5            | 6.61, 1H, dddd (15.41, 6.92, 6.92, 6.90) | 6, 8                                | 5, 8       | 133.1                                       | 6.51, dq (15.4, 6.5)                               |
| 8          | 18.7             | 1.93, 3H, dd (7.0, 1.7)                  | 7, 6                                | 6, 7       | 18.6                                        | 1.91, d (6.5)                                      |
| 9          | 10.3             | 2.01, 3H, s                              |                                     | 1, 2, 3    | 10.4                                        | 1.96, s                                            |
| 10         | 9.6              | 2.0, 3H, s                               |                                     | 3, 4, 5    | 9.5                                         | 1.98, s                                            |
| 11         | 61.1             | 3.85, 3H, s                              |                                     | 3          | 60.7                                        | 3.83, s                                            |

**Table S2.3** Summarized NMR signals for <sup>13</sup>C, <sup>1</sup>H, <sup>1</sup>H-<sup>1</sup>H COSY, HMBC for **7** recorded in CD<sub>3</sub>OD. Literature <sup>[11]</sup> data was measured in acetone-d<sub>6</sub>

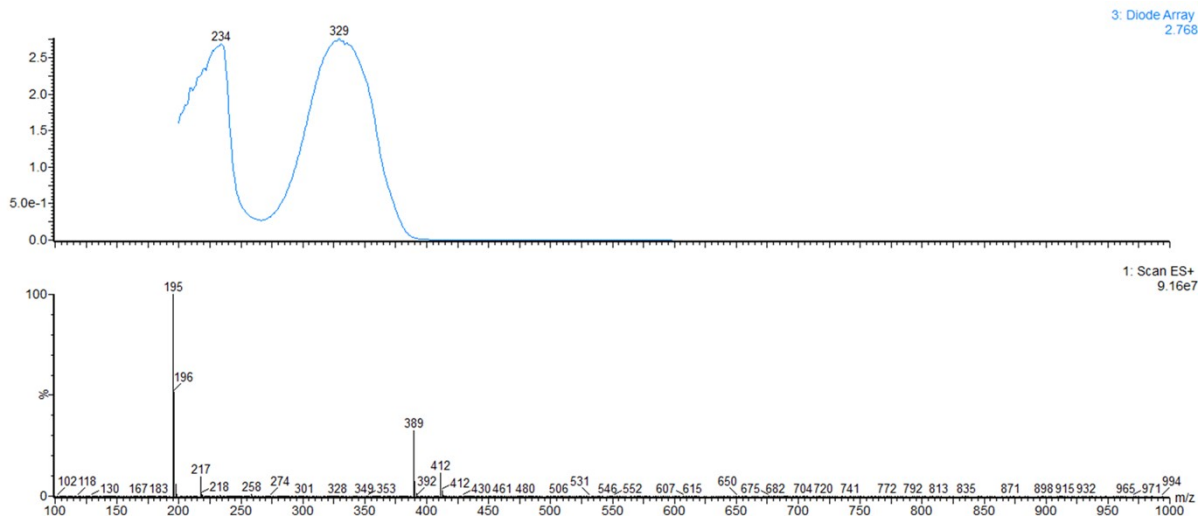

Figure S2.15 UV-absorption (top) and fragmentation pattern of 7 in ES<sup>+</sup> TIC (bottom) by LR-LCMS

## Elemental Composition Report

Page 1

### Single Mass Analysis

Tolerance = 20.0 PPM / DBE: min = -1.5, max = 50.0

Element prediction: Off

Number of isotope peaks used for i-FIT = 3

Monoisotopic Mass, Even Electron Ions

197 formula(e) evaluated with 3 results within limits (up to 50 closest results for each mass)

Elements Used:

C: 0-100 H: 0-160 N: 0-10 O: 0-10

Sun

QToF Premier HAB321

YS004 772 (7.880) AM (Cen.4, 70.00, Ht,10000.0,556.28,0.70,LS 10)

1: TOF MS ES+  
1.63e+002

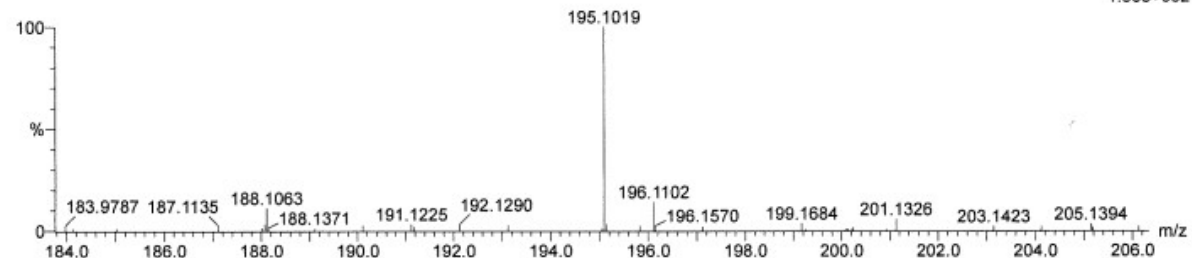

| Mass     | Calc. Mass | mDa  | PPM  | DBE | i-FIT | i-FIT (Norm) | Formula      |
|----------|------------|------|------|-----|-------|--------------|--------------|
| 195.1019 | 195.1021   | -0.2 | -1.0 | 4.5 | 16.6  | 0.2          | C11 H15 O3   |
|          | 195.0994   | 2.5  | 12.8 | 5.5 | 18.5  | 2.2          | C7 H11 N6 O  |
|          | 195.0981   | 3.8  | 19.5 | 0.5 | 19.3  | 2.9          | C6 H15 N2 O5 |

Figure S2.16 HRMS data for 7;  $m/z$  (M+H)<sup>+</sup> calc. mass is 195.1021, 195.1019 was found

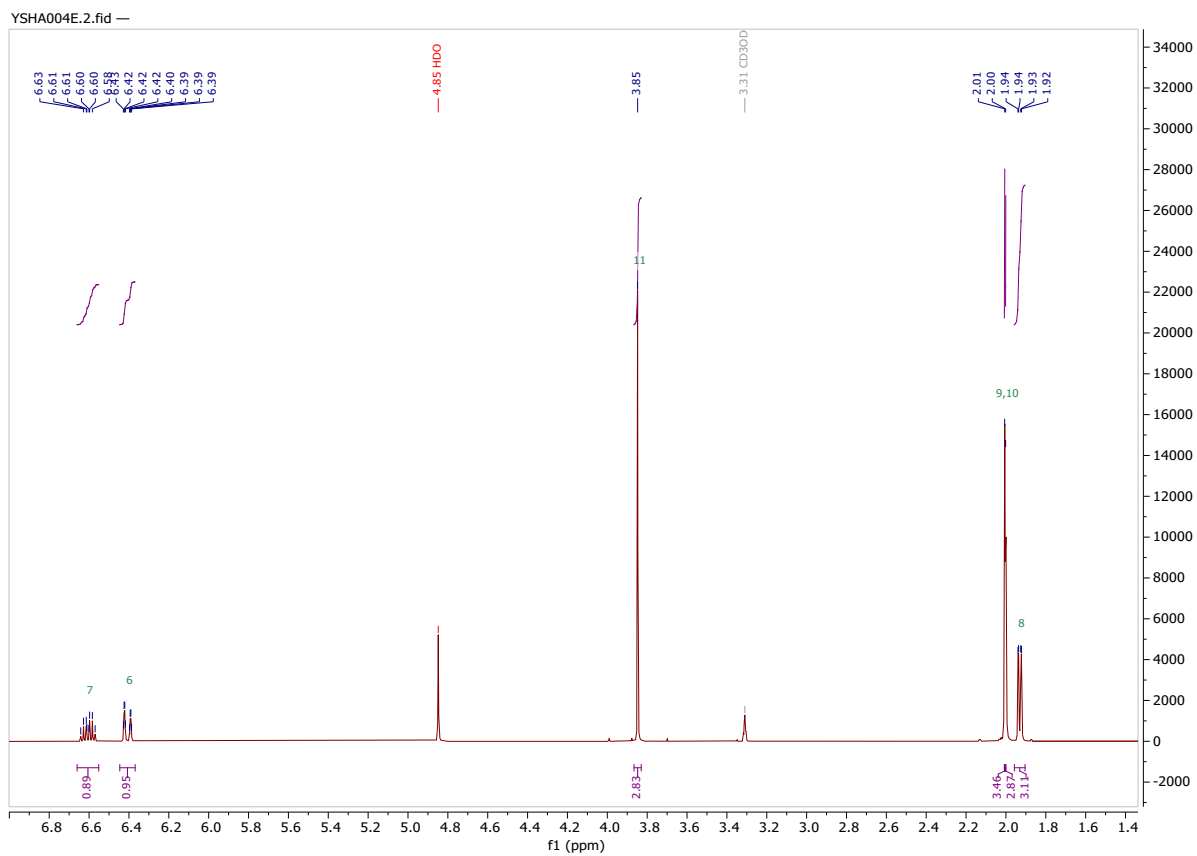

Figure S2.17  $^1\text{H}$ -NMR of **7** recorded at 500 MHz in  $\text{CD}_3\text{OD}$

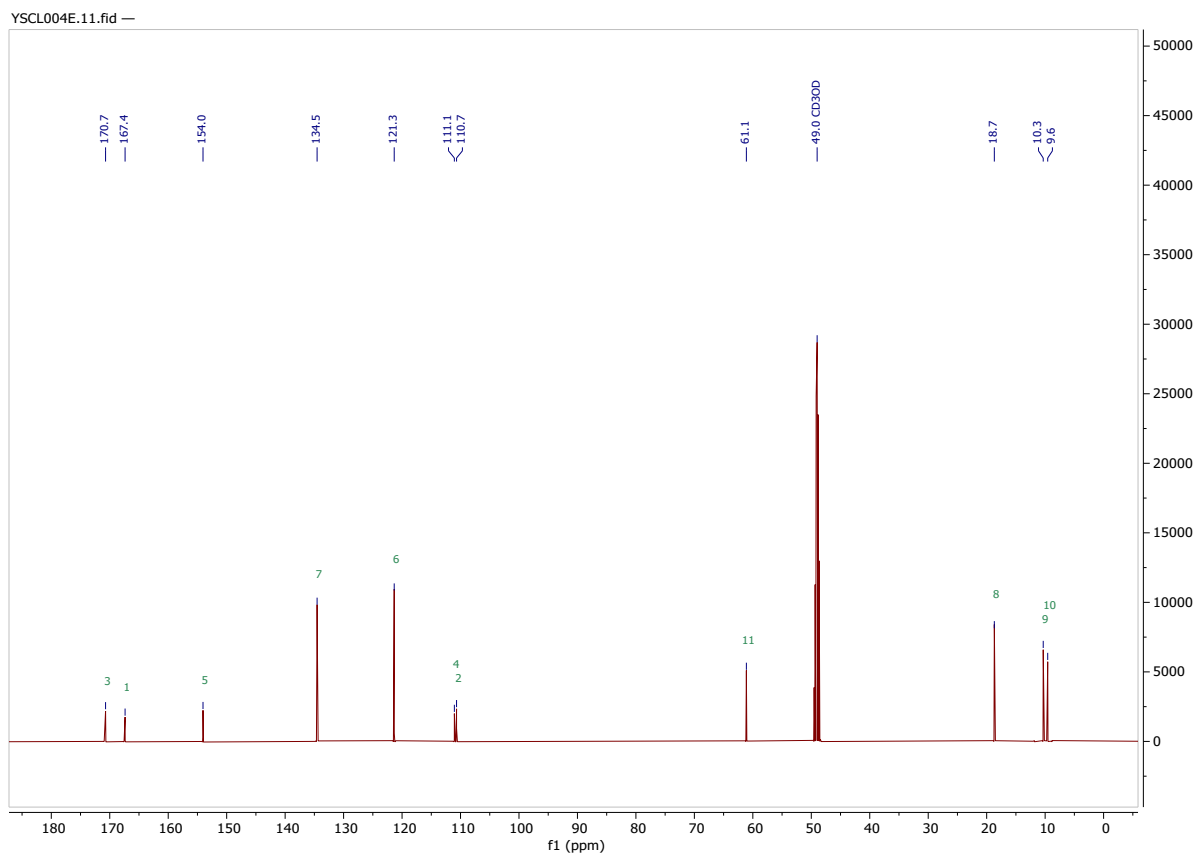

Figure S2.18  $^{13}\text{C}$ -NMR of **7** recorded at 125 MHz in  $\text{CD}_3\text{OD}$

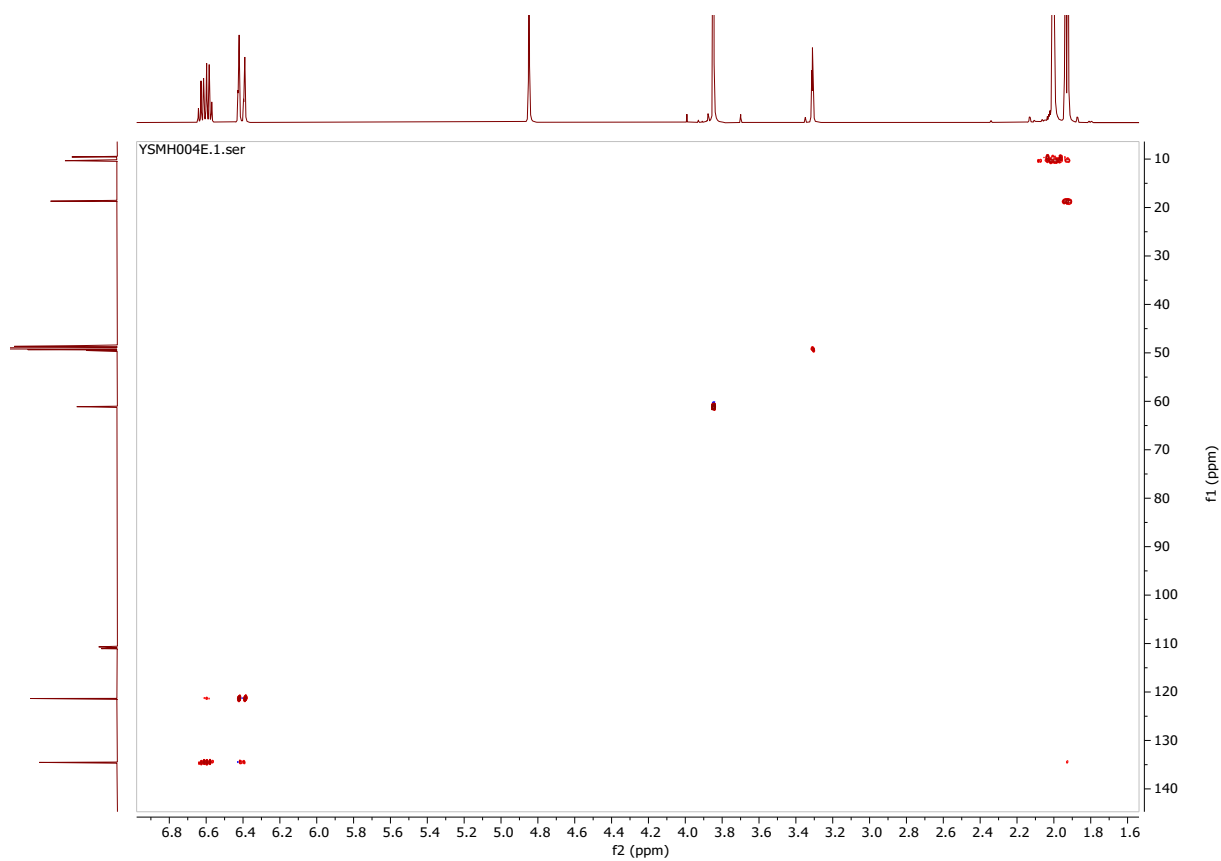

Figure S2.19 HSQC-spectrum of **7** recorded at 500, 125 MHz in CD<sub>3</sub>OD

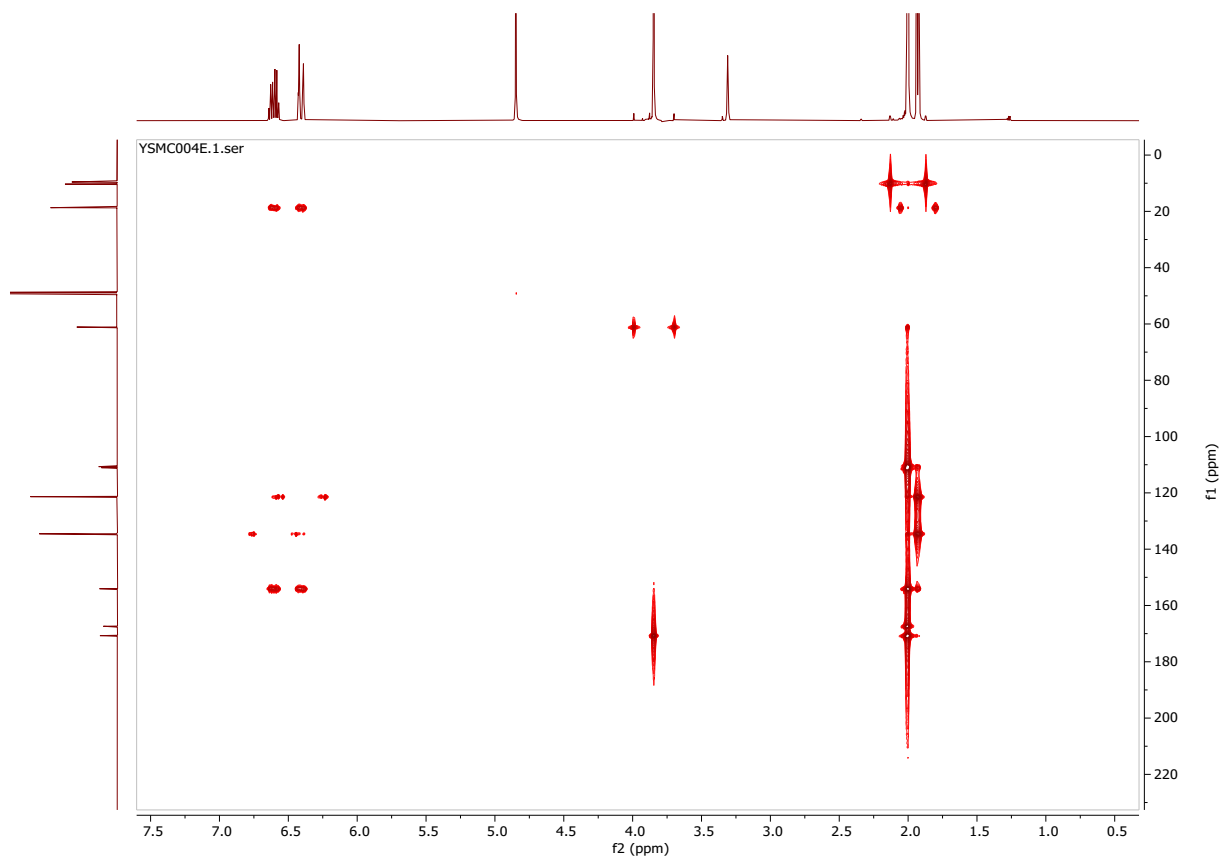

Figure S2.20 HMBC-spectrum of **7** recorded at 500, 125 MHz in CD<sub>3</sub>OD

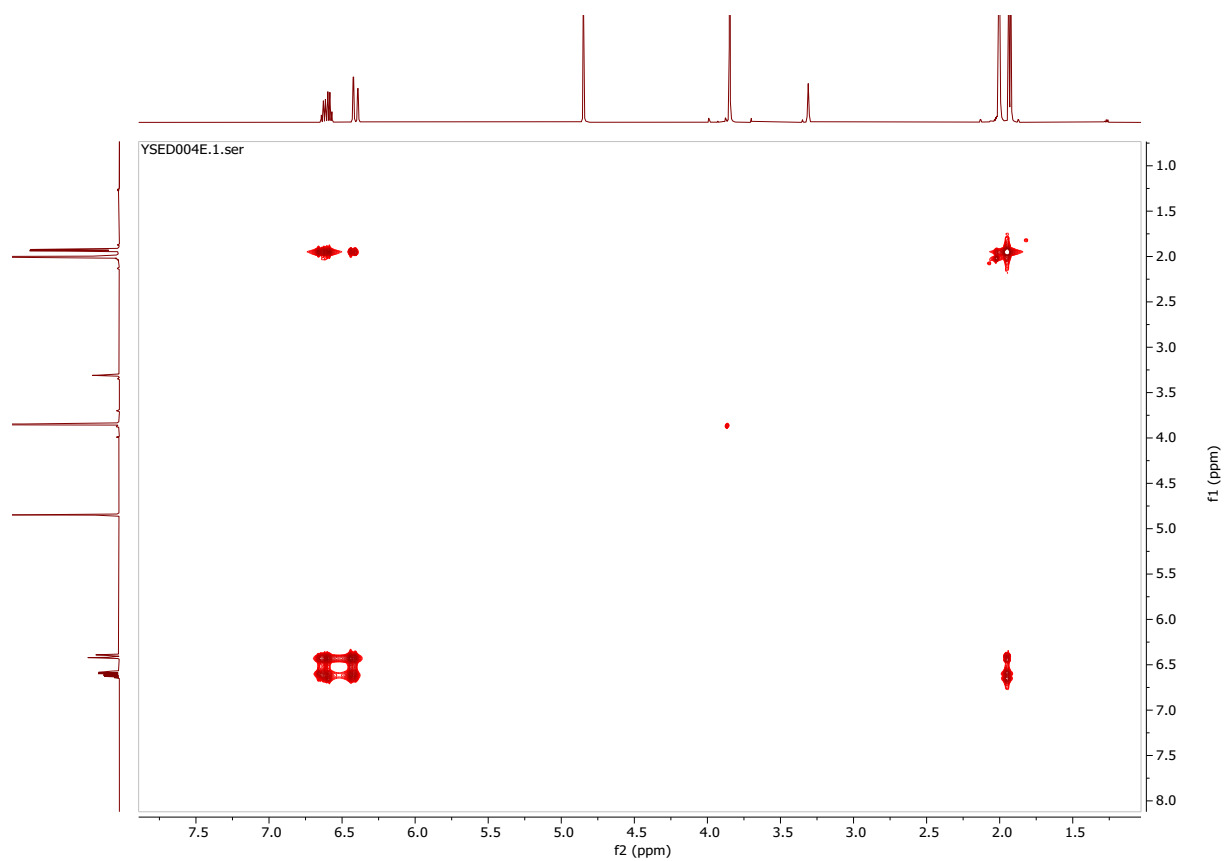

**Figure S2.21**  $^1\text{H}$ ,  $^1\text{H}$ -COSY-spectrum of **7** recorded at 500 MHz in  $\text{CD}_3\text{OD}$

## Compound 8

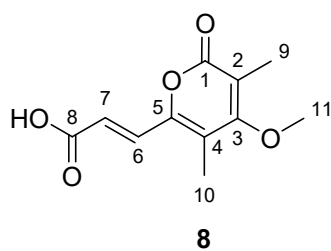

Chemical Formula: C<sub>11</sub>H<sub>12</sub>O<sub>5</sub>  
Exact Mass: 224.0685

| Compound 8 |                  |                         |                                     |            |
|------------|------------------|-------------------------|-------------------------------------|------------|
| Pos.       | $\delta_C$ / ppm | $\delta_H$ / ppm (J/Hz) | <sup>1</sup> H- <sup>1</sup> H COSY | HMBC (H-C) |
| 1          | 166.1            |                         |                                     |            |
| 2          | 115.1            |                         |                                     |            |
| 3          | 169.2            |                         |                                     |            |
| 4          | 118.1            |                         |                                     |            |
| 5          | 151.1            |                         |                                     |            |
| 6          | 124.6            | 6.55, 1H, d (15.3)      | 7                                   | 5          |
| 7          | 132.1            | 7.52, 1H, d (15.4)      | 6                                   | 5, 6, 8    |
| 8          | 169.6            |                         |                                     |            |
| 9          | 10.8             | 2.07, 3H, s             |                                     | 1, 2, 3    |
| 10         | 10.1             | 2.13, 3H, s             |                                     | 3, 4, 5    |
| 11         | 61.4             | 3.9, 3H, s              |                                     | 3          |

**Table S2.4** Summarized NMR signals for <sup>13</sup>C, <sup>1</sup>H, <sup>1</sup>H-<sup>1</sup>H COSY, HMBC for **8** recorded in CD<sub>3</sub>OD



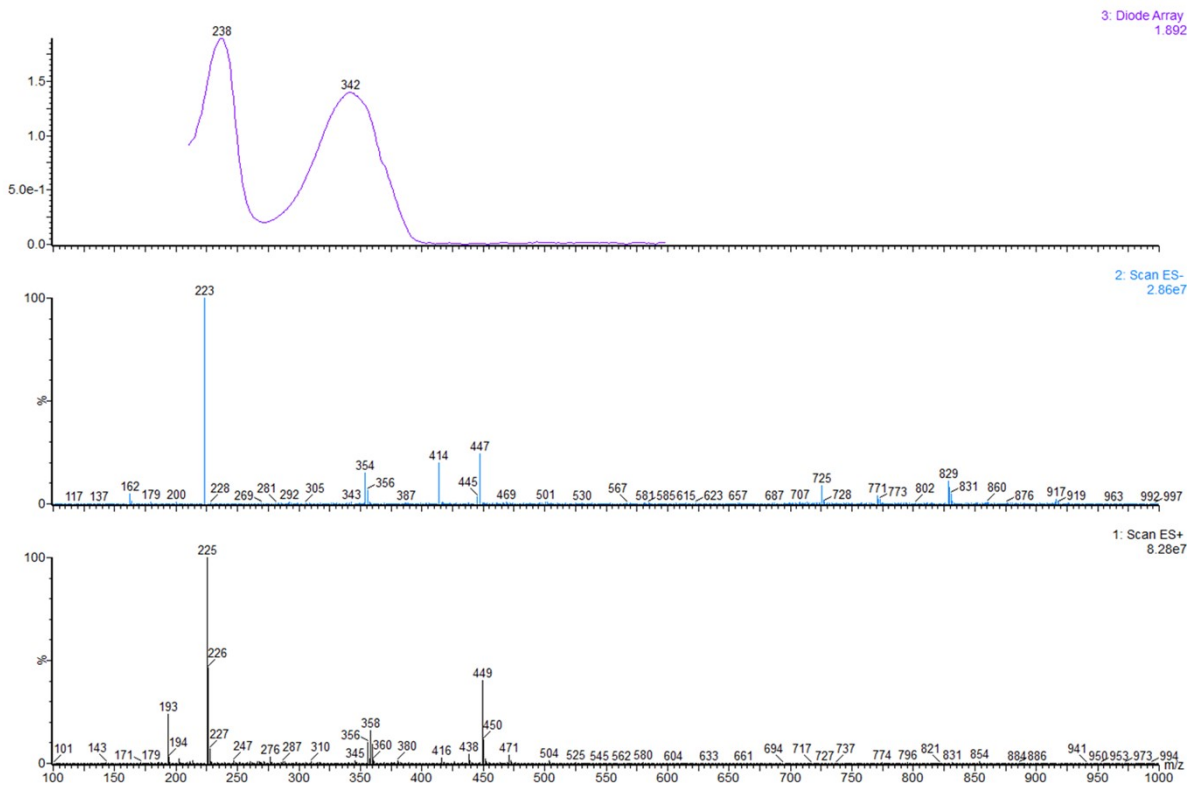

Figure S2.22 UV-absorption (top) and fragmentation pattern of **8** in ES<sup>-</sup> (middle) and ES<sup>+</sup> TIC (bottom) by LR-LCMS

## Elemental Composition Report

Page 1

### Single Mass Analysis (displaying only valid results)

Tolerance = 5.0 PPM / DBE: min = -1.5, max = 50.0

Selected filters: None

Monoisotopic Mass, Even Electron Ions

150 formula(e) evaluated with 1 results within limits (up to 40 closest results for each mass)

Elements Used:

C: 0-72 H: 0-50 N: 0-1 O: 0-6 Na: 0-1 S: 0-1

Sun

LCT Premier KD070

YS 009 24 (0.531) AM (Cen,4, 90.00, Ar,10000.0,554.26,0.70,LS 10)

1: TOF MS ES-  
685

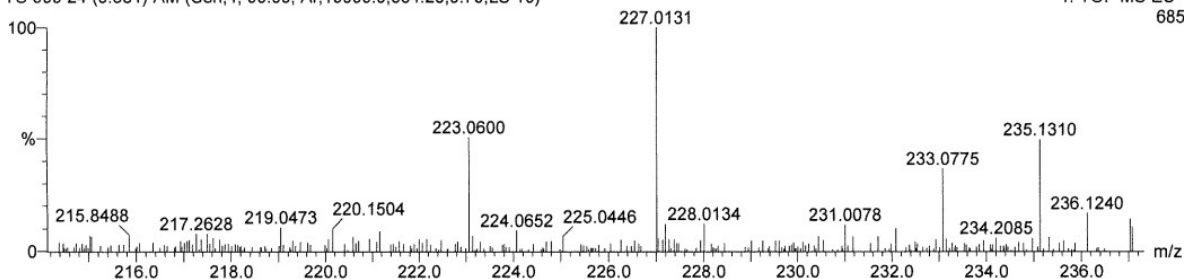

Minimum:

-1.5

Maximum:

5.0 5.0 50.0

| Mass     | Calc. Mass | mDa  | PPM  | DBE | i-FIT | Formula    |
|----------|------------|------|------|-----|-------|------------|
| 223.0600 | 223.0606   | -0.6 | -2.7 | 6.5 | 19.6  | C11 H11 O5 |

Figure S2.23 HRMS data for **8**;  $m/z$  (M-H)<sup>-</sup> calc. mass is 223.0606, 223.0600 was found.

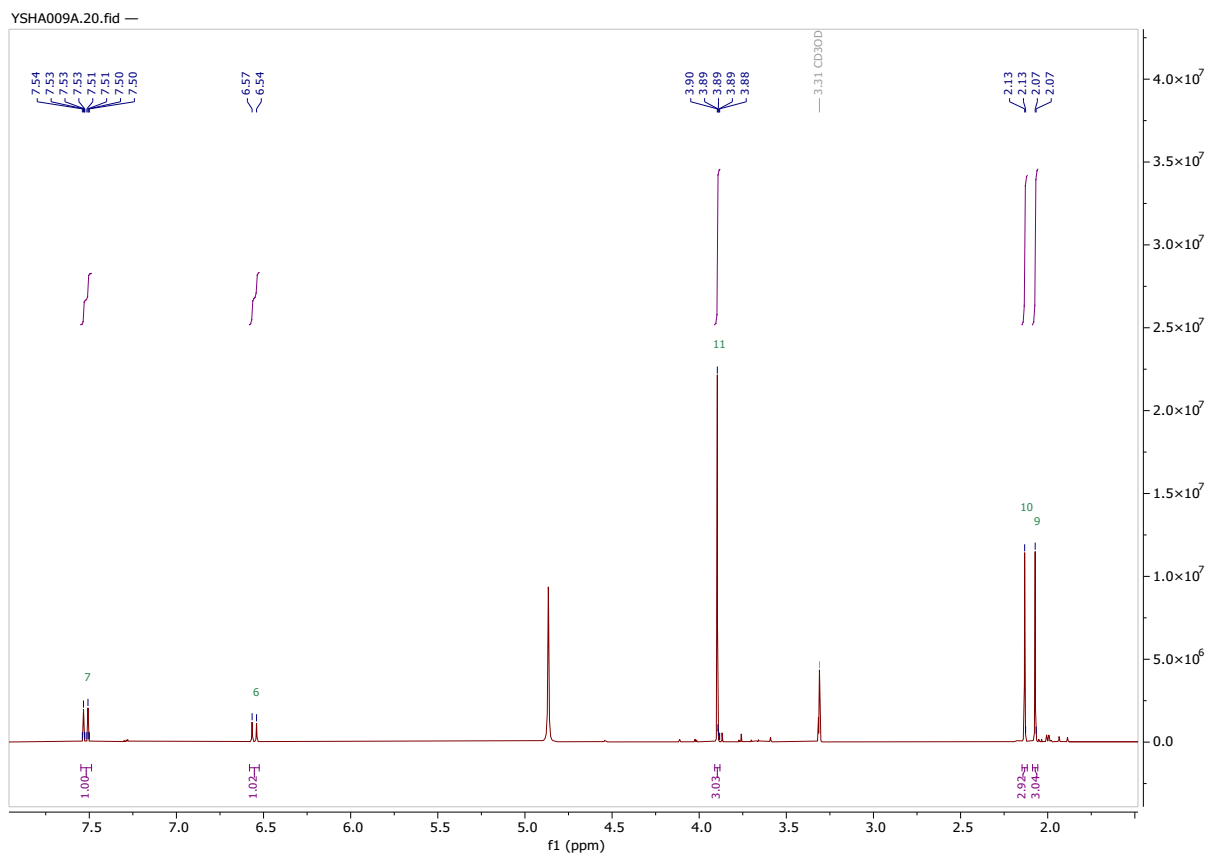

Figure S2.24 <sup>1</sup>H-NMR of **8** recorded at 600 MHz in CD<sub>3</sub>OD.

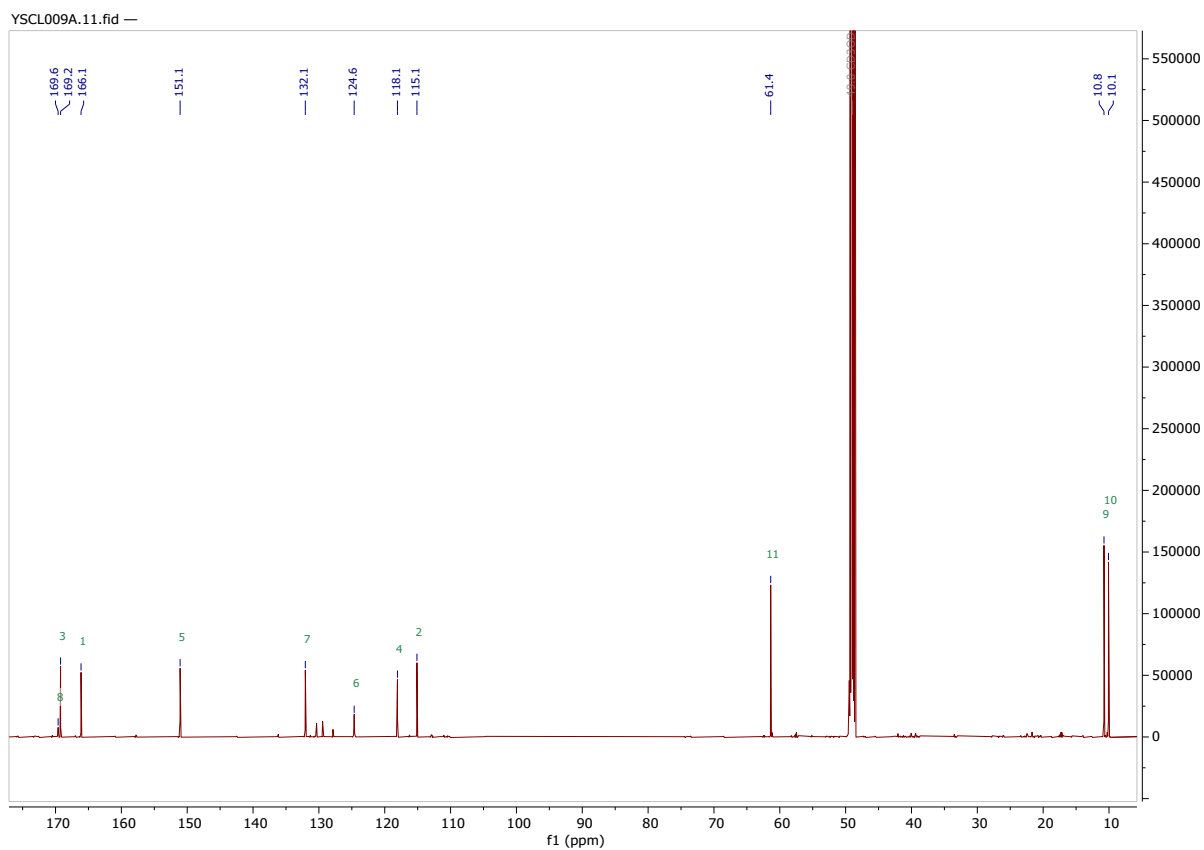

Figure S2.25 <sup>13</sup>C-NMR of **8** recorded at 150 MHz in CD<sub>3</sub>OD.

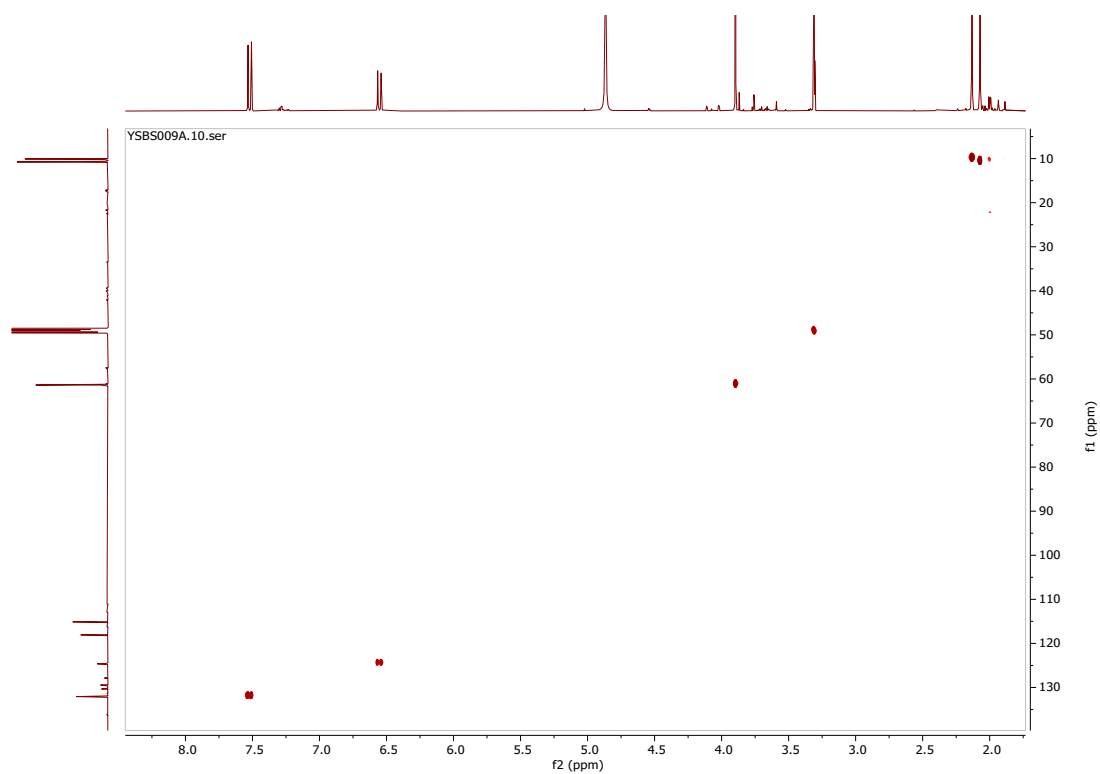

Figure S2.26 HSQC-spectrum of **8** recorded at 600, 150 MHz in CD<sub>3</sub>OD.

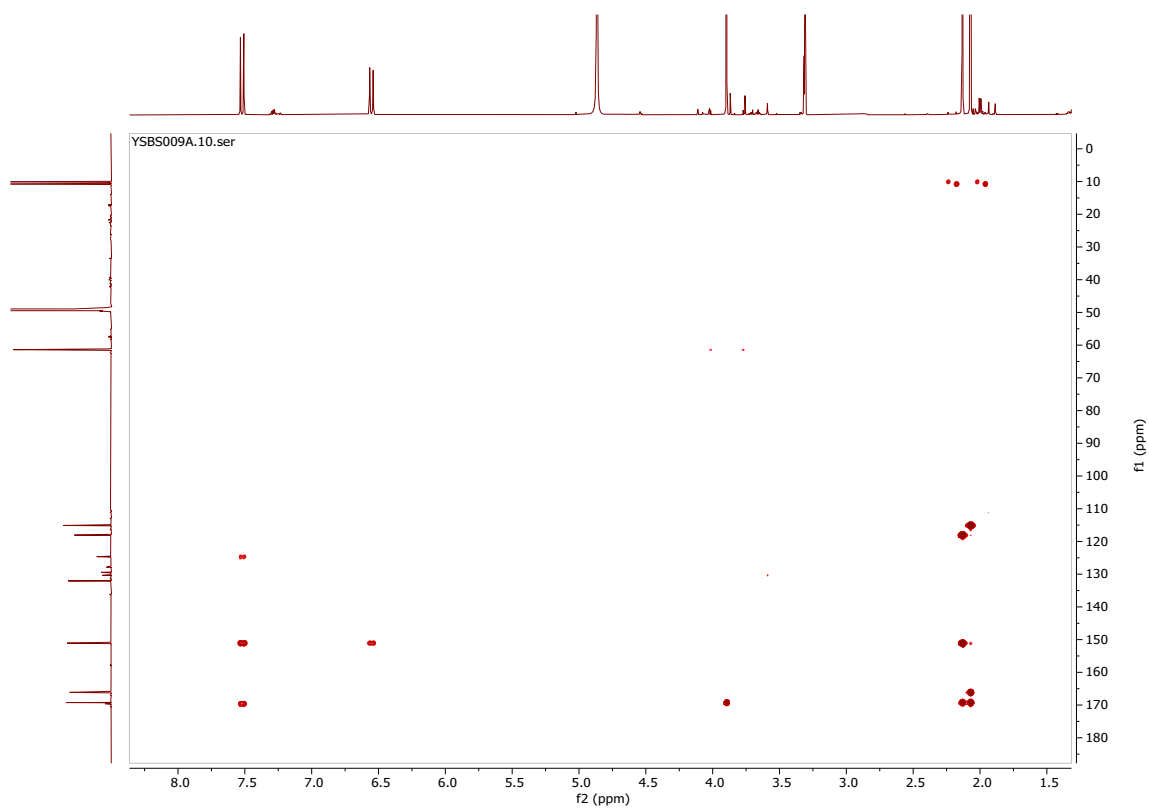

Figure S2.27 HMBC-spectrum of **8** recorded at 600, 150 MHz in CD<sub>3</sub>OD.

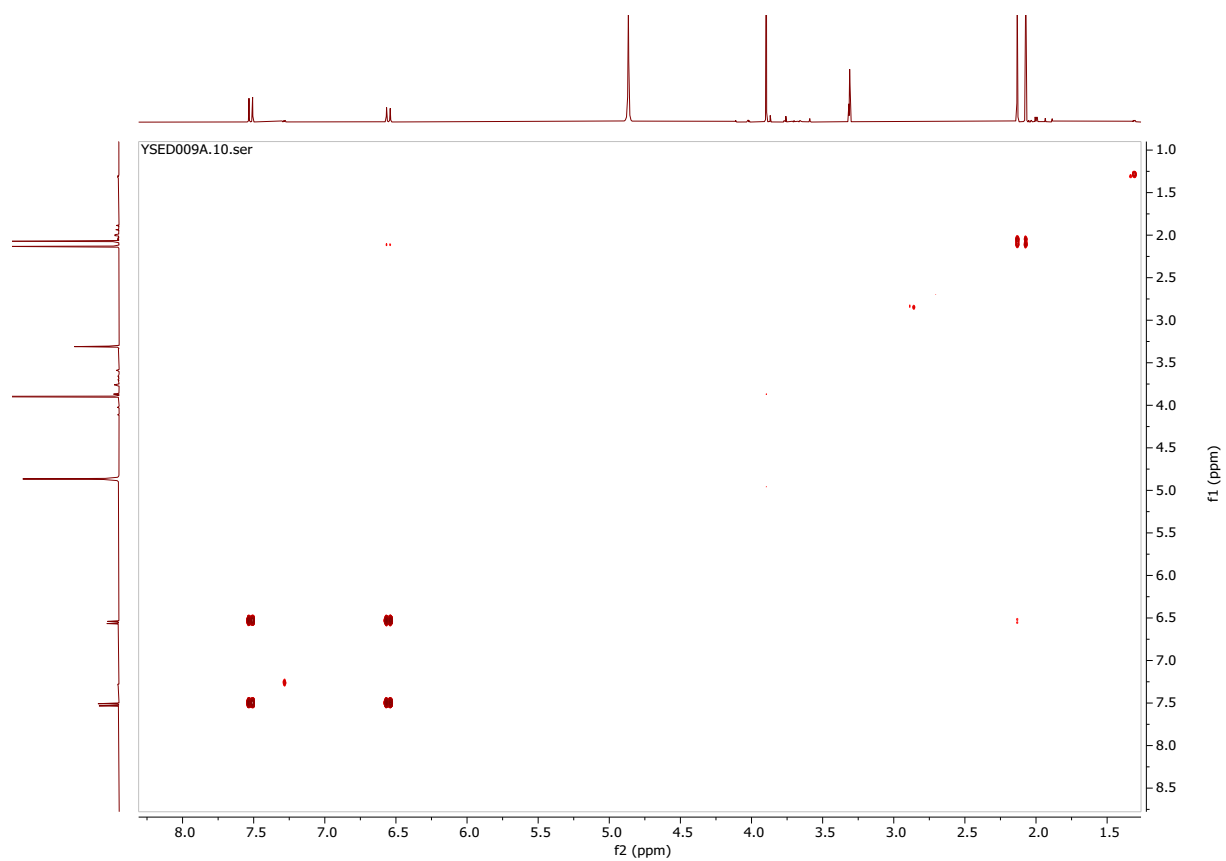

**Figure S2.28**  $^1\text{H}$ ,  $^1\text{H}$ -COSY-spectrum of **8** recorded at 600 MHz in  $\text{CD}_3\text{OD}$ .

## Compound 9

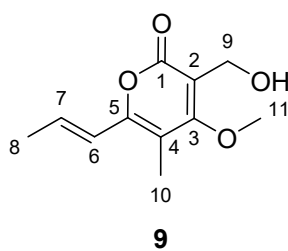

Chemical Formula: C<sub>11</sub>H<sub>14</sub>O<sub>4</sub>  
Exact Mass: 210.0892

| Compound 9 |                  |                                      |                                     |            |                                             |                                                    |
|------------|------------------|--------------------------------------|-------------------------------------|------------|---------------------------------------------|----------------------------------------------------|
| Pos.       | $\delta_C$ / ppm | $\delta_H$ / ppm (J/Hz)              | <sup>1</sup> H- <sup>1</sup> H COSY | HMBC (H-C) | $\delta_C$ / ppm literature <sup>[12]</sup> | $\delta_H$ / ppm (J/Hz) literature <sup>[12]</sup> |
| 1          | 166.9            |                                      |                                     |            | 165.1                                       |                                                    |
| 2          | 111.5            |                                      |                                     |            | 111.3                                       |                                                    |
| 3          | 172.2            |                                      |                                     |            | 169.4                                       |                                                    |
| 4          | 110.5            |                                      |                                     |            | 108.6                                       |                                                    |
| 5          | 155.6            |                                      |                                     |            | 154.2                                       |                                                    |
| 6          | 121.4            | 6.45, 1H, dddd (15.3, 1.7, 1.7, 1.7) | 7, 8                                | 5, 8       | 119.9                                       | 6.25, dq (15.3, 1.7)                               |
| 7          | 135.9            | 6.67, 1H, dddd (15.3, 6.9, 6.9, 6.9) | 6, 8                                | 5, 8       | 135.0                                       | 6.69, dq (15.4, 7.0)                               |
| 8          | 18.7             | 1.95, 3H, dd (7.48, 1.73)            | 6, 7                                | 6, 7       | 9.4                                         | 1.91, dd (7.0, 1.7)                                |
| 9          | 55.1             | 4.53, 2H, s                          |                                     | 1, 2, 3    | 61.9                                        | 4.56, s                                            |
| 10         | 9.6              | 2.0, 3H, s                           |                                     | 3, 4, 5    | 18.7                                        | 1.96, s                                            |
| 11         | 62.4             | 4.07, 3H, s                          |                                     | 3          | 55.8                                        | 3.96, s                                            |

**Table S2.5** Summarized NMR signals for <sup>13</sup>C, <sup>1</sup>H, <sup>1</sup>H-<sup>1</sup>H COSY, HMBC for **9** recorded in CD<sub>3</sub>OD, Compound from the literature <sup>[12]</sup> was measured in CDCl<sub>3</sub>.

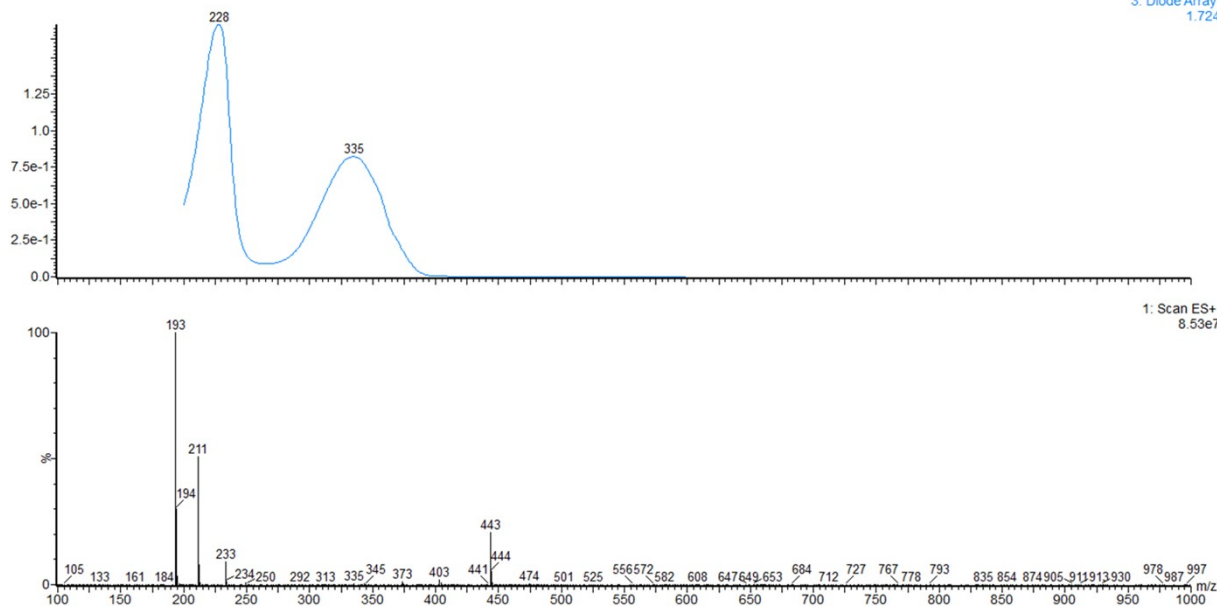

Figure S2.29 UV-absorption (top) and fragmentation pattern of 9 ES<sup>+</sup> TIC (bottom) by LR-LCMS.

### Elemental Composition Report

#### Single Mass Analysis

Tolerance = 20.0 PPM / DBE: min = -1.5, max = 50.0

Element prediction: Off

Number of isotope peaks used for i-FIT = 3

Monoisotopic Mass, Even Electron Ions

476 formula(e) evaluated with 10 results within limits (up to 50 closest results for each mass)

Elements Used:

C: 0-40 H: 0-50 N: 0-10 O: 0-10 Na: 0-1

Sun

QToF Premier HAB321

YS 008 360 (3.680) AM (Cen,4, 65.00, Ht,10000.0,556.28,0.70,LS 10)

1: TOF MS ES+  
1.14e+002

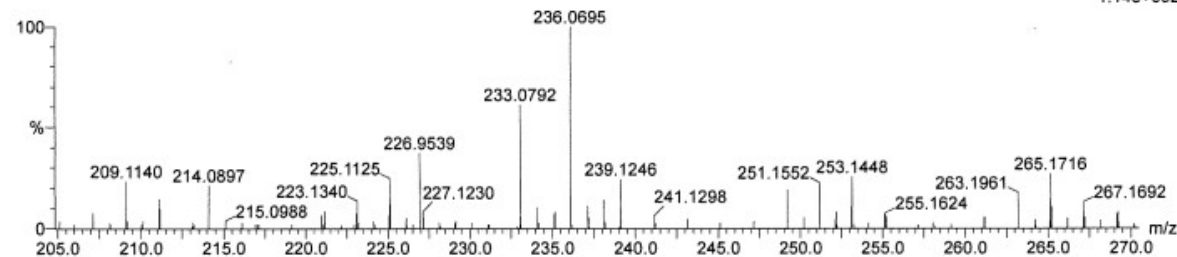

Minimum:

Maximum: 5.0 20.0 -1.5

| Mass     | Calc. Mass | mDa  | PPM   | DBE  | i-FIT | i-FIT (Norm) | Formula         |
|----------|------------|------|-------|------|-------|--------------|-----------------|
| 233.0792 | 233.0790   | 0.2  | 0.9   | 4.5  | 22.9  | 1.6          | C11 H14 O4 Na   |
|          | 233.0787   | 0.5  | 2.1   | 8.5  | 23.1  | 1.8          | C9 H9 N6 O2     |
|          | 233.0803   | -1.1 | -4.7  | 9.5  | 22.9  | 1.6          | C12 H10 N4 Na   |
|          | 233.0774   | 1.8  | 7.7   | 3.5  | 23.8  | 2.4          | C8 H13 N2 O6    |
|          | 233.0814   | -2.2 | -9.4  | 7.5  | 23.2  | 1.9          | C13 H13 O4      |
|          | 233.0763   | 2.9  | 12.4  | 5.5  | 24.4  | 3.1          | C7 H10 N6 O2 Na |
|          | 233.0827   | -3.5 | -15.0 | 12.5 | 23.7  | 2.4          | C14 H9 N4       |
|          | 233.0750   | 4.2  | 18.0  | 0.5  | 25.2  | 3.9          | C6 H14 N2 O6 Na |
|          | 233.0835   | -4.3 | -18.4 | 1.5  | 25.6  | 4.2          | C H10 N10 O3 Na |
|          | 233.0747   | 4.5  | 19.3  | 4.5  | 25.5  | 4.1          | C4 H9 N8 O4     |

Figure S2.30 HRMS data for 9;  $m/z$  (M+Na) calc. mass is 233.0790, 233.0792 was found.

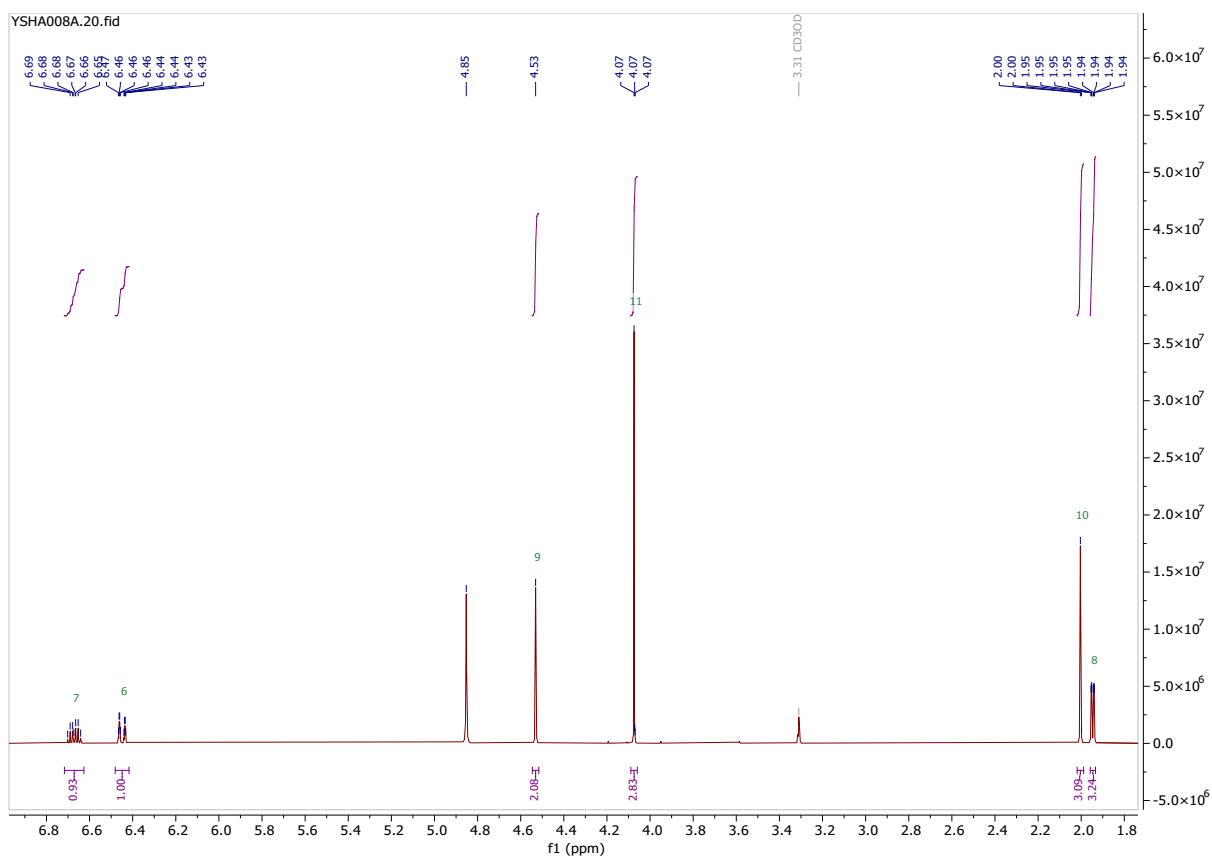

Figure S2.31  $^1\text{H-NMR}$  of **9** recorded at 600 MHz in  $\text{CD}_3\text{OD}$ .

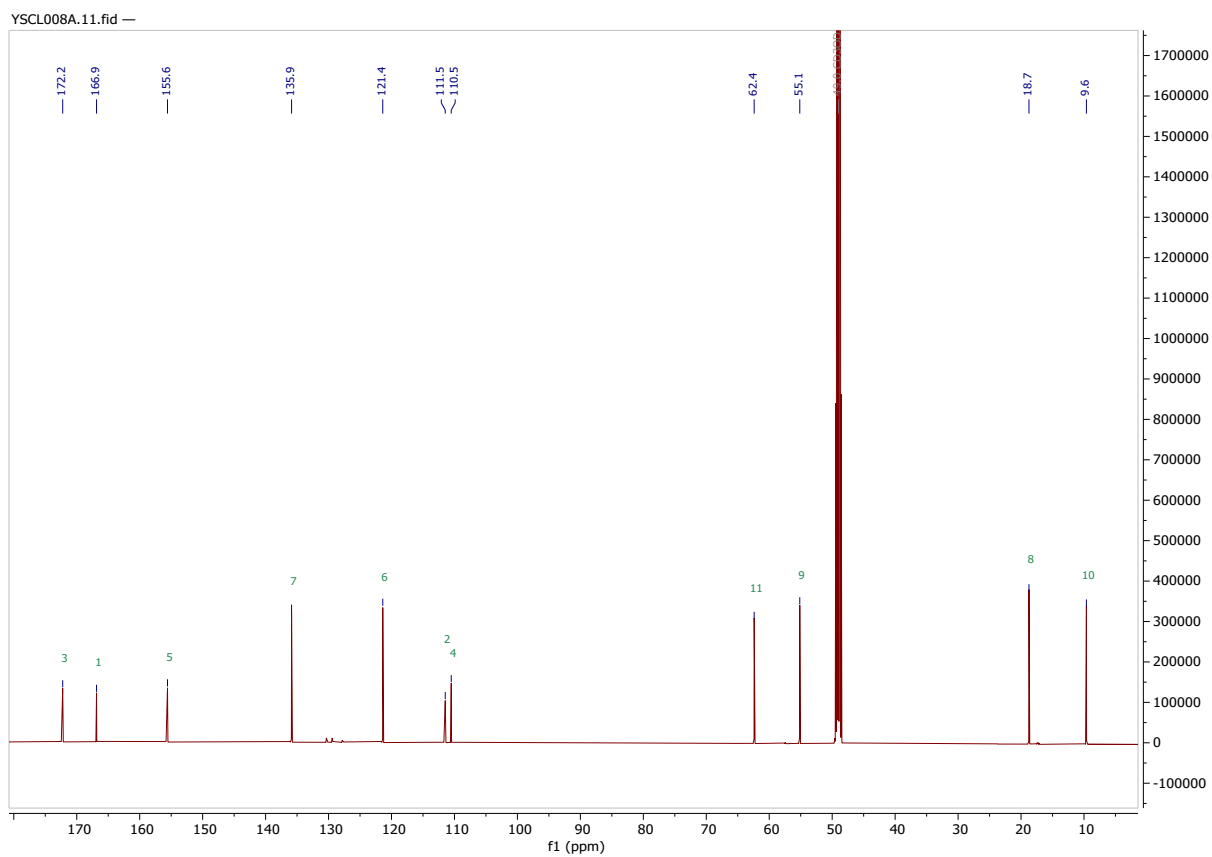

Figure S2.32  $^{13}\text{C-NMR}$  of **9** recorded at 150 MHz in  $\text{CD}_3\text{OD}$ .

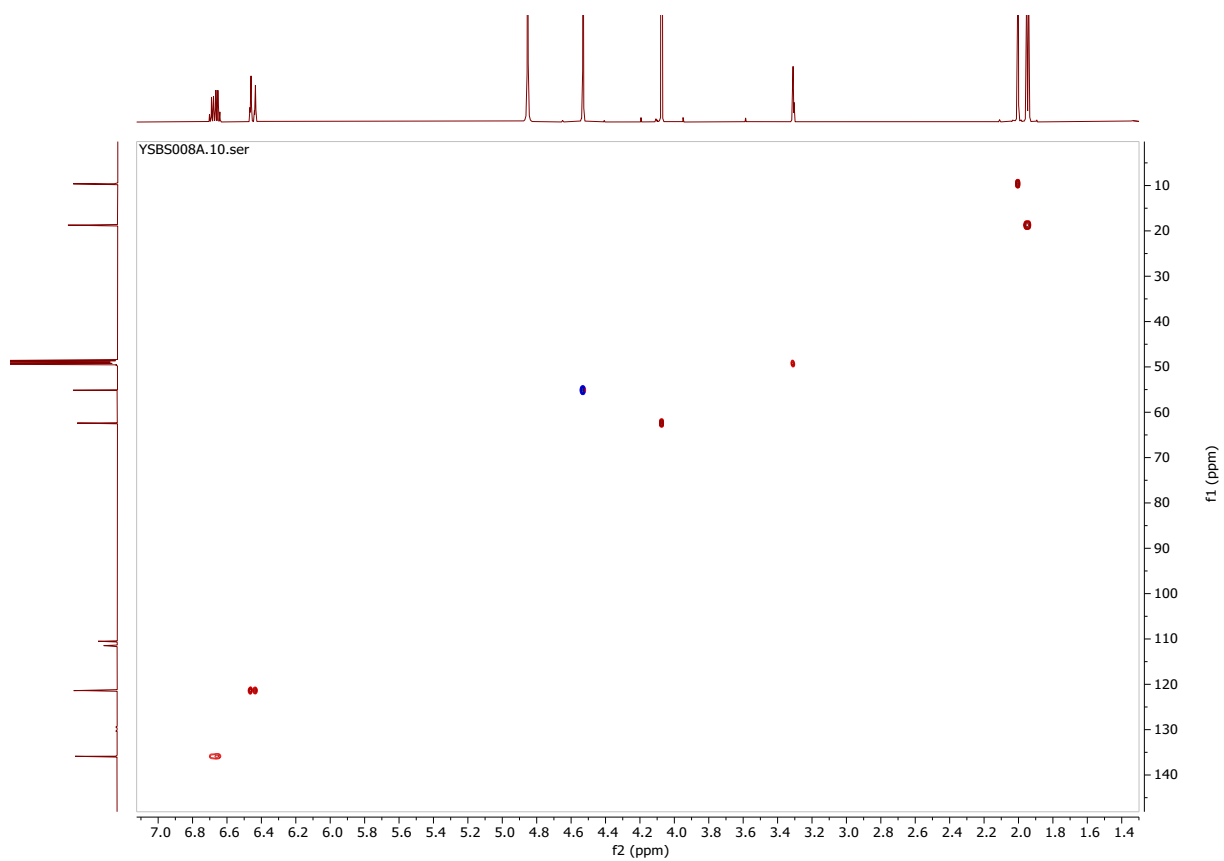

**Figure S2.33** HSQC-spectrum of **9** recorded at 600, 150 MHz in CD<sub>3</sub>OD.

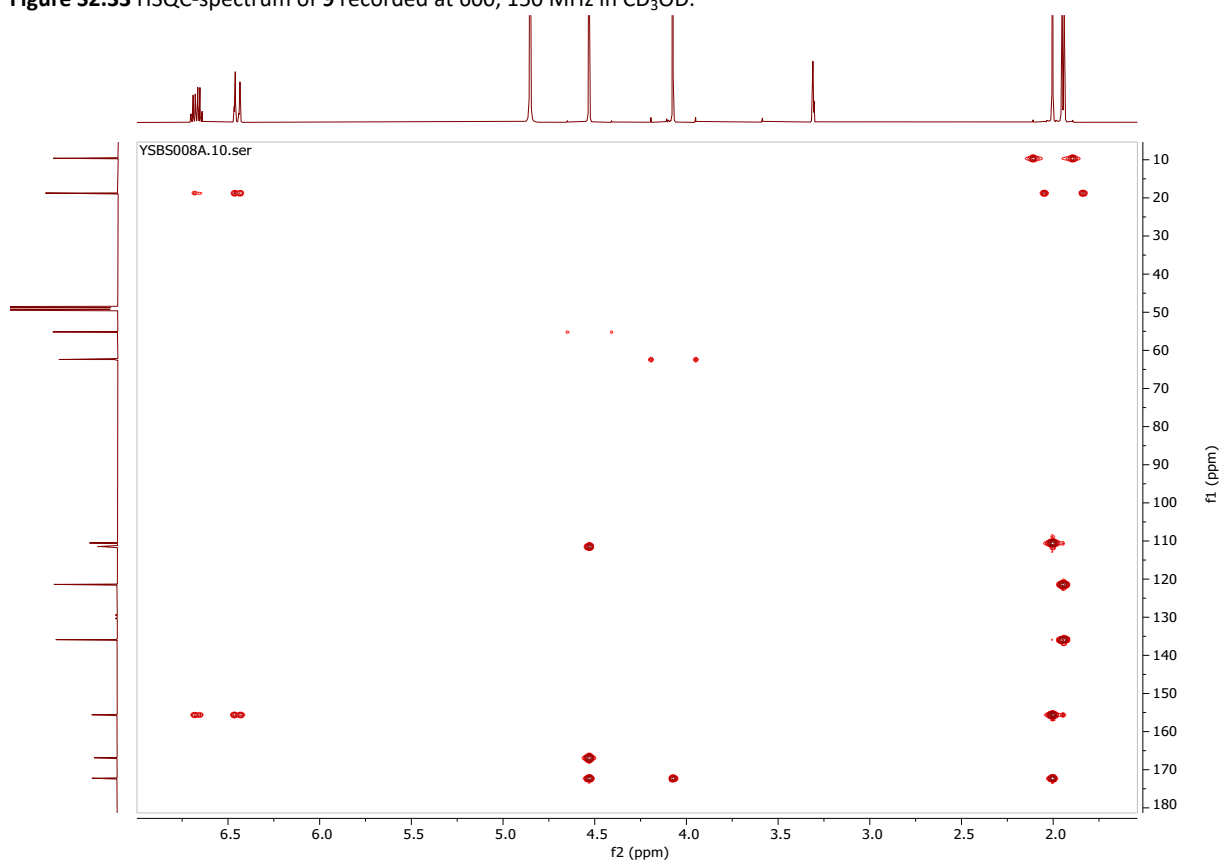

**Figure S2.34** HMBC-spectrum of **9** recorded at 600, 150 MHz in CD<sub>3</sub>OD.



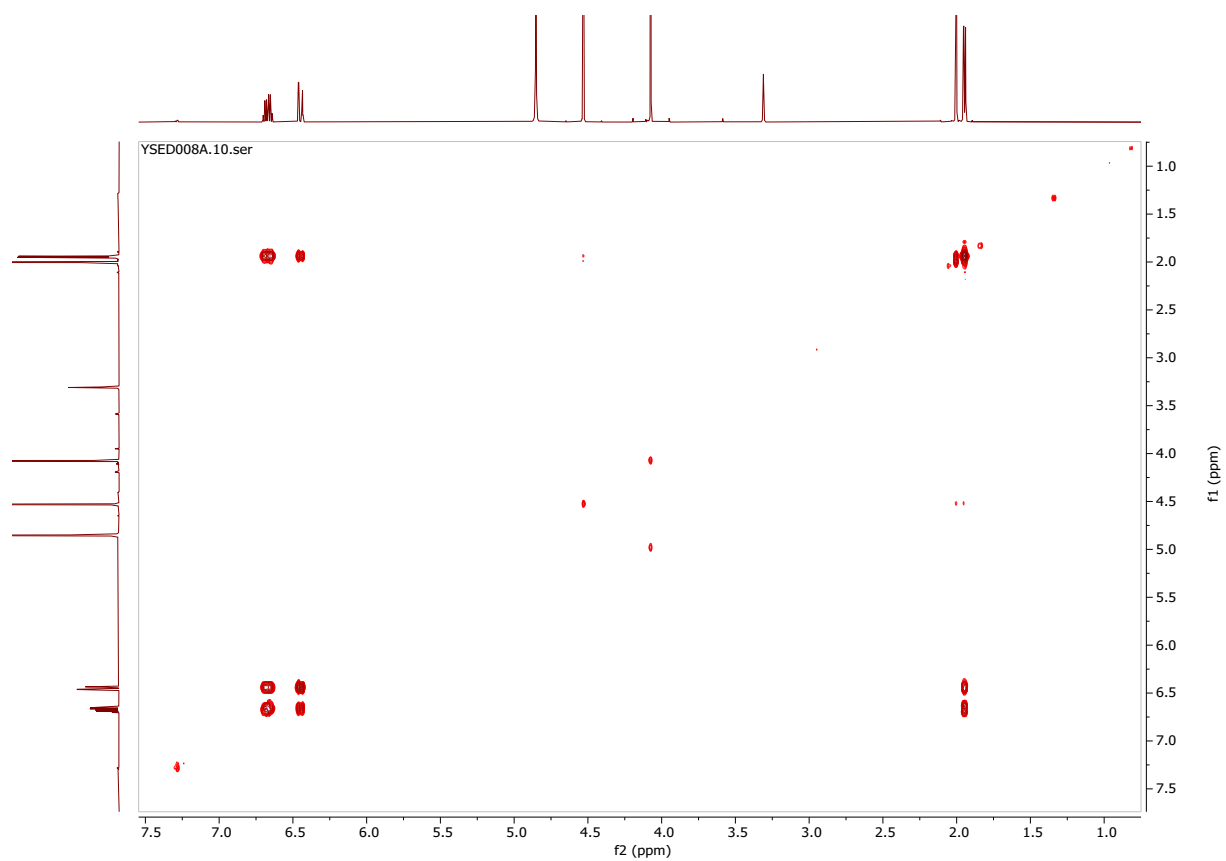

**Figure S2.35**  $^1\text{H}$ ,  $^1\text{H}$ -COSY-spectrum of **9** recorded at 600 MHz in  $\text{CD}_3\text{OD}$ .

## Compound 10

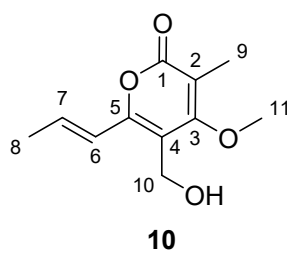

Chemical Formula: C<sub>11</sub>H<sub>14</sub>O<sub>4</sub>  
Exact Mass: 210.0892

| Compound 10 |                  |                                      |                                     |            |
|-------------|------------------|--------------------------------------|-------------------------------------|------------|
| Pos.        | $\delta_C$ / ppm | $\delta_H$ / ppm (J/Hz)              | <sup>1</sup> H- <sup>1</sup> H COSY | HMBC (H-C) |
| 1           | 167.1            |                                      |                                     |            |
| 2           | 111.0            |                                      |                                     |            |
| 3           | 170.3            |                                      |                                     |            |
| 4           | 114.2            |                                      |                                     |            |
| 5           | 156.9            |                                      |                                     |            |
| 6           | 121.2            | 6.56, 1H, dddd (15.3, 1.6, 1.6, 1.6) | 7, 8                                | 5, 7, 8    |
| 7           | 136.1            | 6.71, 1H, dddd (15.3, 6.8, 6.8, 6.8) |                                     |            |
| 8           | 18.8             | 1.95, 3H, dd (6.8, 1.6)              | 6, 7                                | 5, 6, 7    |
| 9           | 10.4             | 2.03, 3H, s                          |                                     | 1, 2, 3    |
| 10          | 54.5             | 4.46, 2H, s                          |                                     | 3, 4, 5    |
| 11          | 62.1             | 3.94, 3H, s                          |                                     | 3          |

**Table S2.6** Summarized NMR signals for <sup>13</sup>C, <sup>1</sup>H, <sup>1</sup>H-<sup>1</sup>H COSY, HMBC for **10** recorded in CD<sub>3</sub>OD.

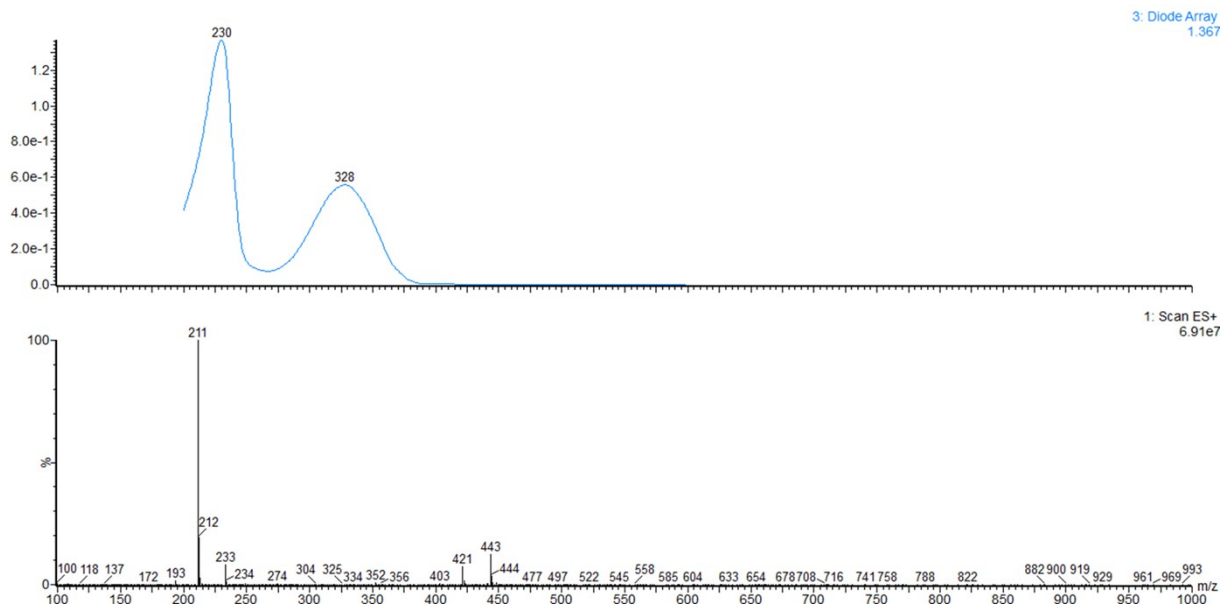

Figure S2.36 UV-absorption (top) and fragmentation pattern of **10** in ES<sup>+</sup> TIC (bottom) by LR-LCMS.

## Elemental Composition Report

Page 1

### Single Mass Analysis

Tolerance = 20.0 PPM / DBE: min = -1.5, max = 50.0

Element prediction: Off

Number of isotope peaks used for i-FIT = 3

Monoisotopic Mass, Even Electron Ions

57 formula(e) evaluated with 2 results within limits (up to 30 closest results for each mass)

Elements Used:

C: 0-85 H: 0-116 O: 0-12 Na: 0-1

Sun

QToF Premier HAB321

YS 036 509 (5.207) AM (Cen,4, 70.00, Ht,10000.0,556.28,0,70,LS 10)

1: TOF MS ES+  
9.50e+001

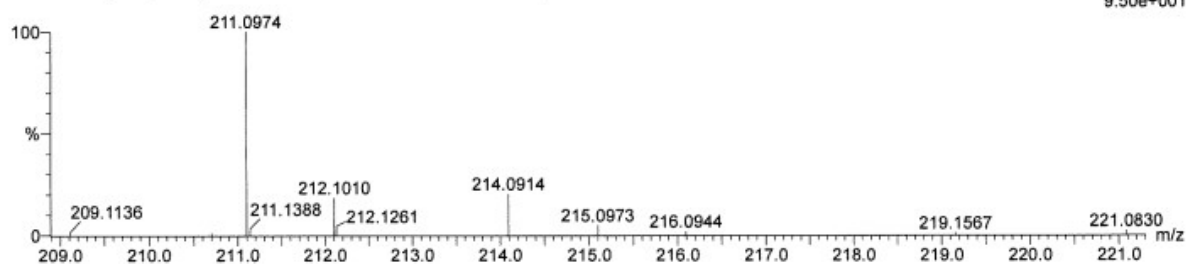

Minimum: -1.5  
Maximum: 5.0 20.0 50.0

| Mass     | Calc. Mass | mDa | PPM  | DBE | i-FIT | i-FIT (Norm) | Formula      |
|----------|------------|-----|------|-----|-------|--------------|--------------|
| 211.0974 | 211.0970   | 0.4 | 1.9  | 4.5 | 13.3  | 0.2          | C11 H15 O4   |
|          | 211.0946   | 2.8 | 13.3 | 1.5 | 14.7  | 1.7          | C9 H16 O4 Na |

Figure S2.37 HRMS data for **10**;  $m/z$  (M+H)<sup>+</sup> calc. mass is 211.0970, 211.0974 was found.

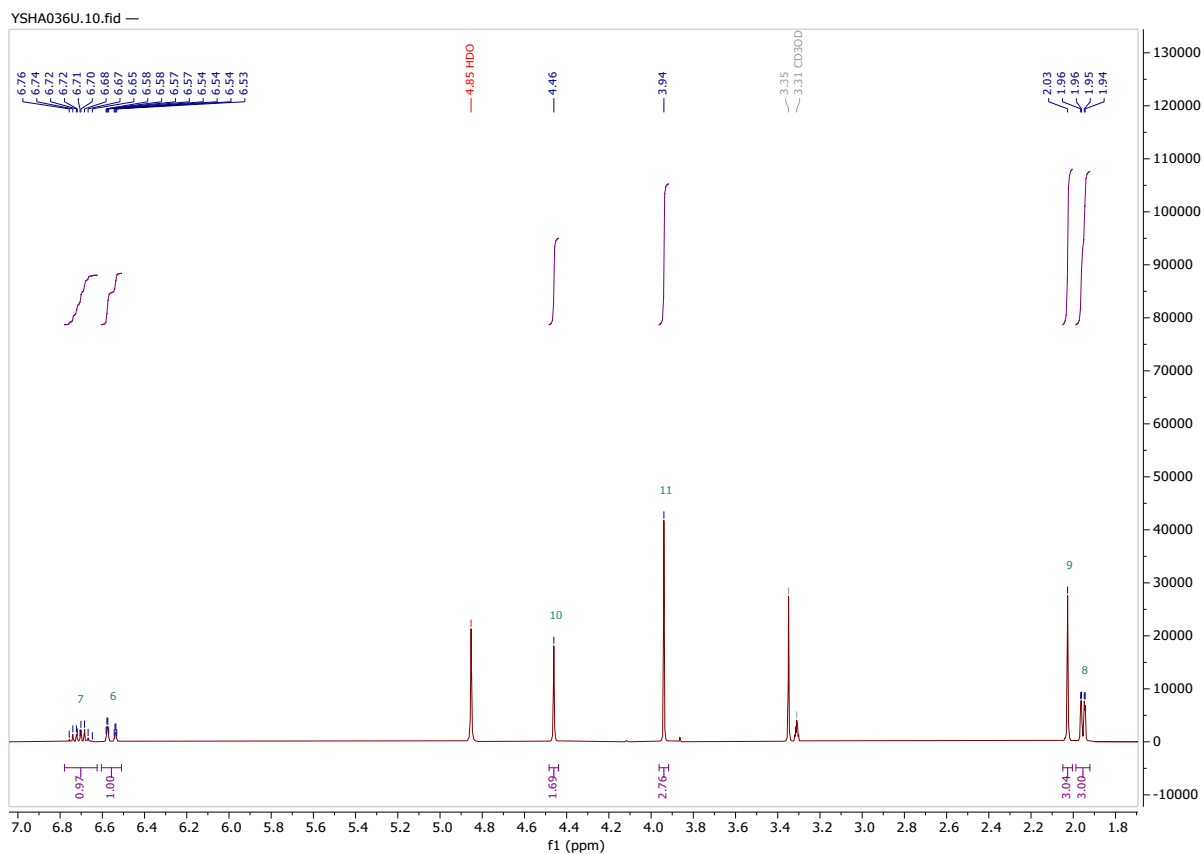

**Figure S2.38**  $^1\text{H-NMR}$  of **10** recorded at 400 MHz in  $\text{CD}_3\text{OD}$ .

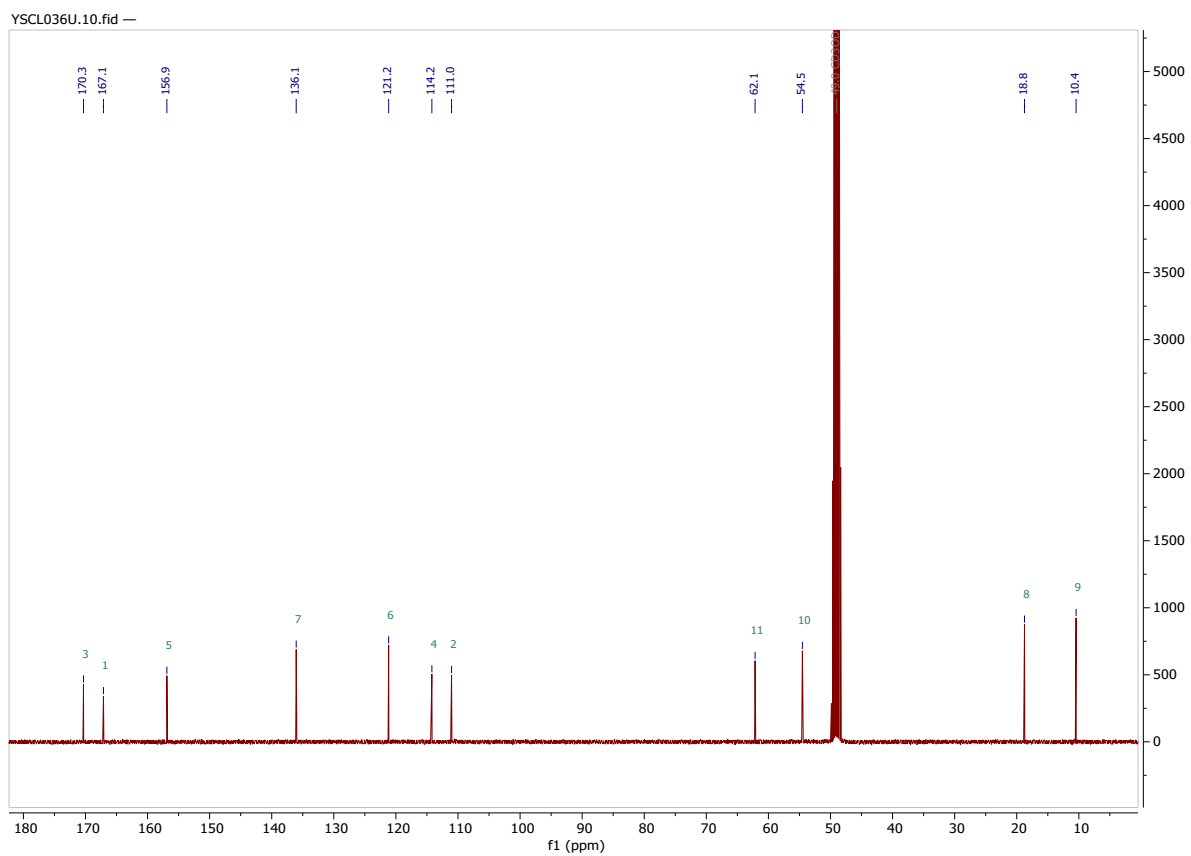

**Figure S2.39**  $^{13}\text{C-NMR}$  of **10** recorded at 100 MHz in  $\text{CD}_3\text{OD}$ .

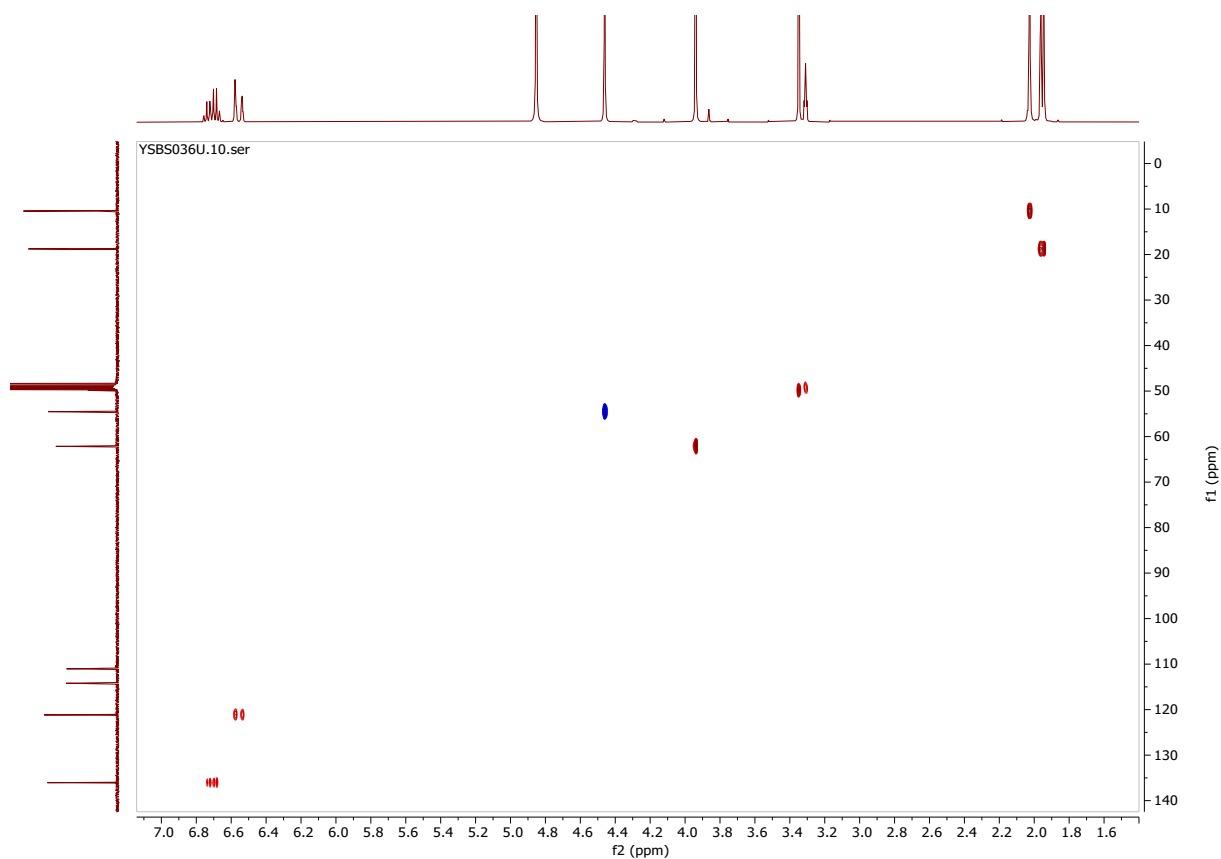

**Figure S2.40** HSQC-spectrum of **10** recorded at 400, 100 MHz in CD<sub>3</sub>OD.

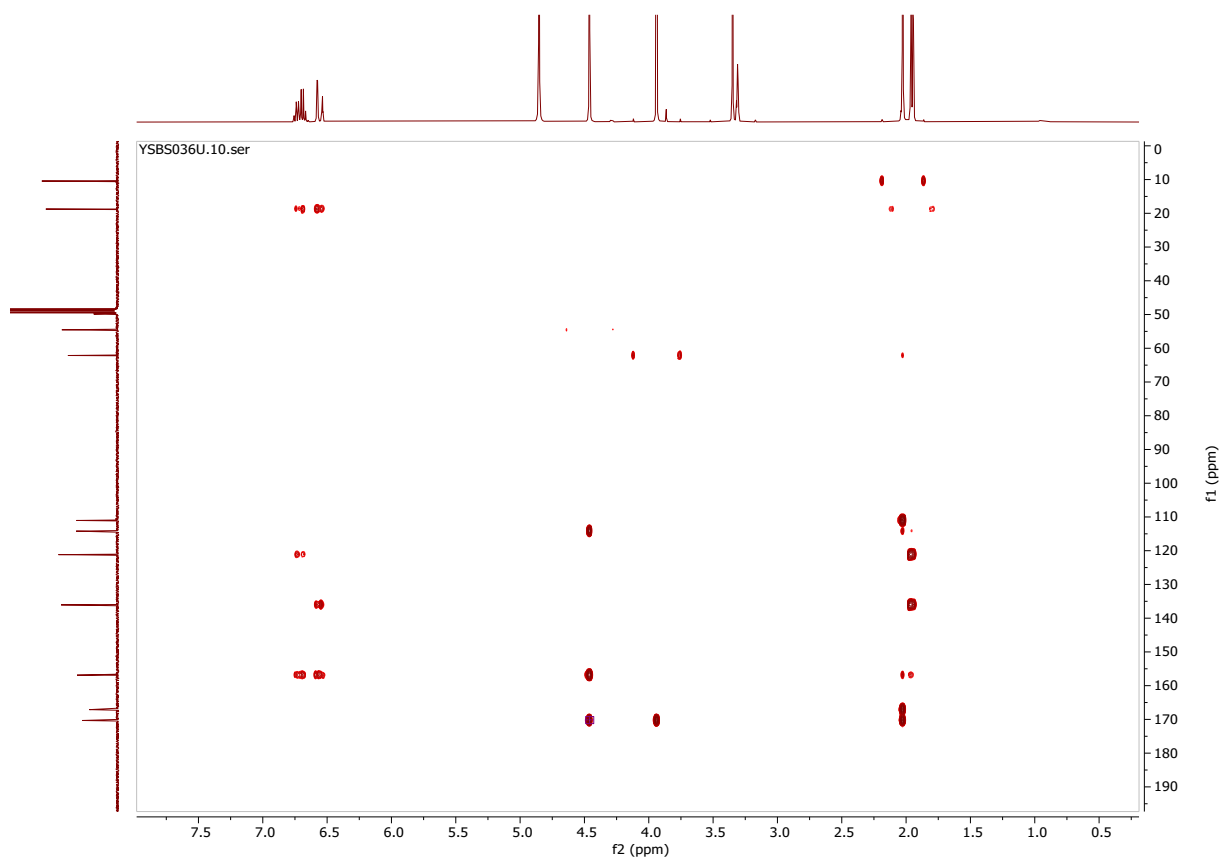

**Figure S2.41** HMBC-spectrum of **10** recorded at 400, 100 MHz in CD<sub>3</sub>OD.

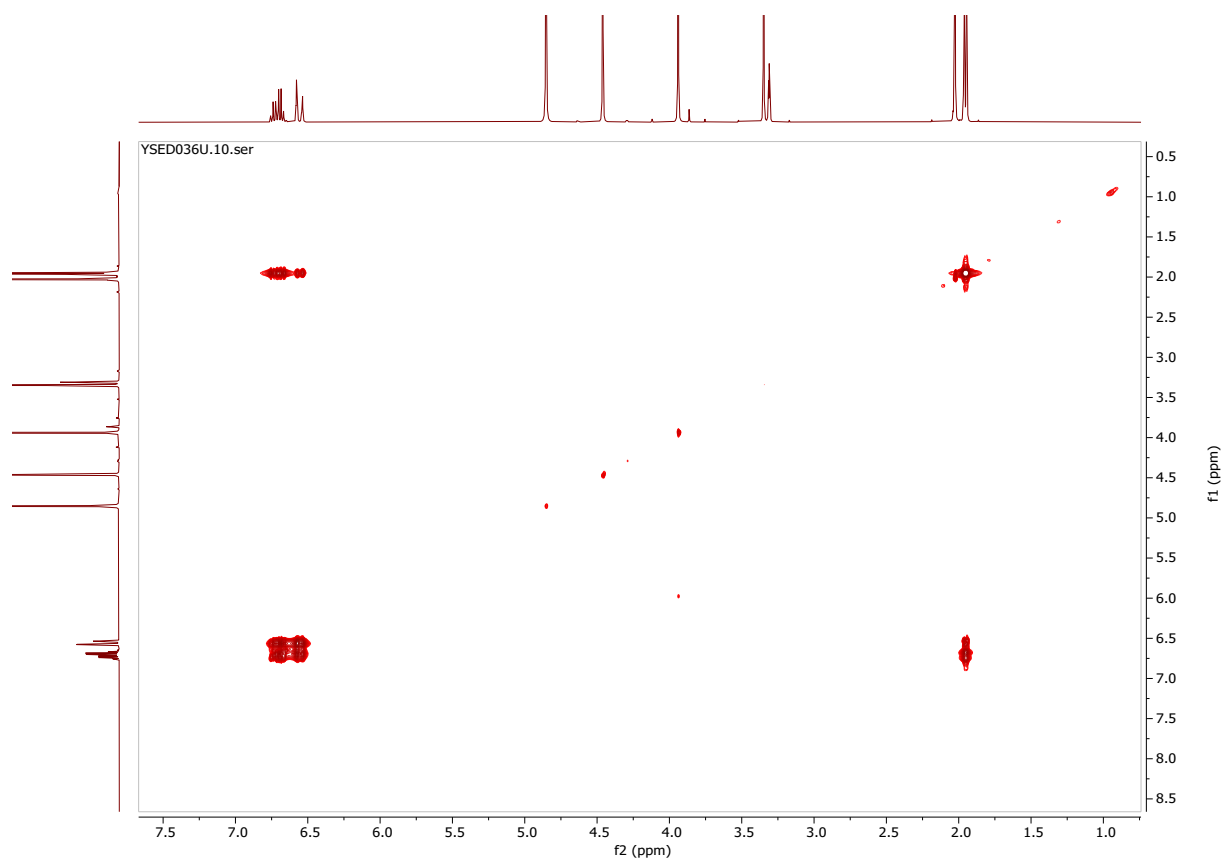

**Figure S2.42**  $^1\text{H}$ ,  $^1\text{H}$ -COSY-spectrum of **10** recorded at 400 MHz in  $\text{CD}_3\text{OD}$ .

## Compound 11

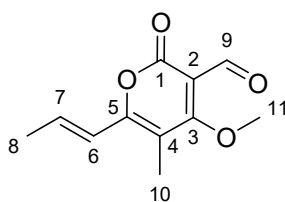

**11**

Chemical Formula: C<sub>11</sub>H<sub>12</sub>O<sub>4</sub>

Exact Mass: 208.0736

| Compound 11 |                  |                                      |                                     |            |
|-------------|------------------|--------------------------------------|-------------------------------------|------------|
| Pos.        | $\delta_C$ / ppm | $\delta_H$ / ppm (J/Hz)              | <sup>1</sup> H- <sup>1</sup> H COSY | HMBC (H-C) |
| <b>1</b>    | 162.3            |                                      |                                     |            |
| <b>2</b>    | 104.9            |                                      |                                     |            |
| <b>3</b>    | 175.1            |                                      |                                     |            |
| <b>4</b>    | 109.3            |                                      |                                     |            |
| <b>5</b>    | 157.8            |                                      |                                     |            |
| <b>6</b>    | 120.6            | 6.61, 1H, dddd (15.3, 1.5, 1.5, 1.5) | 7, 8                                | 5, 7, 8    |
| <b>7</b>    | 138.7            | 6.72, 1H, m                          | 6, 8                                | 5, 6, 8    |
| <b>8</b>    | 18.7             | 1.95, 3H, m                          | 6, 7                                | 6, 7       |
| <b>9</b>    | 187.5            | 9.94, 1H, s                          |                                     | 2, 3       |
| <b>10</b>   | 8.9              | 1.95, 3H, m                          |                                     | 3, 4, 5    |
| <b>11</b>   | 64.6             | 4.02, 3H, s                          |                                     | 3          |

**Table S2.7** Summarized NMR signals for <sup>13</sup>C, <sup>1</sup>H, <sup>1</sup>H-<sup>1</sup>H COSY, HMBC for **11** recorded in DMSO-d<sub>6</sub>.

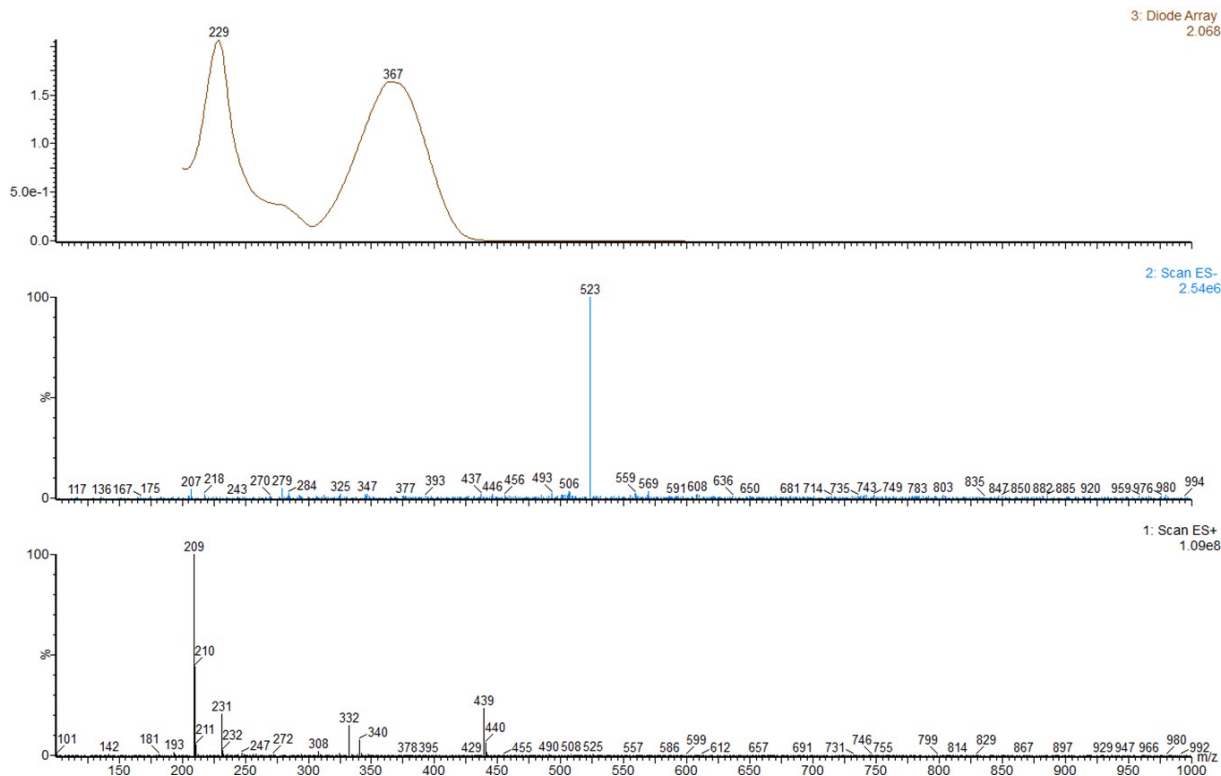

Figure S2.43 UV-absorption (top) and fragmentation pattern of **11** in ES<sup>-</sup> (middle) and ES<sup>+</sup> TIC (bottom) by LR-LCMS.

## Elemental Composition Report

Page 1

### Single Mass Analysis

Tolerance = 20.0 PPM / DBE: min = -1.5, max = 50.0

Element prediction: Off

Number of isotope peaks used for i-FIT = 3

Monoisotopic Mass, Odd and Even Electron Ions

259 formula(e) evaluated with 10 results within limits (up to 30 closest results for each mass)

Elements Used:

C: 0-80 H: 0-100 N: 0-5 O: 0-7 Na: 0-1

Sun

QToF Premier HAB321

YS 014 617 (6.300) AM (Cen,4, 80.00, Ht,10000.0,556.28,0.70,LS 10); Sm (SG, 1x5.00)

1: TOF MS ES+  
1.44e+002

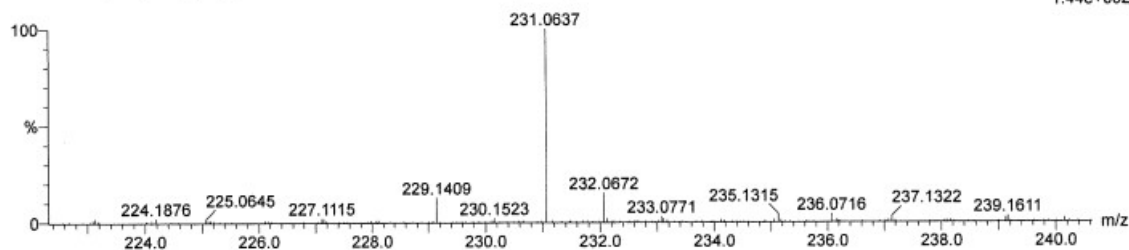

Minimum: -1.5  
Maximum: 50.0

| Mass     | Calc. Mass | mDa  | PPM   | DBE  | i-FIT | i-FIT (Norm) | Formula         |
|----------|------------|------|-------|------|-------|--------------|-----------------|
| 231.0637 | 231.0633   | 0.4  | 1.7   | 5.5  | 29.3  | 1.7          | C11 H12 O4 Na   |
|          | 231.0644   | -0.7 | -3.0  | 9.0  | 29.3  | 1.7          | C11 H9 N3 O3    |
|          | 231.0647   | -1.0 | -4.3  | 10.5 | 29.5  | 1.8          | C12 H8 N4 Na    |
|          | 231.0620   | 1.7  | 7.4   | 6.0  | 30.3  | 2.6          | C9 H10 N3 O3 Na |
|          | 231.0617   | 2.0  | 8.7   | 4.5  | 30.6  | 2.9          | C8 H11 N2 O6    |
|          | 231.0657   | -2.0 | -8.7  | 8.5  | 29.5  | 1.9          | C13 H11 O4      |
|          | 231.0660   | -2.3 | -10.0 | 10.0 | 29.8  | 2.1          | C14 H10 N O Na  |
|          | 231.0604   | 3.3  | 14.3  | 5.0  | 32.1  | 4.5          | C6 H9 N5 O5     |
|          | 231.0671   | -3.4 | -14.7 | 13.5 | 30.7  | 3.0          | C14 H7 N4       |
|          | 231.0593   | 4.4  | 19.0  | 1.5  | 33.0  | 5.4          | C6 H12 N2 O6 Na |

Figure S2.44 HRMS data for **11**;  $m/z$  (M+Na) calc. mass is 231.0633, 231.0637 was found.



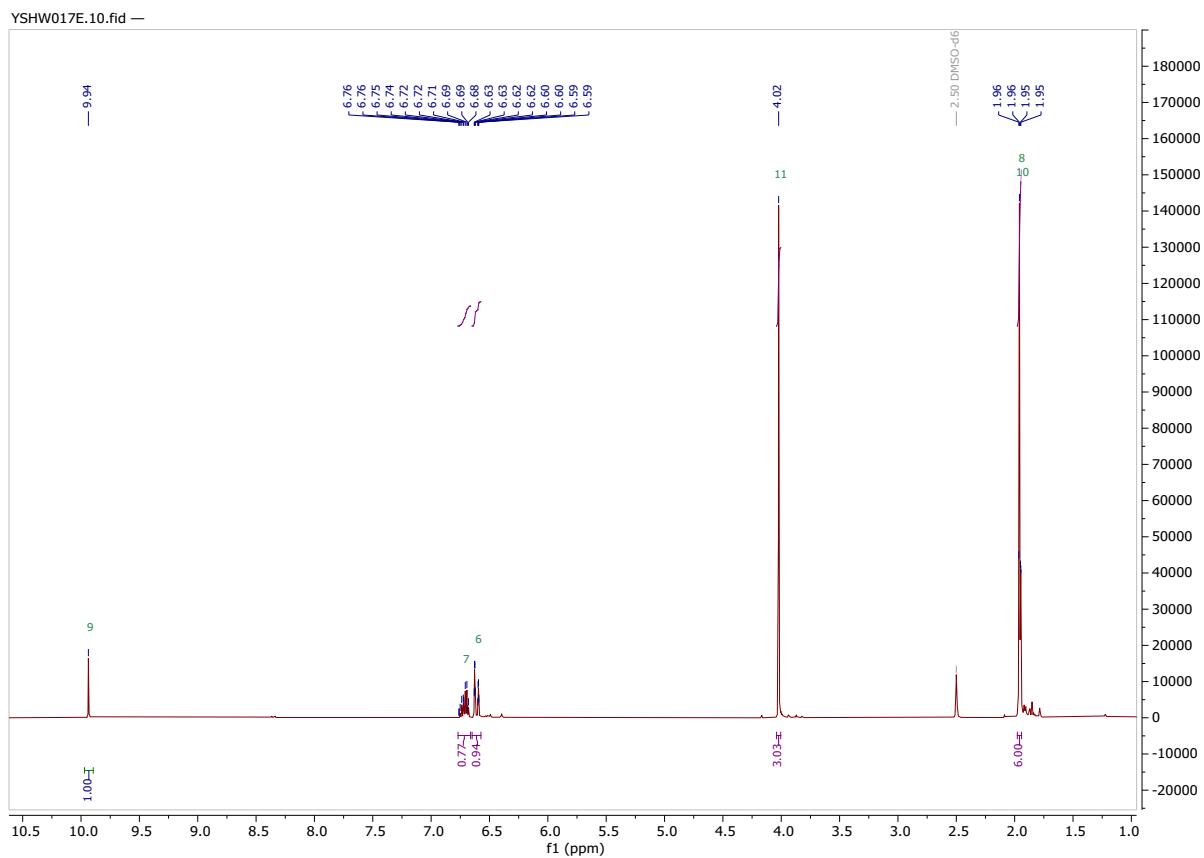

Figure S2.45  $^1\text{H}$ -NMR of **11** recorded at 500 MHz in  $\text{DMSO-d}_6$ .

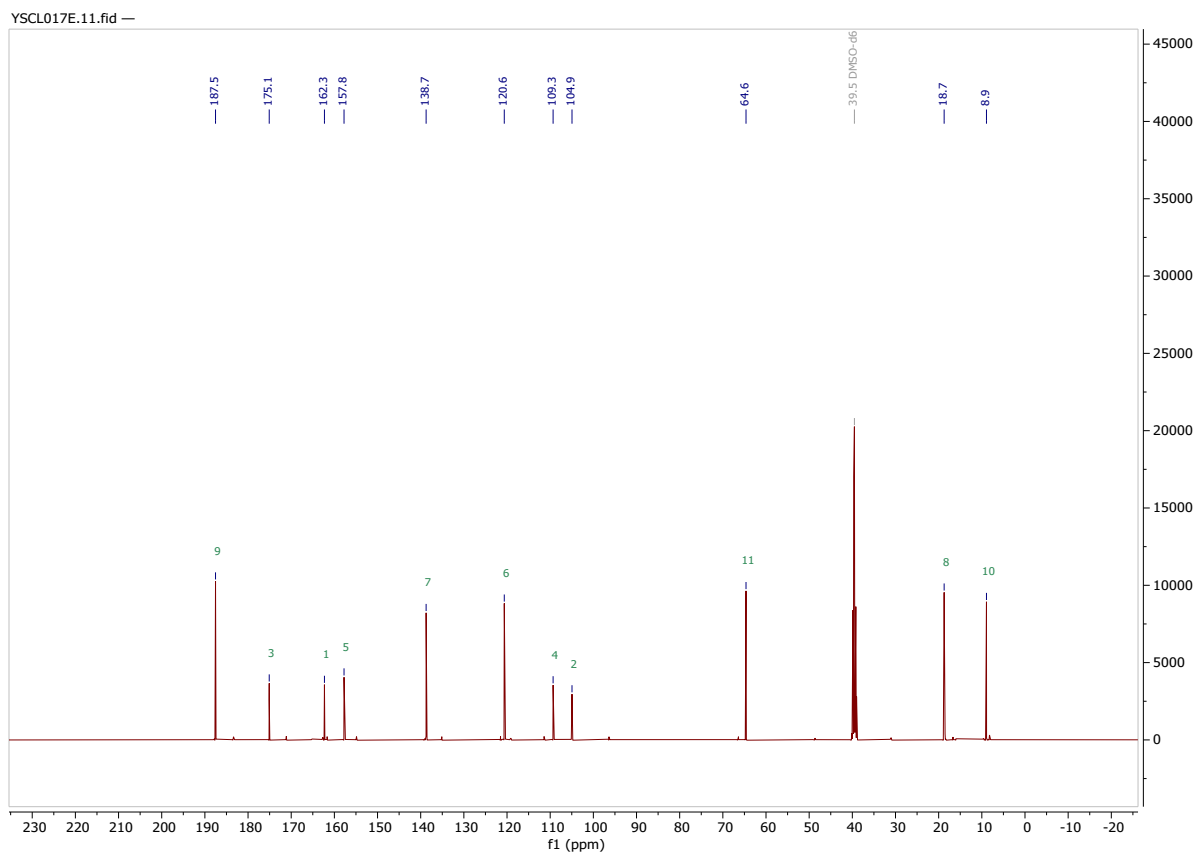

Figure S2.46  $^{13}\text{C}$ -NMR of **11** recorded at 125 MHz in  $\text{DMSO-d}_6$ .

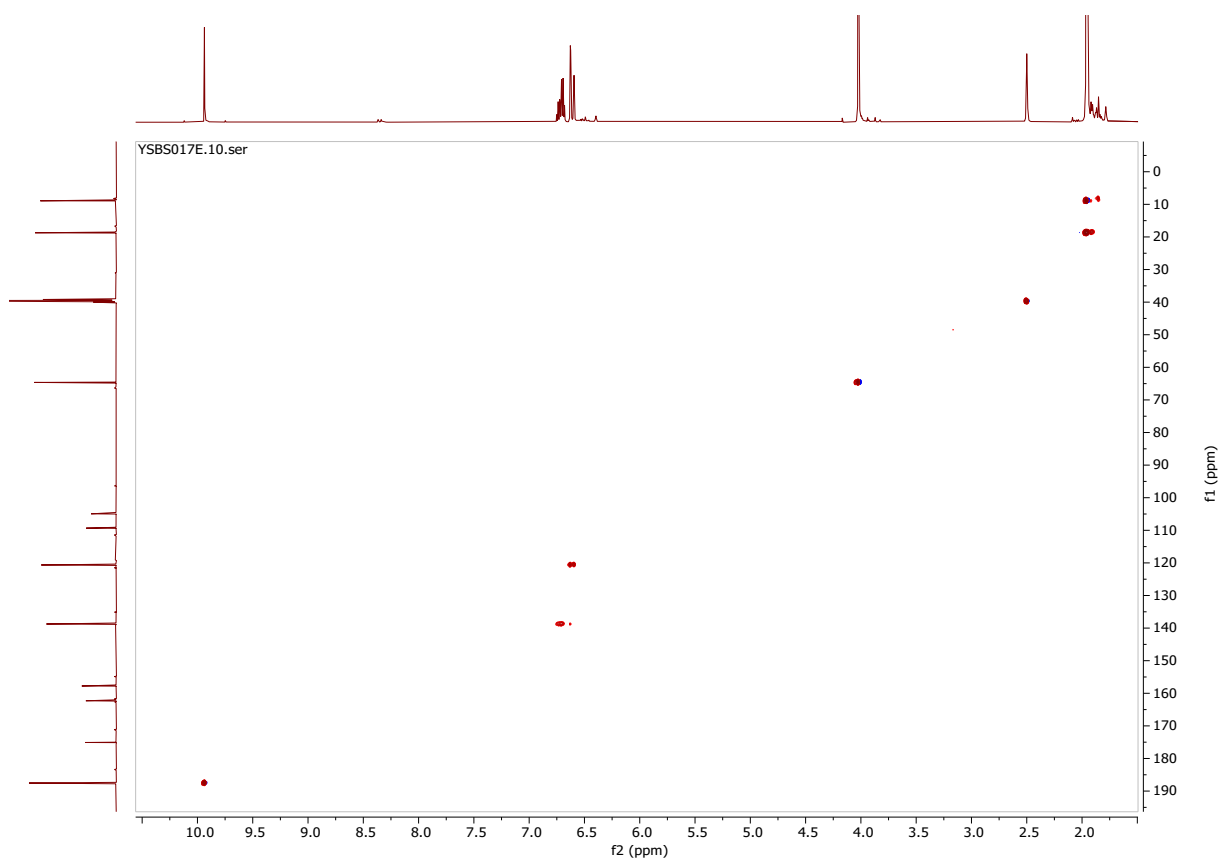

**Figure S2.47** HSQC-spectrum of **11** recorded at 500, 125 MHz in DMSO-d<sub>6</sub>.

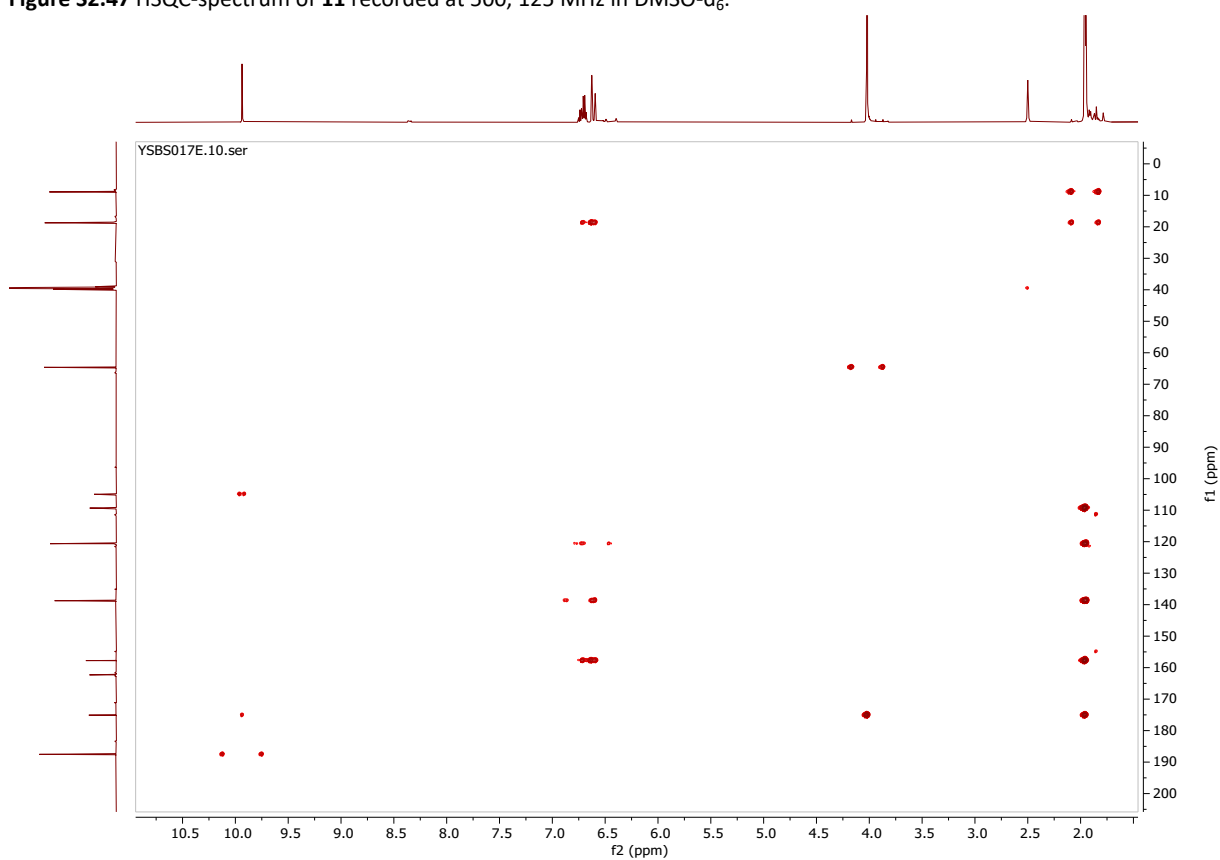

**Figure S2.48** HMBC-spectrum of **11** recorded at 500, 125 MHz in DMSO-d<sub>6</sub>.

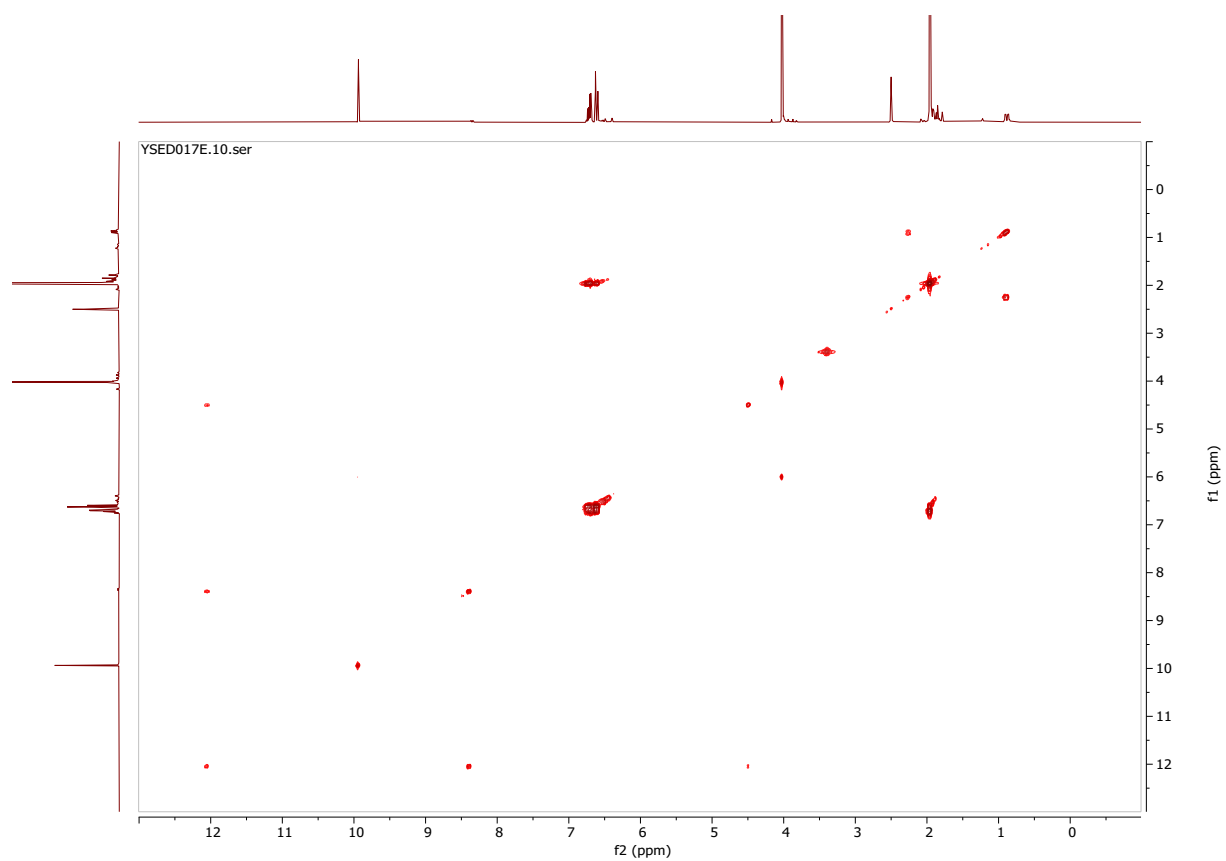

**Figure S2.49**  $^1\text{H}$ ,  $^1\text{H}$ -COSY-spectrum of **11** recorded at 500 MHz in  $\text{DMSO-d}_6$ .

## Compound 11

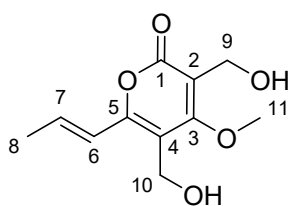

**11**

Chemical Formula: C<sub>11</sub>H<sub>14</sub>O<sub>5</sub>  
Exact Mass: 226.0841

| Compound 11 |                  |                         |                                     |            |                                             |                                                    |
|-------------|------------------|-------------------------|-------------------------------------|------------|---------------------------------------------|----------------------------------------------------|
| Pos.        | $\delta_c$ / ppm | $\delta_H$ / ppm (J/Hz) | <sup>1</sup> H- <sup>1</sup> H COSY | HMBC (H-C) | $\delta_c$ / ppm literature <sup>[13]</sup> | $\delta_H$ / ppm (J/Hz) literature <sup>[13]</sup> |
| 1           | 163.2            |                         |                                     |            | 164.9                                       |                                                    |
| 2           | 111.0            |                         |                                     |            | 110.8                                       |                                                    |
| 3           | 169.1            |                         |                                     |            | 168.8                                       |                                                    |
| 4           | 113.0            |                         |                                     |            | 111.8                                       |                                                    |
| 5           | 155.7            |                         |                                     |            | 156.8                                       |                                                    |
| 6           | 120.6            | 6.57, 1H, m             | 7, 8                                | 5, 8       | 119.3                                       | 6.42 (dq, 15.3, 1.8)                               |
| 7           | 134.6            | 6.57, 1H, m             | 6, 8                                | 5, 8       | 137.5                                       | 6.84 (dq, 15.3, 7.0)                               |
| 8           | 18.4             | 1.92, 3H, m             | 6, 7                                | 5, 6, 7    | 18.9                                        | 1.96(3H, dd, 7.0, 1.8)                             |
| 9           | 53.2             | 4.33, 2H, d (5.1)       |                                     | 1, 2, 3    | 55.9                                        | 4.6 (2H, s)                                        |
| 10          | 52.6             | 4.29, 2H, d (4.8)       |                                     | 3, 4, 5    | 55.1                                        | 4.52 (2H, s)                                       |
| 11          | 62.2             | 4.05, 3H, s             |                                     | 3          | 63.1                                        | 4.12 (3H, s)                                       |

**Table S2.8** Summarized NMR signals for <sup>13</sup>C, <sup>1</sup>H, <sup>1</sup>H-<sup>1</sup>H COSY, HMBC for **11** recorded in DMSO-d<sub>6</sub>. Compound from literature <sup>[13]</sup> was measured in CDCl<sub>3</sub>.

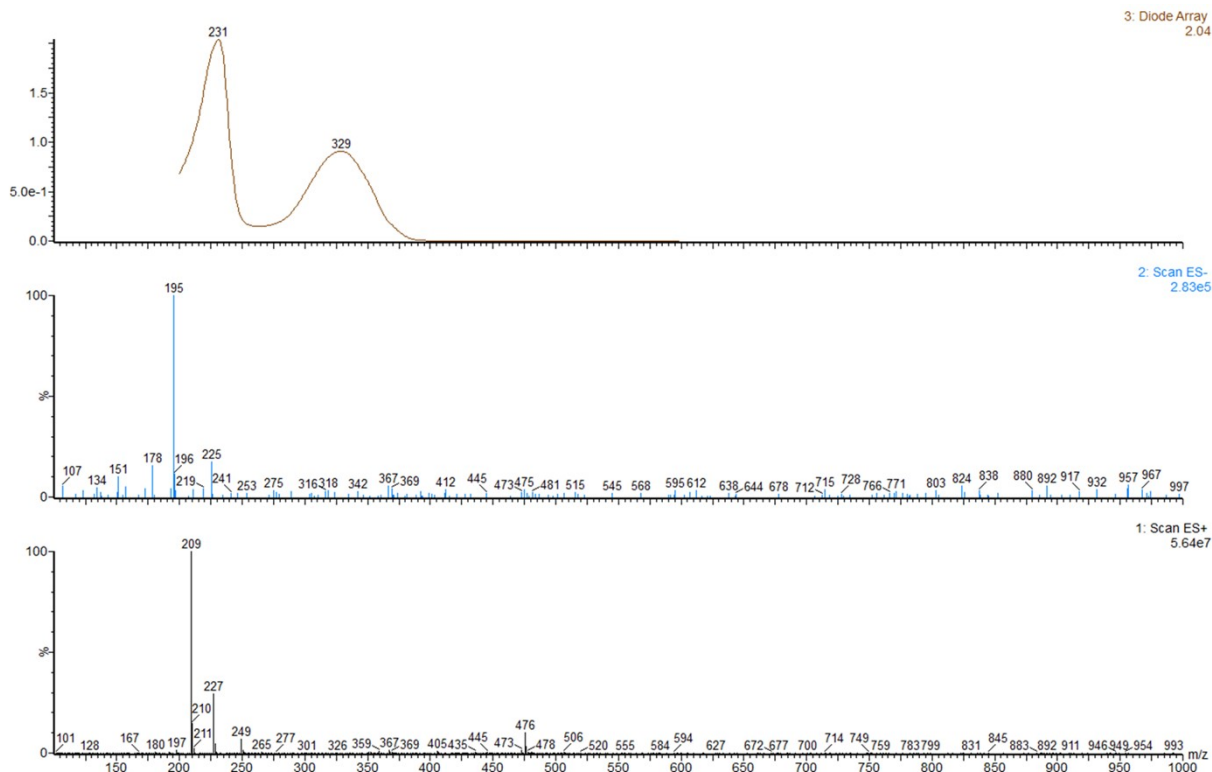

Figure S2.50 UV-absorption (top) and fragmentation pattern of **1H** in ES<sup>-</sup> (middle) and ES<sup>+</sup> TIC (bottom) by LR-LCMS.

## Elemental Composition Report

Page 1

### Single Mass Analysis

Tolerance = 20.0 PPM / DBE: min = -1.5, max = 50.0

Element prediction: Off

Number of isotope peaks used for i-FIT = 3

Monoisotopic Mass, Odd and Even Electron Ions

290 formula(e) evaluated with 9 results within limits (up to 30 closest results for each mass)

Elements Used:

C: 0-80 H: 0-110 N: 0-16 O: 0-10

Sun

QToF Premier HAB321

YS 023 761 (7.790) AM (Gen,3, 70.00, Ht,10000.0,556.28,0.70,LS 10)

1: TOF MS ES+  
1.66e+002

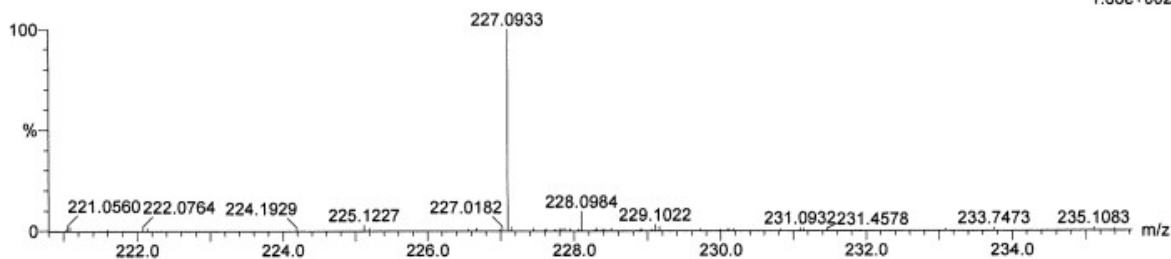

Minimum: -1.5  
Maximum: 5.0 20.0 50.0

| Mass     | Calc. Mass | mDa  | PPM  | DBE | i-FIT | i-FIT (Norm) | Formula      |
|----------|------------|------|------|-----|-------|--------------|--------------|
| 227.0933 | 227.0933   | 0.0  | 0.0  | 9.5 | 38.8  | 1.8          | C12 H11 N4 O |
|          | 227.0946   | -1.3 | -5.7 | 9.0 | 39.2  | 2.2          | C14 H13 N O2 |
|          | 227.0919   | 1.4  | 6.2  | 4.5 | 38.1  | 1.0          | C11 H15 O5   |

Figure S2.51 HRMS data for **1H**;  $m/z$  (M+H)<sup>+</sup> calc. mass is 227.0919, 227.0933 was found.

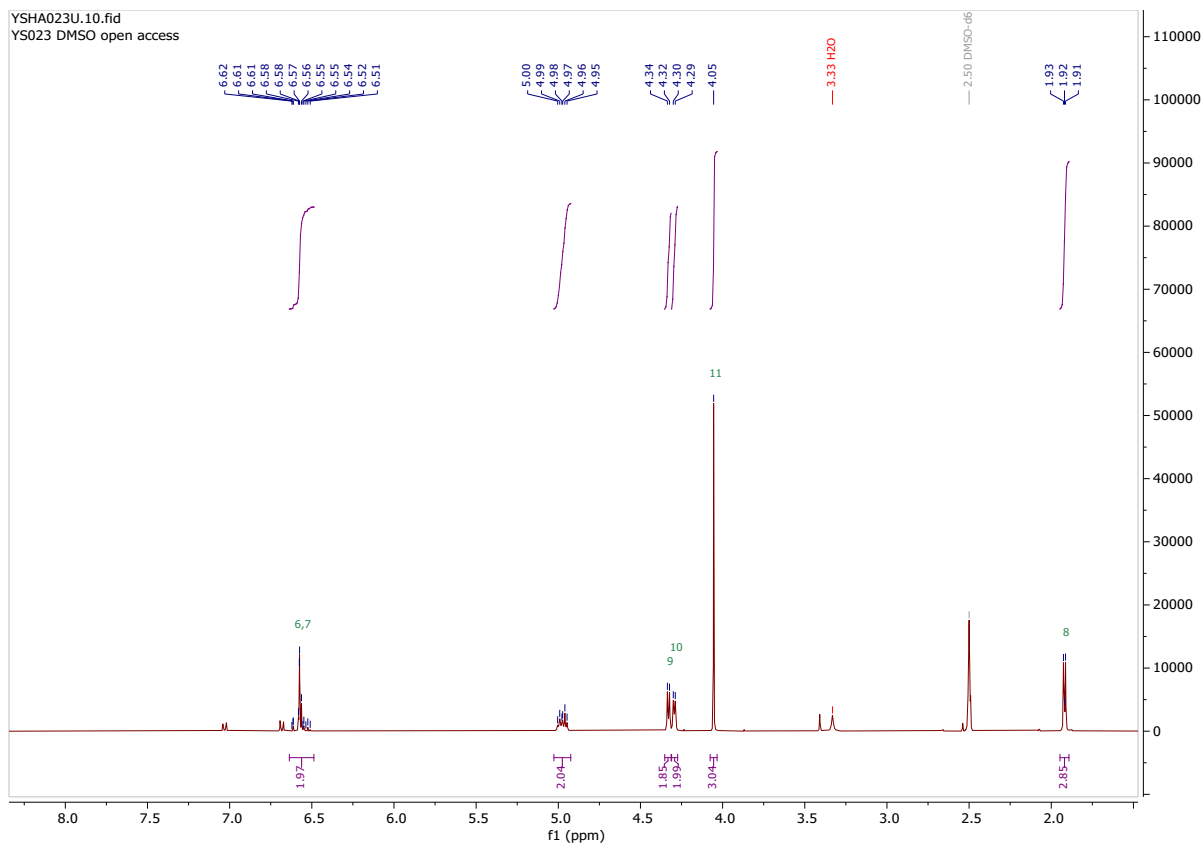

Figure S2.52 <sup>1</sup>H-NMR of **11** recorded at 400 MHz in DMSO-d<sub>6</sub>.

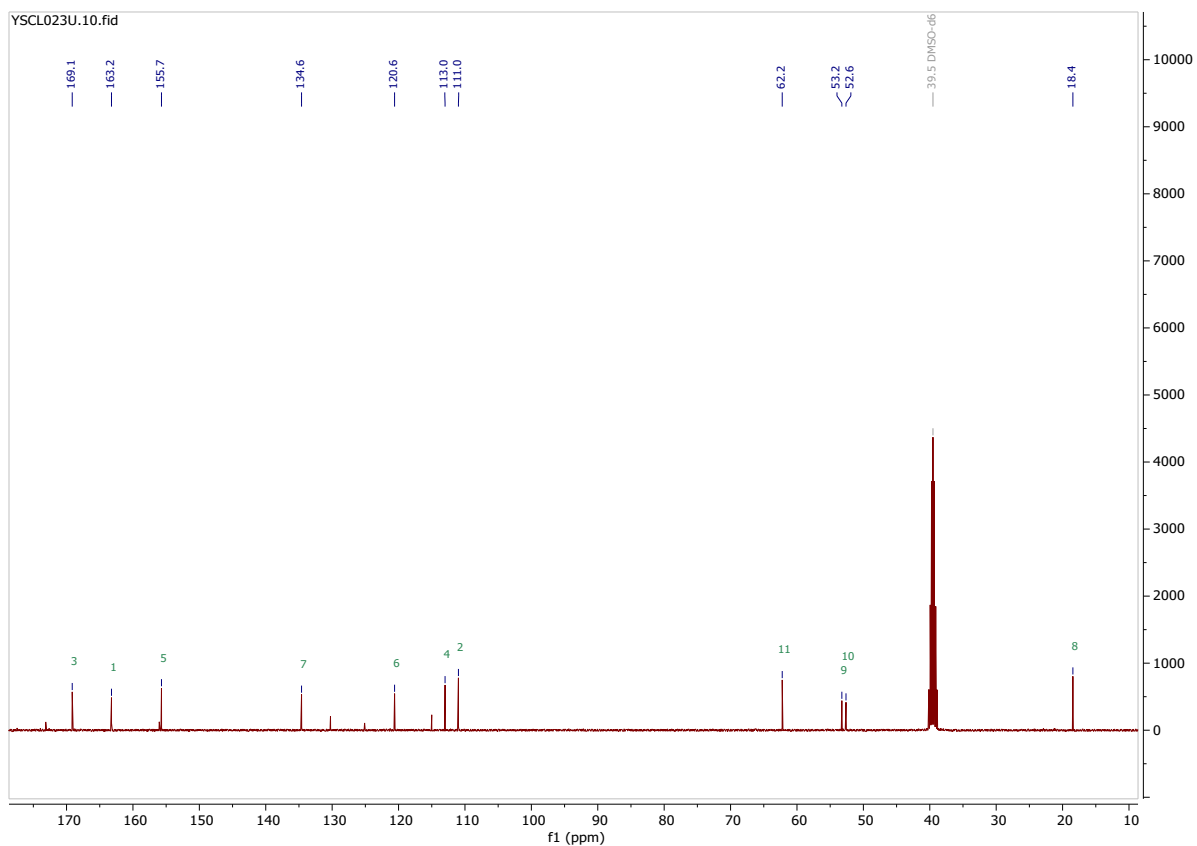

Figure S2.53 <sup>13</sup>C-NMR of **11** recorded at 100 MHz in DMSO-d<sub>6</sub>.

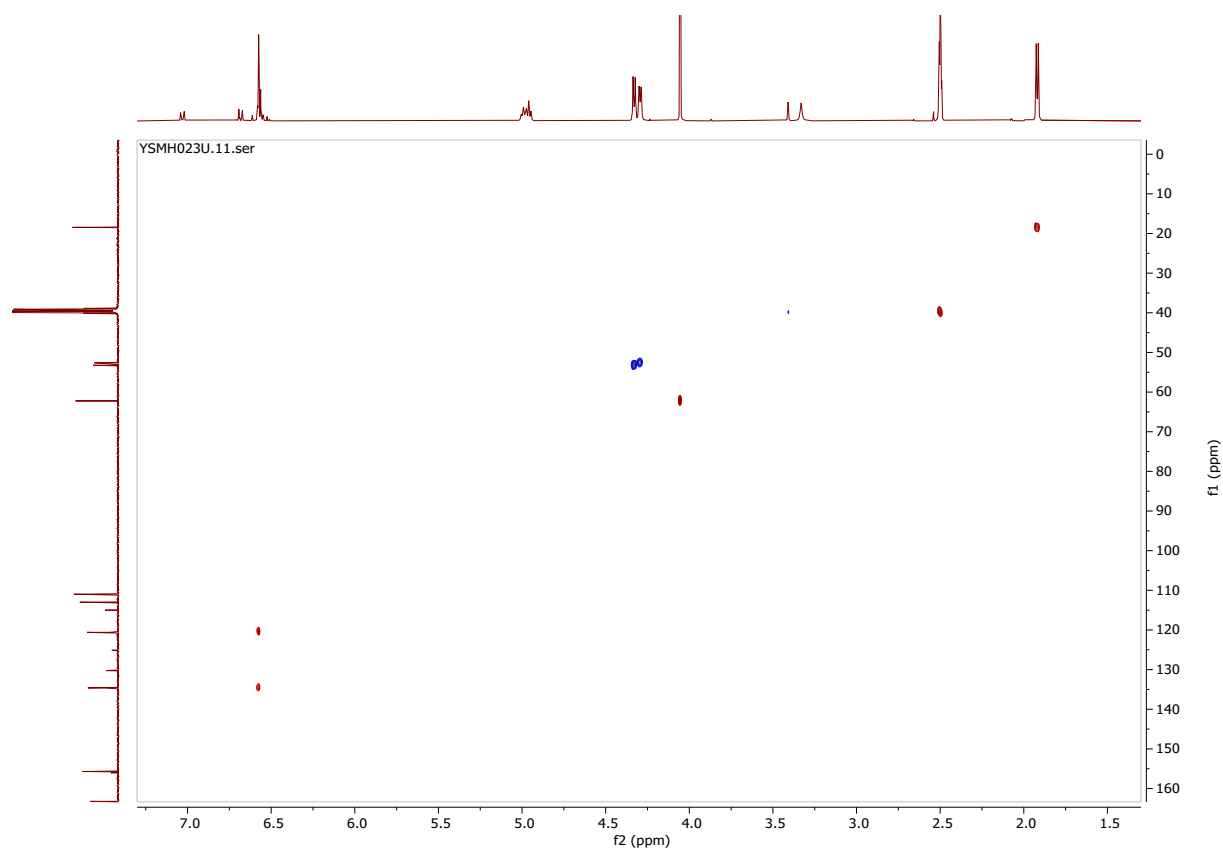

Figure S2.54 HSQC-spectrum of **1I** recorded at 400, 100 MHz in DMSO-d<sub>6</sub>.

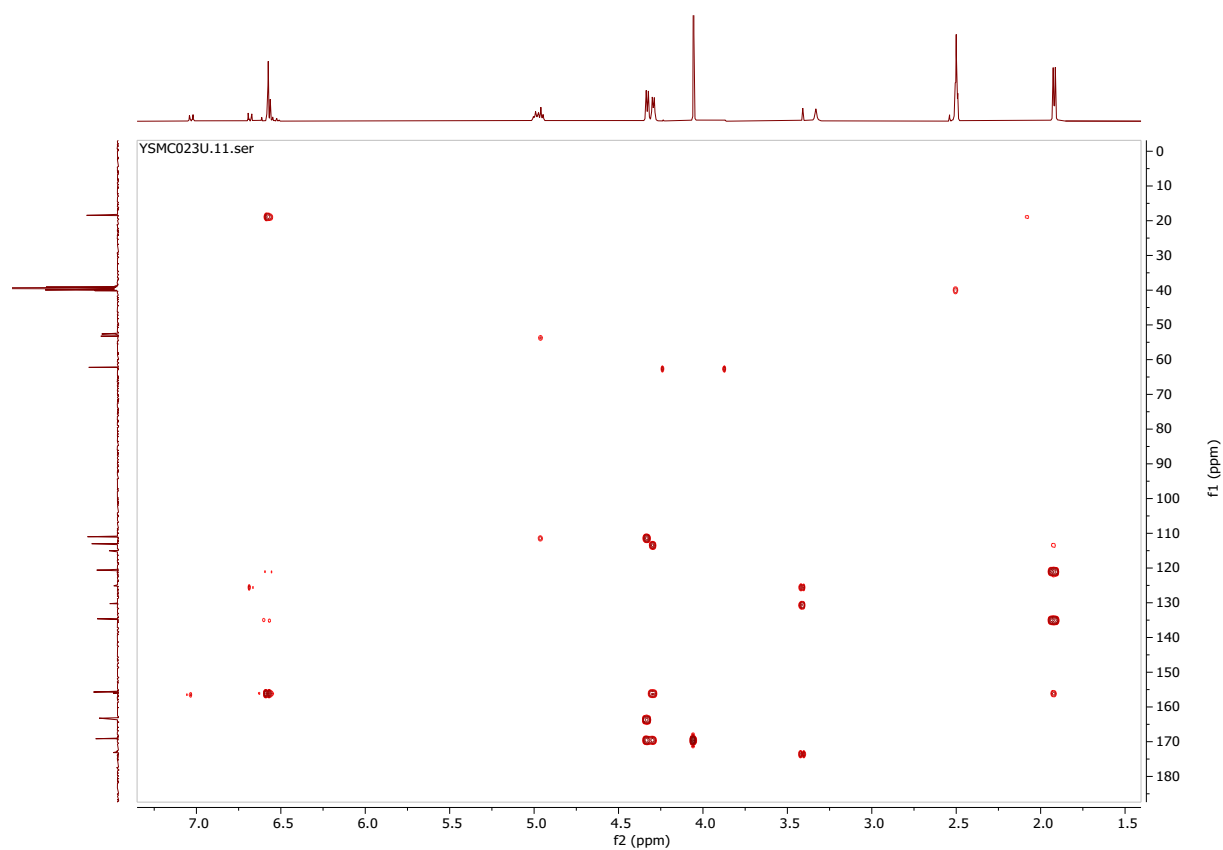

Figure S2.55 HMBC-spectrum of **1I** recorded at 400, 100 MHz in DMSO-d<sub>6</sub>.

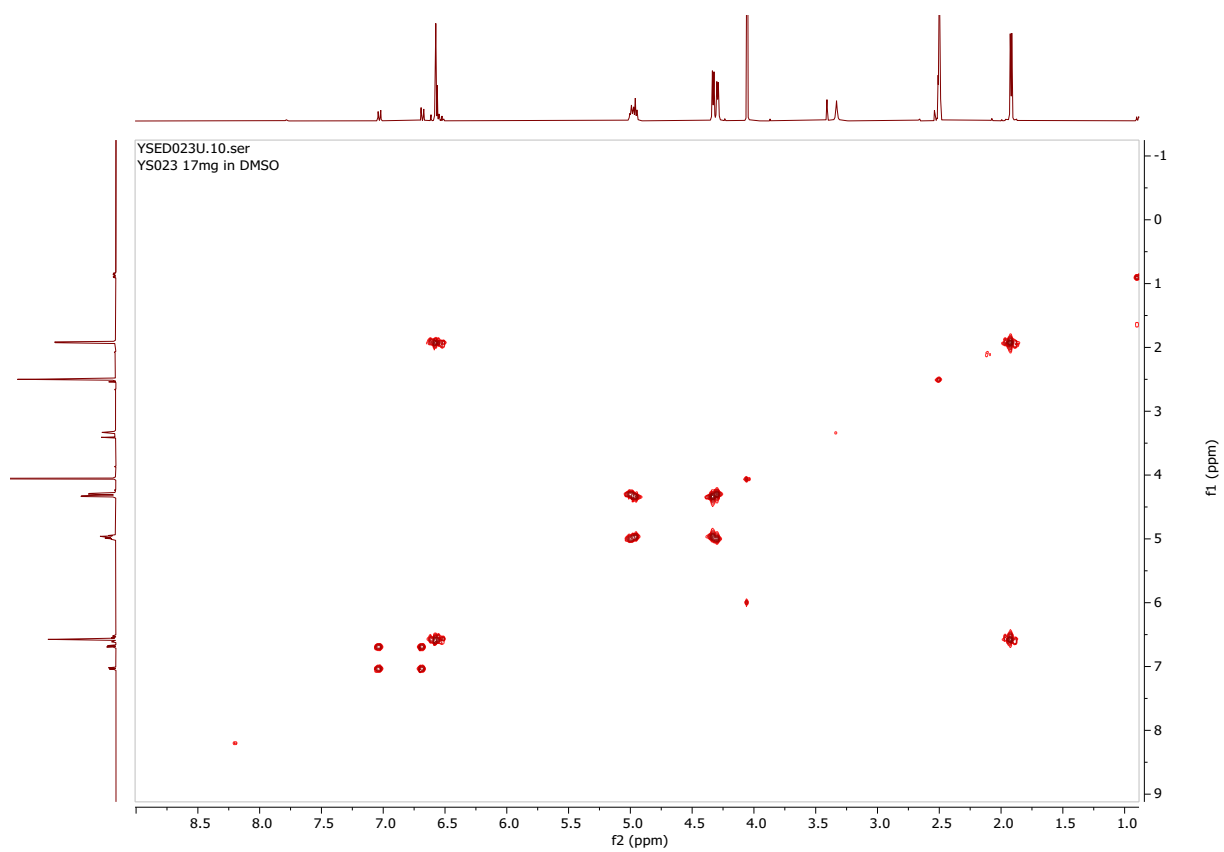

**Figure S2.56**  $^1\text{H}$ ,  $^1\text{H}$ -COSY-spectrum of **1I** recorded at 400 MHz in  $\text{DMSO-d}_6$ .



## Compound 1H

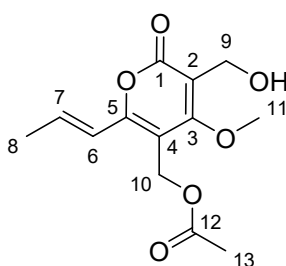

**1H**

Chemical Formula: C<sub>13</sub>H<sub>16</sub>O<sub>6</sub>

Exact Mass: 268.0947

| Compound 1H |                  |                                      |                                     |             |                                             |                                                    |
|-------------|------------------|--------------------------------------|-------------------------------------|-------------|---------------------------------------------|----------------------------------------------------|
| Pos.        | $\delta_C$ / ppm | $\delta_H$ / ppm (J/Hz)              | <sup>1</sup> H- <sup>1</sup> H COSY | HMBC (H-C)  | $\delta_C$ / ppm literature <sup>[13]</sup> | $\delta_H$ / ppm (J/Hz) literature <sup>[13]</sup> |
| 1           | 164.8            |                                      |                                     |             | 164.7                                       |                                                    |
| 2           | 111.0            |                                      |                                     |             | 110.8                                       |                                                    |
| 3           | 168.9            |                                      |                                     |             | 168.8                                       |                                                    |
| 4           | 108.0            |                                      |                                     |             | 107.9                                       |                                                    |
| 5           | 158.1            |                                      |                                     |             | 158.0                                       |                                                    |
| 6           | 119.5            | 6.39, 1H, dddd (15.3, 1.7, 1.7, 1.7) | 7, 8                                | 5, 7, 8     | 119.3                                       | 6.39 (dq, 15.1, 1.7)                               |
| 7           | 138.4            | 6.86, 1H, dddd (15.3, 7.0, 7.0, 7.0) | 6, 8                                | 5, 6, 8     | 138.2                                       | 6.86 (dq, 15.1, 7.0)                               |
| 8           | 19.0             | 1.96, 3H, dd (7.0, 1.7)              | 6, 7                                | 6, 7        | 18.9                                        | 1.97(3H, dd, 7.0, 1.7)                             |
| 9           | 56.1             | 4.59, 2H, s                          |                                     | 1, 2, 3     | 55.9                                        | 4.59, (2H, s)                                      |
| 10          | 56.3             | 4.97, 2H, s                          |                                     | 3, 4, 5, 12 | 56.2                                        | 4.97, (2H, s)                                      |
| 11          | 63.3             | 4.06, 3H, s                          |                                     | 3           | 63.2                                        | 4.07 (s)                                           |
| 12          | 170.9            |                                      |                                     |             | 170.8                                       |                                                    |
| 13          | 21.0             | 2.08, 3H, s                          |                                     | 12          | 20.9                                        | 2.08(3H, s)                                        |

**Table S2.9** Summarized NMR signals for <sup>13</sup>C, <sup>1</sup>H, <sup>1</sup>H-<sup>1</sup>H COSY, HMBC for **1H** recorded in CDCl<sub>3</sub>. Compound from literature <sup>[13]</sup> was measured in CDCl<sub>3</sub>.

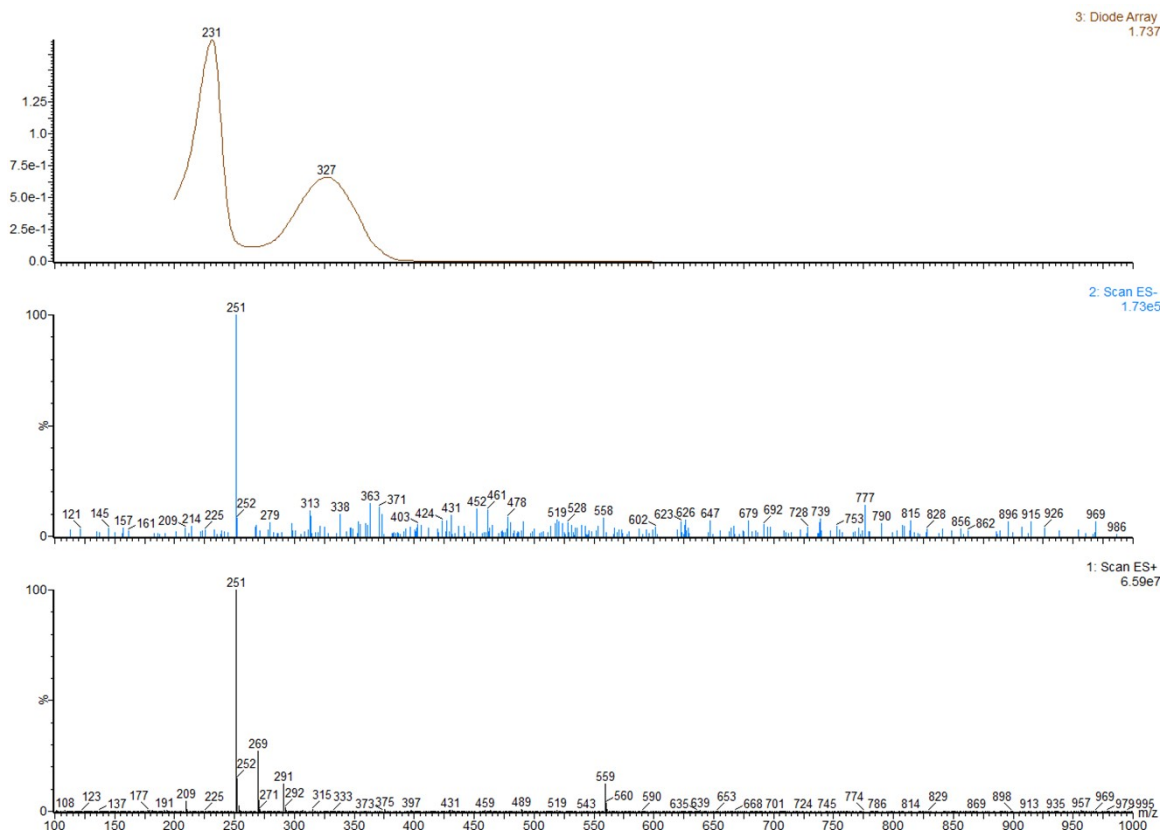

Figure S2.57 UV-absorption (top) and fragmentation pattern of **1H** in ES<sup>-</sup> (middle) and ES<sup>+</sup> TIC (bottom) by LR-LCMS.

## Elemental Composition Report

Page 1

### Single Mass Analysis

Tolerance = 20.0 PPM / DBE: min = -1.5, max = 50.0

Element prediction: Off

Number of isotope peaks used for i-FIT = 3

Monoisotopic Mass, Even Electron Ions

87 formula(e) evaluated with 4 results within limits (up to 30 closest results for each mass)

Elements Used:

C: 0-85 H: 0-110 O: 0-9 S: 0-2

Sun

QToF Premier HAB321

YS 029b 514 (5.256) AM (Cen,5, 85.00, Ht,10000.0,556.28,0.70,LS 10)

1: TOF MS ES+  
1.31e+002

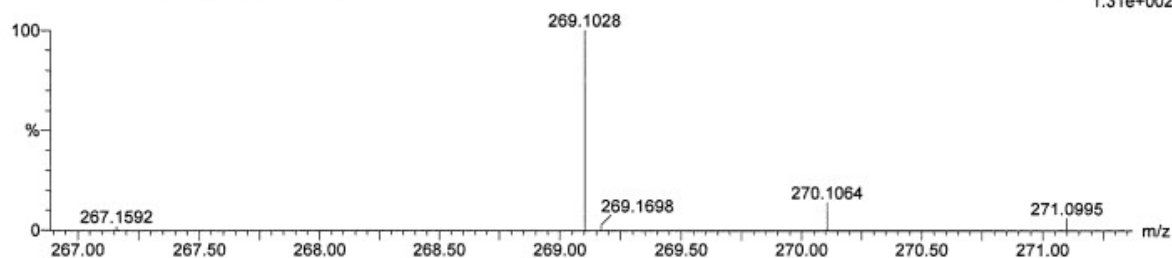

Minimum:

Maximum: 5.0 20.0 -1.5

| Mass     | Calc. Mass | mDa  | PPM   | DBE | i-FIT | i-FIT (Norm) | Formula      |
|----------|------------|------|-------|-----|-------|--------------|--------------|
| 269.1028 | 269.1025   | 0.3  | 1.1   | 5.5 | 8.8   | 1.9          | C13 H17 O6   |
|          | 269.1034   | -0.6 | -2.2  | 4.5 | 8.1   | 1.2          | C14 H21 O S2 |
|          | 269.1000   | 2.8  | 10.4  | 9.5 | 8.5   | 1.6          | C17 H17 O S  |
|          | 269.1059   | -3.1 | -11.5 | 0.5 | 7.9   | 1.0          | C10 H21 O6 S |

Figure S2.58 HRMS data for **1H**;  $m/z$  (M+H)<sup>+</sup> calc. mass is 269.1025, 269.1028 was found.

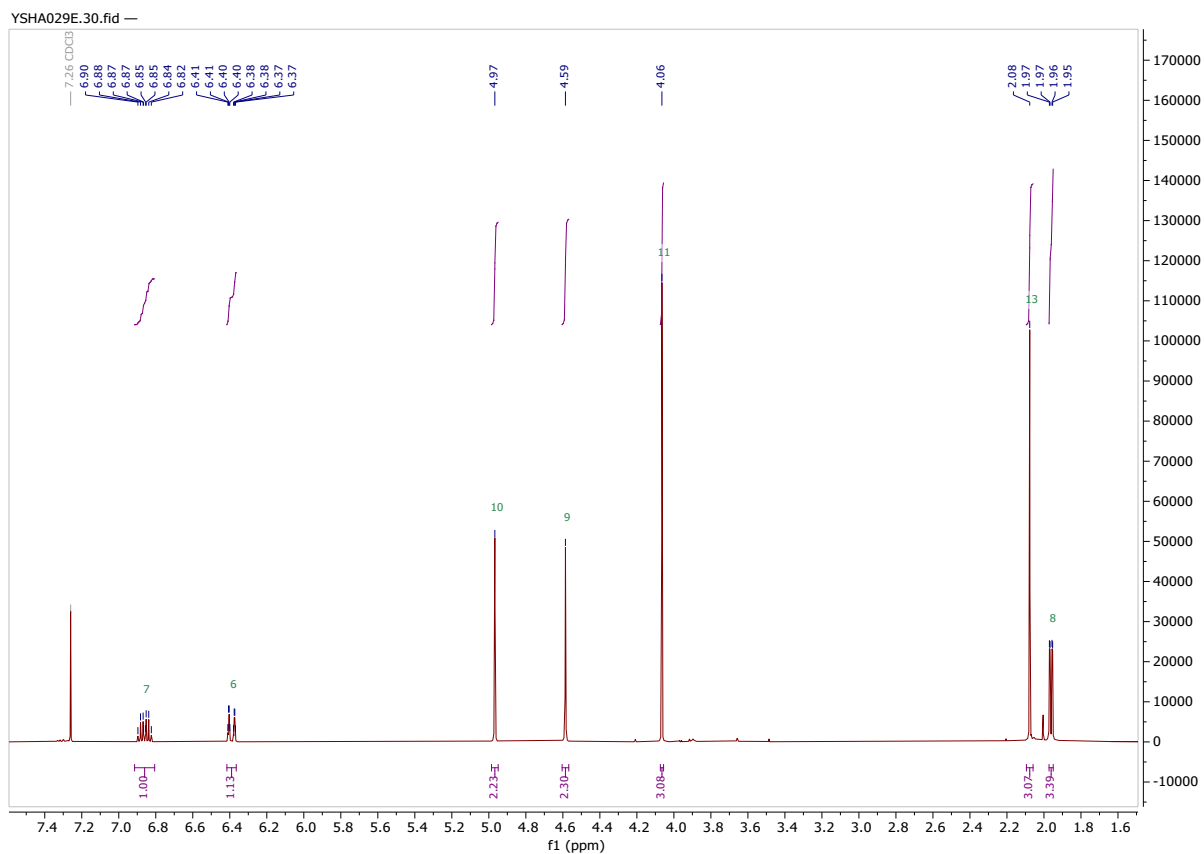

Figure S2.59 <sup>1</sup>H-NMR of **1H** recorded at 500 MHz in CDCl<sub>3</sub>.

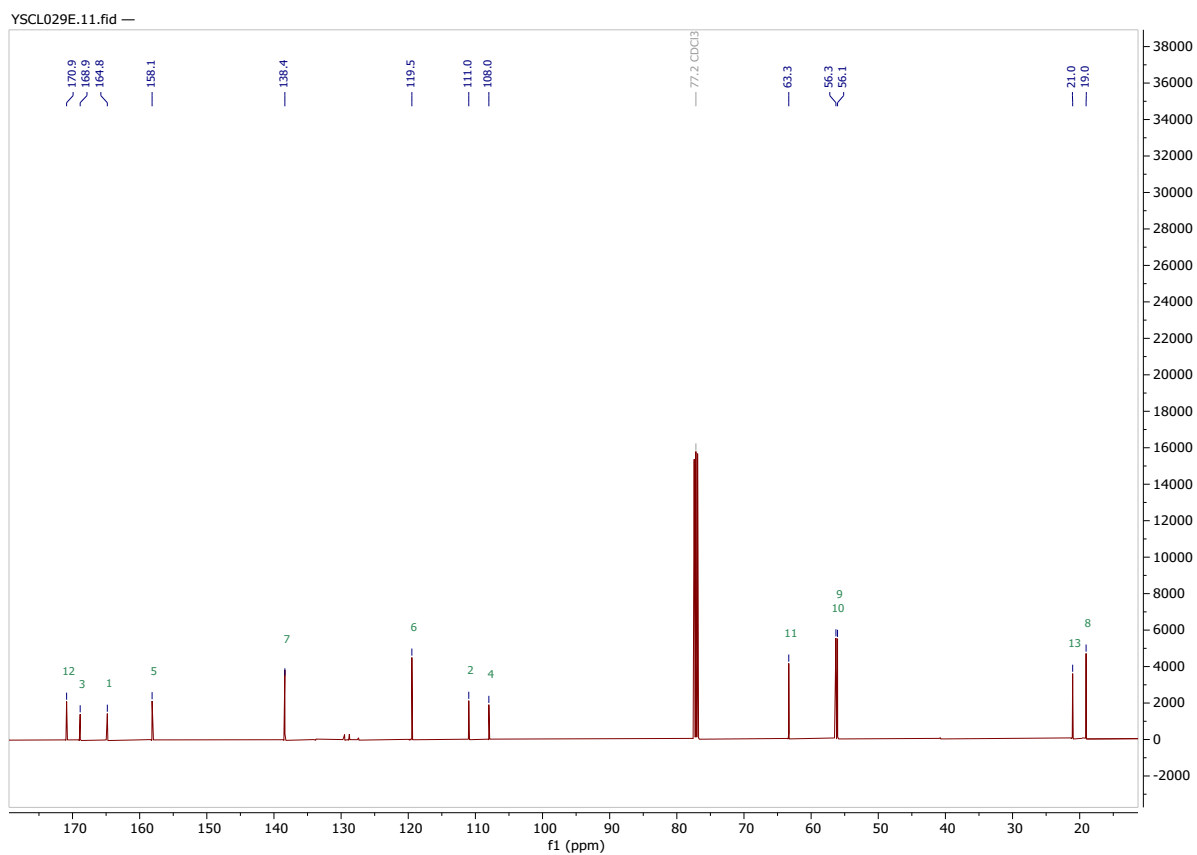

Figure S2.60 <sup>13</sup>C-NMR of **1H** recorded at 125 MHz in CDCl<sub>3</sub>.

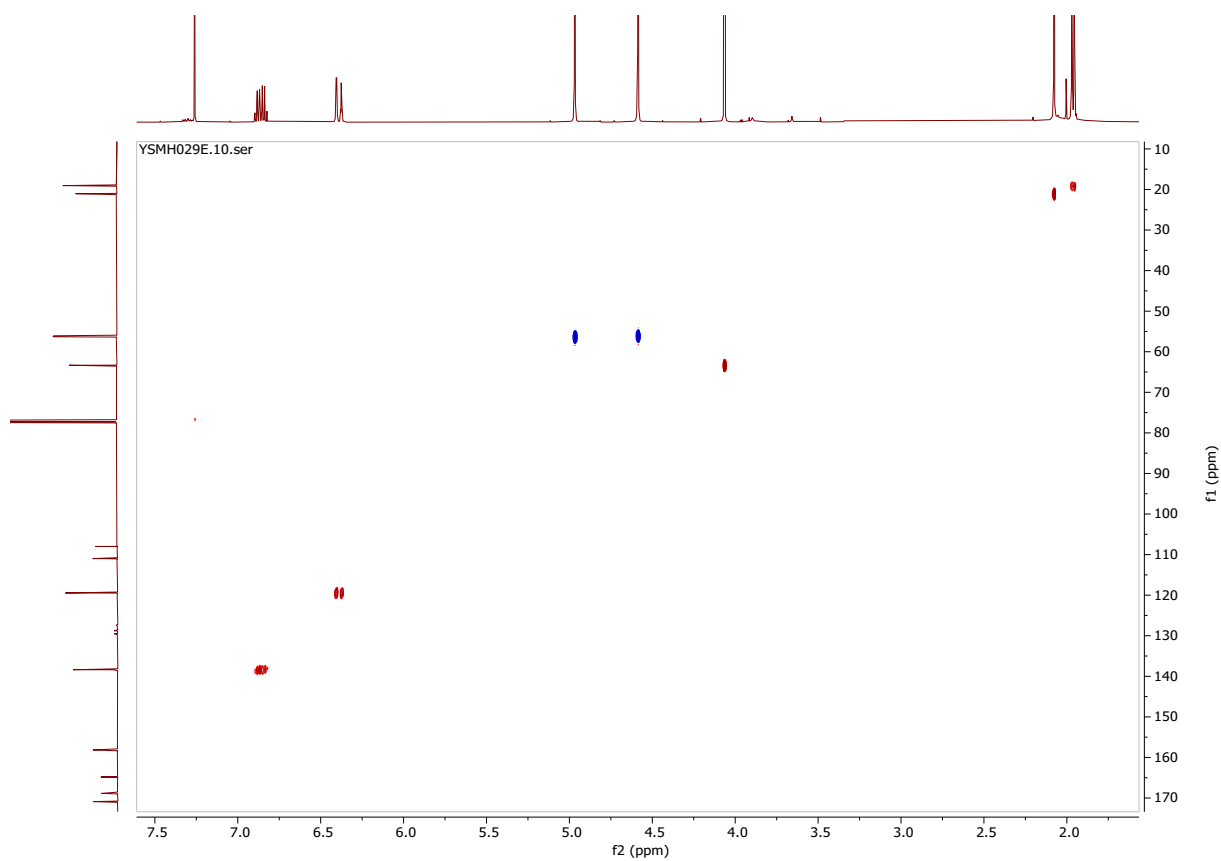

Figure S2.61 HSQC-spectrum of **1H** recorded at 500, 125 MHz in CDCl<sub>3</sub>.

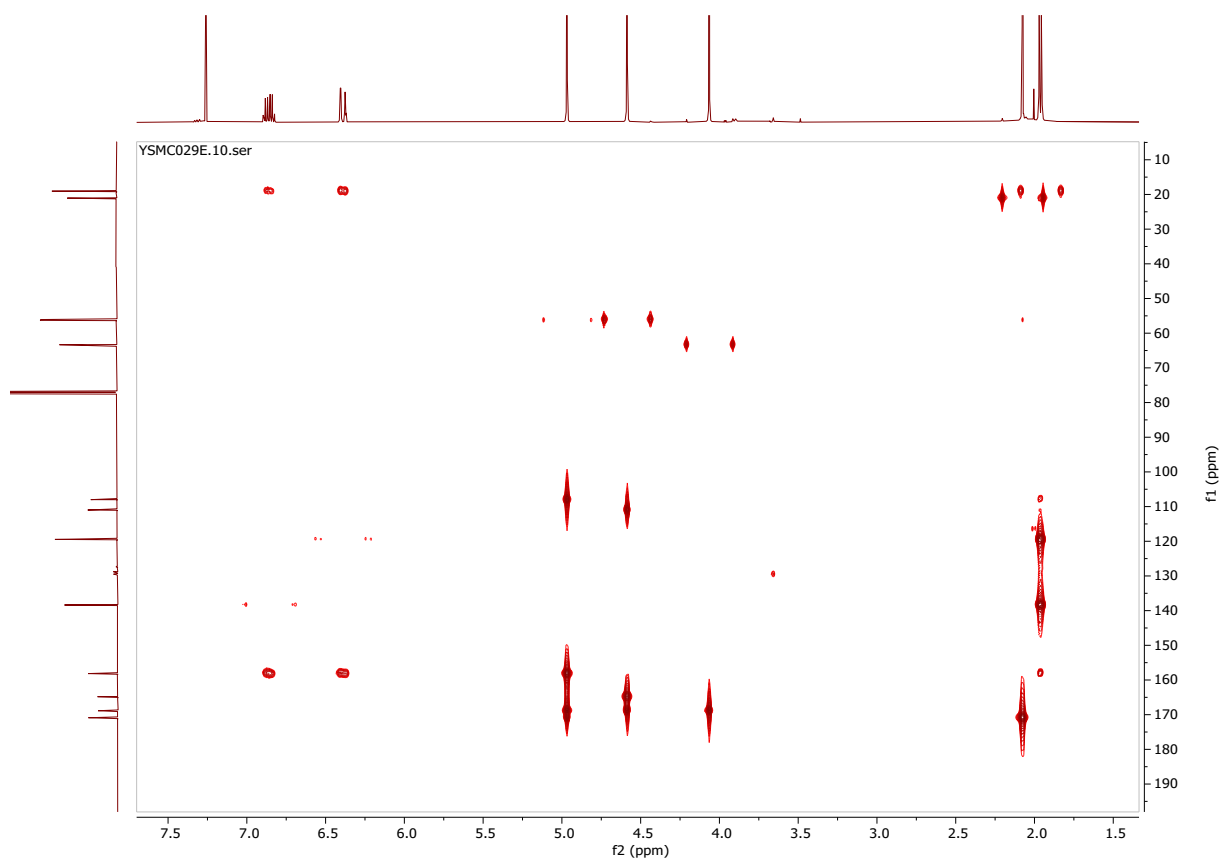

Figure S2.62 HMBC-spectrum of **1H** recorded at 500, 125 MHz in CDCl<sub>3</sub>.

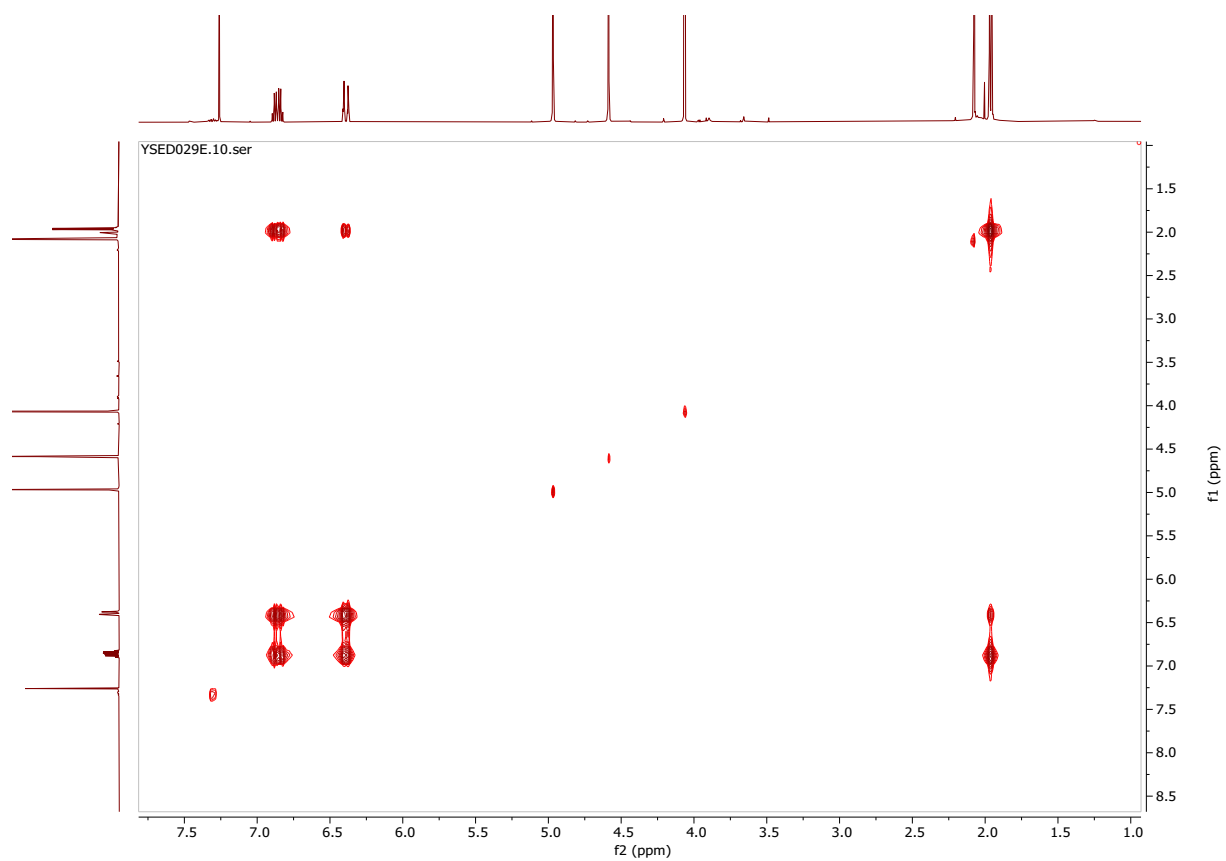

**Figure S2.63**  $^1\text{H}$ ,  $^1\text{H}$ -COSY-spectrum of **1H** recorded at 500 MHz in  $\text{CDCl}_3$ .

## Compound 12

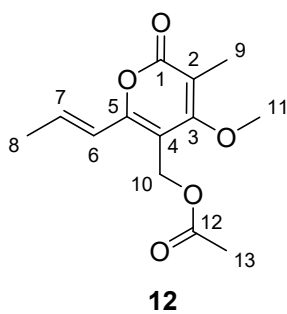

Chemical Formula: C<sub>13</sub>H<sub>16</sub>O<sub>5</sub>

Exact Mass: 252.0998

| Compound 12 |                  |                                      |                                     |             |
|-------------|------------------|--------------------------------------|-------------------------------------|-------------|
| Pos.        | $\delta_C$ / ppm | $\delta_H$ / ppm (J/Hz)              | <sup>1</sup> H- <sup>1</sup> H COSY | HMBC (H-C)  |
| 1           | 166.7            |                                      |                                     |             |
| 2           | 110.9            |                                      |                                     |             |
| 3           | 169.8            |                                      |                                     |             |
| 4           | 110.0            |                                      |                                     |             |
| 5           | 157.7            |                                      |                                     |             |
| 6           | 120.9            | 6.54, 1H, dddd (15.3, 1.7, 1.7, 1.7) | 7, 8                                | 5, 7, 8     |
| 7           | 137.2            | 6.75, 1H, dddd (15.3, 7.0, 6.9, 6.9) | 6, 8                                | 5, 8        |
| 8           | 18.8             | 1.95, 3H, dd (7.0, 1.7)              | 6, 7                                | 6, 7        |
| 9           | 10.6             | 2.04, 3H, s                          |                                     | 1, 2, 3     |
| 10          | 57.3             | 5.01, 2H, s                          |                                     | 3, 4, 5, 12 |
| 11          | 62.1             | 3.92, 3H, s                          |                                     | 3           |
| 12          | 172.4            |                                      |                                     |             |
| 13          | 20.7             | 2.05, 3H, s                          |                                     | 12          |

**Table S2.10** Summarized NMR signals for <sup>13</sup>C, <sup>1</sup>H, <sup>1</sup>H-<sup>1</sup>H COSY, HMBC for **12** recorded in CD<sub>3</sub>OD.

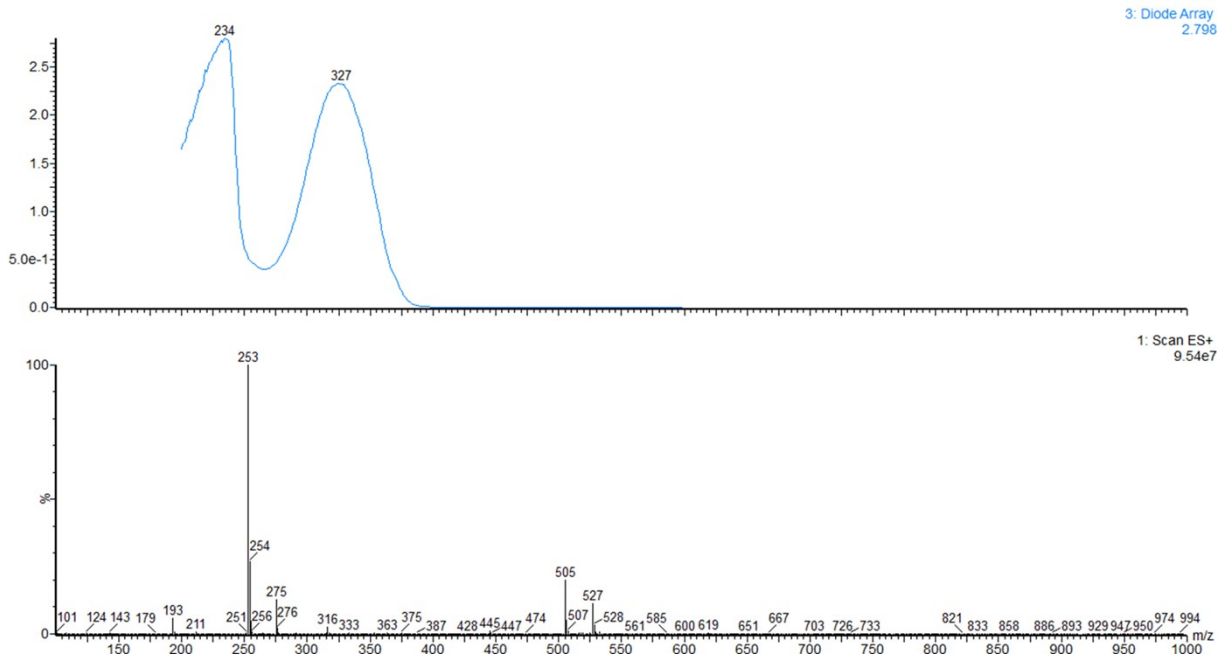

Figure S2.64 UV-absorption (top) and fragmentation pattern of **12** in ES<sup>+</sup> TIC (bottom) by LR-LCMS.

## Elemental Composition Report

Page 1

### Single Mass Analysis (displaying only valid results)

Tolerance = 5.0 PPM / DBE: min = -1.5, max = 50.0

Selected filters: None

Monoisotopic Mass, Even Electron Ions

186 formula(e) evaluated with 2 results within limits (up to 40 closest results for each mass)

Elements Used:

C: 0-72 H: 0-50 N: 0-1 O: 0-6 Na: 0-1 S: 0-1

Sun LCT Premier KD070  
YS 037 15 (0.334) AM (Cen,4, 90.00, Ar,10000.0,556.28,0.70,LS 10)

1: TOF MS ES+  
492

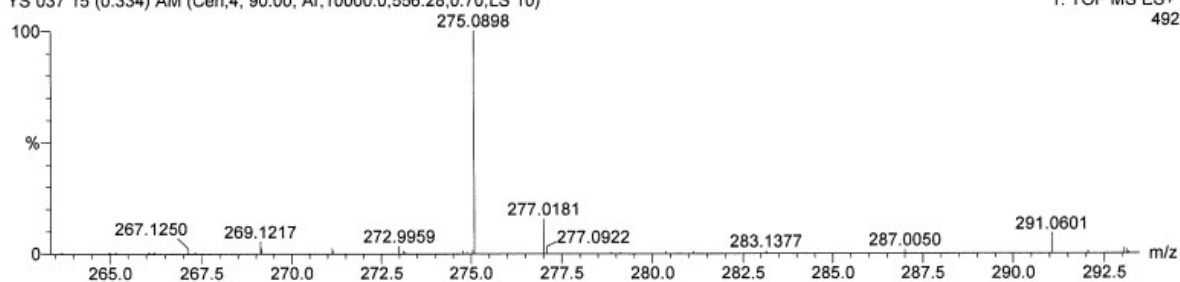

| Mass     | Calc. Mass | mDa | PPM | DBE  | i-FIT     | Formula       |
|----------|------------|-----|-----|------|-----------|---------------|
| 275.0898 | 275.0895   | 0.3 | 1.1 | 5.5  | 2773237.3 | C13 H16 O5 Na |
|          | 275.0894   | 0.4 | 1.5 | 12.5 | 2773249.3 | C19 H15 S     |

Figure S2.65 HRMS data for **12**;  $m/z$  (M+Na) calc. mass is 275.0895, 275.0898 was found.

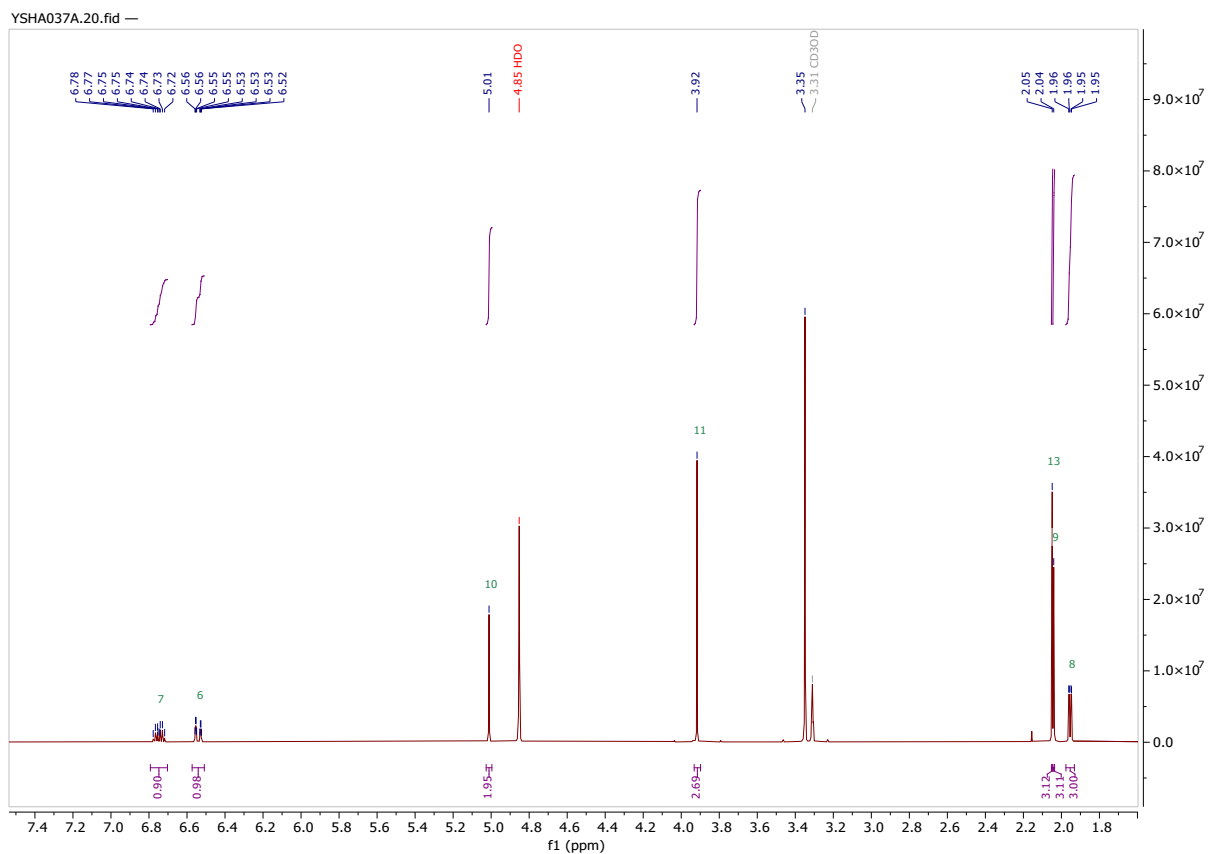

Figure S2.66 <sup>1</sup>H-NMR of **12** recorded at 600 MHz in CD<sub>3</sub>OD.

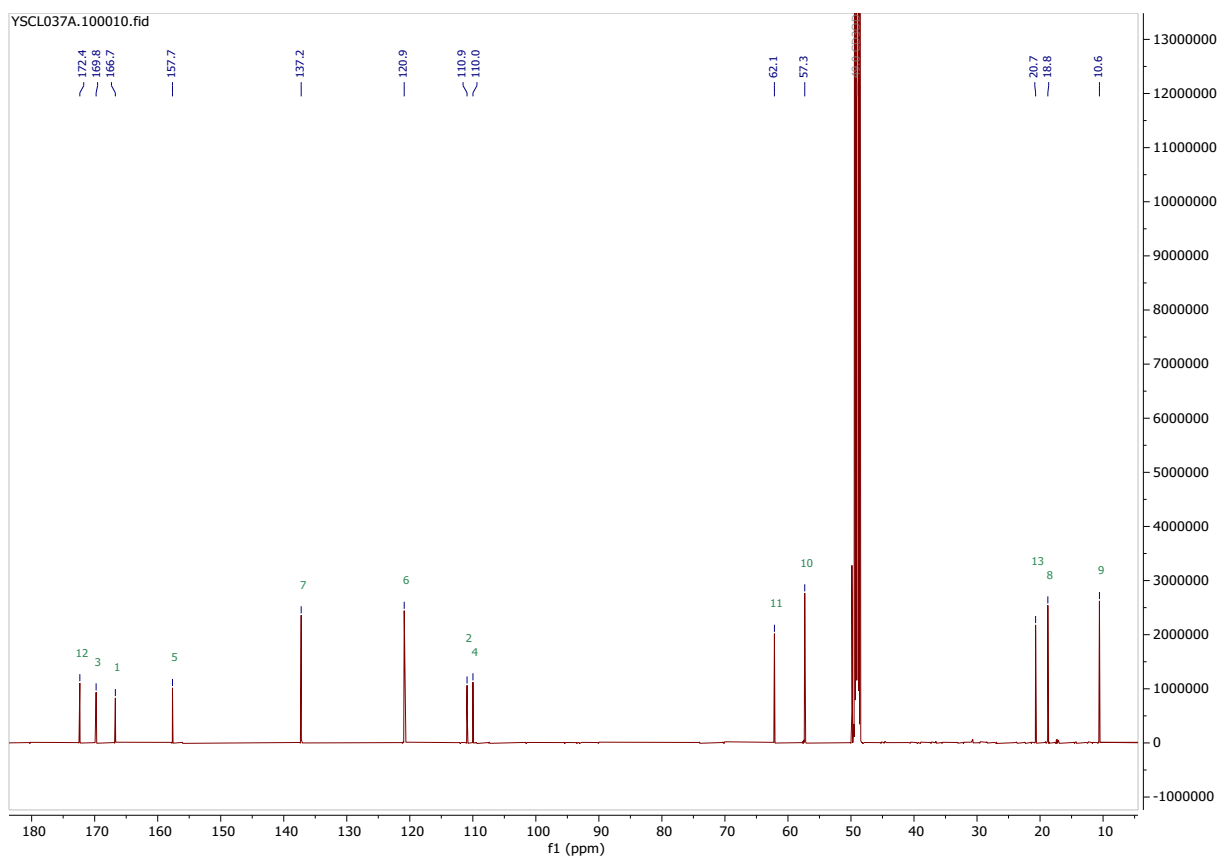

Figure S2.67 <sup>13</sup>C-NMR of **12** recorded at 150 MHz in CD<sub>3</sub>OD.



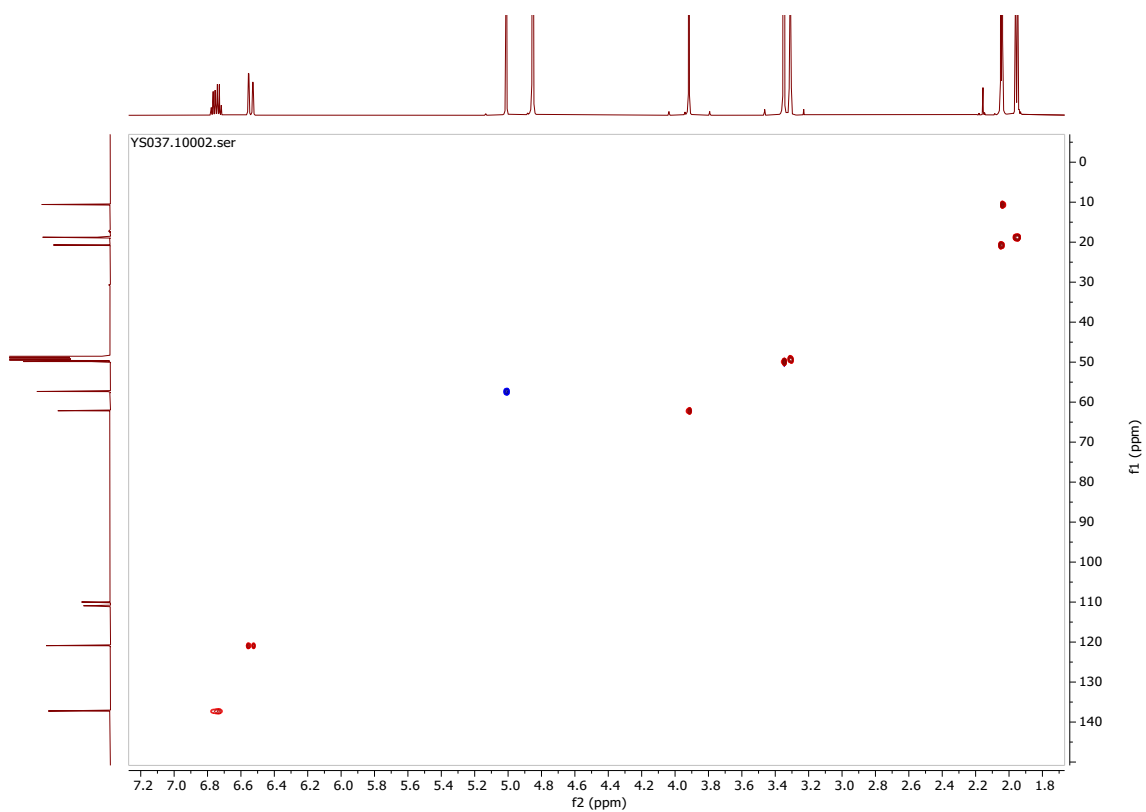

Figure S2.68 HSQC-spectrum of **12** recorded at 600, 150 MHz in CD<sub>3</sub>OD.

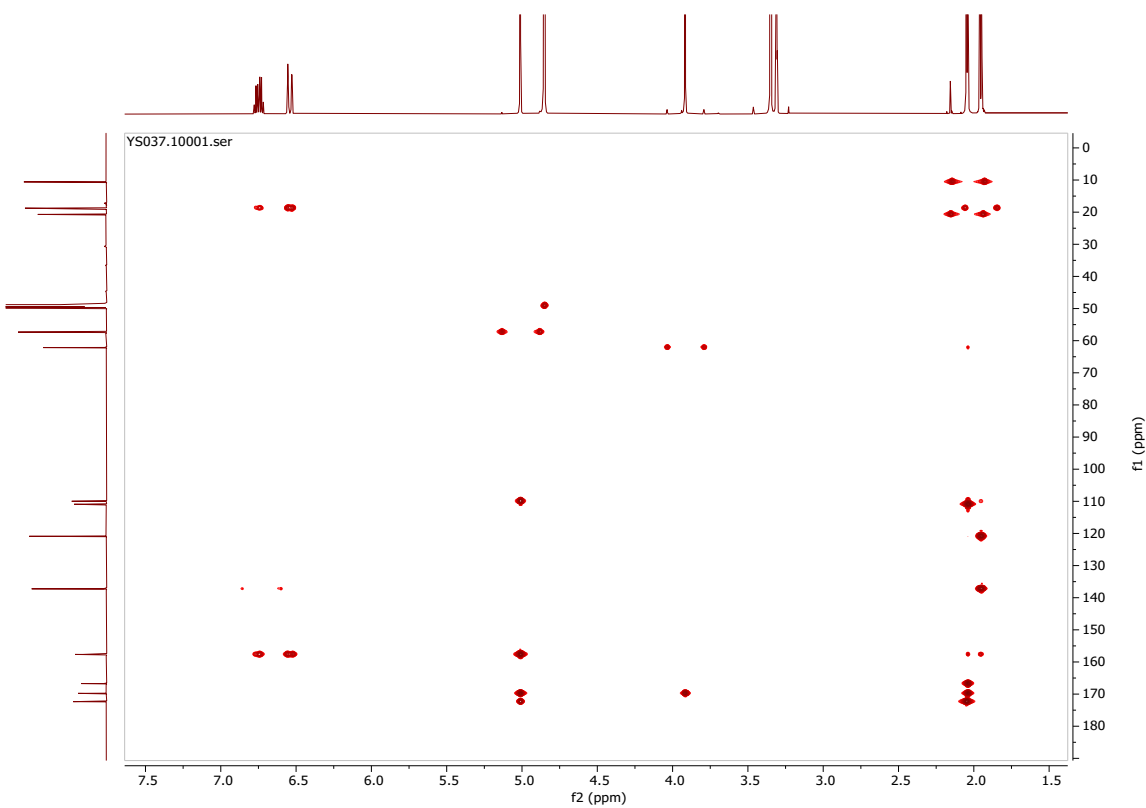

Figure S2.69 HMBC-spectrum of **12** recorded at 600, 150 MHz in CD<sub>3</sub>OD.

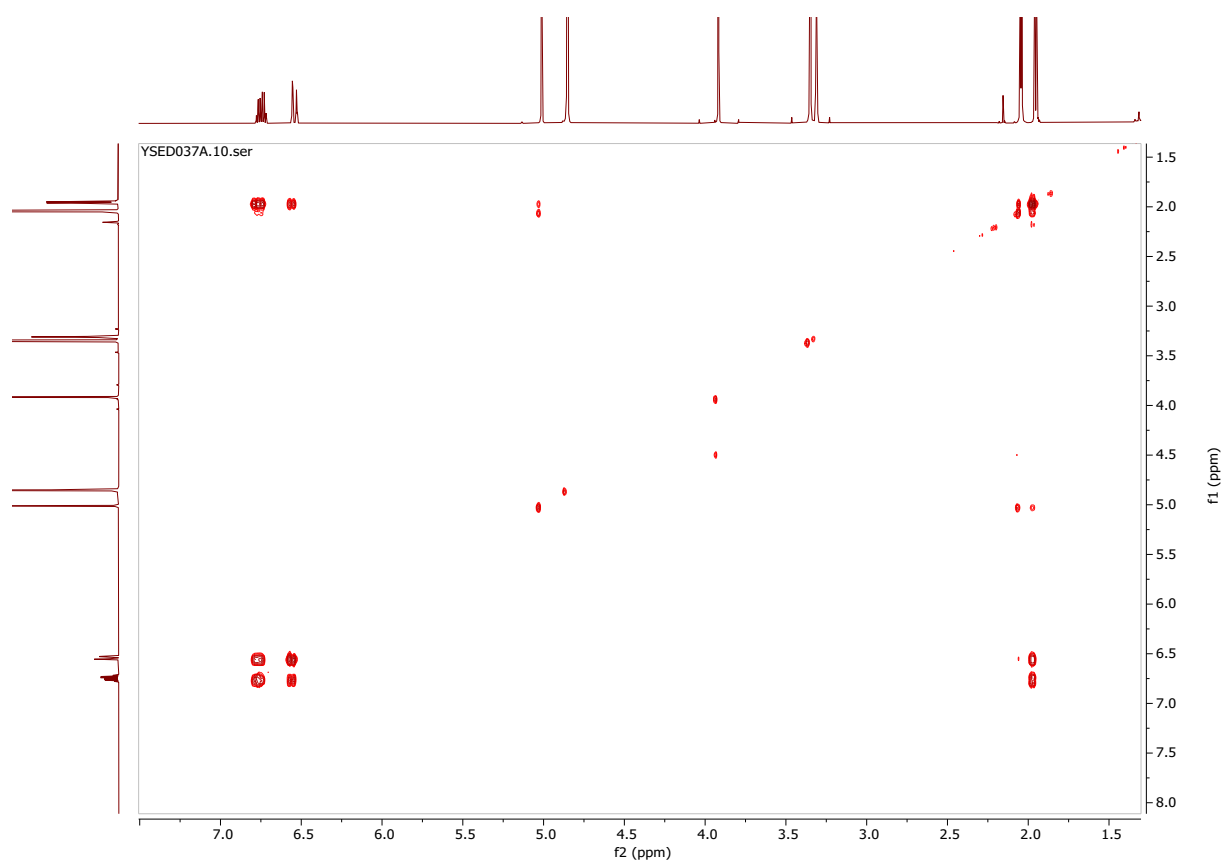

**Figure S2.70**  $^1\text{H}$ ,  $^1\text{H}$ -COSY-spectrum of **12** recorded at 600 MHz in  $\text{CD}_3\text{OD}$ .

## Compound 13

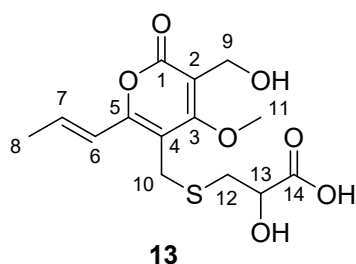

Chemical Formula: C<sub>14</sub>H<sub>18</sub>O<sub>7</sub>S  
Exact Mass: 330.0773

| Compound 13 |                  |                                                     |                                     |                          |
|-------------|------------------|-----------------------------------------------------|-------------------------------------|--------------------------|
| Pos.        | $\delta_C$ / ppm | $\delta_H$ / ppm (J/Hz)                             | <sup>1</sup> H- <sup>1</sup> H COSY | HMBC (H-C)               |
| 1           | 166.5            |                                                     |                                     |                          |
| 2           | 111.2            |                                                     |                                     |                          |
| 3           | 171.3            |                                                     |                                     |                          |
| 4           | 112.2            |                                                     |                                     |                          |
| 5           | 156.8            |                                                     |                                     |                          |
| 6           | 121.5            | 6.62, 1H, dddd (15.2, 1.7, 1.6, 1.6)                | 7, 8                                | 5, 7, 8                  |
| 7           | 137.1            | 6.73, 1H, dddd (15.3, 6.8, 6.8, 6.8)                | 6, 8                                | 5, 6, 8                  |
| 8           | 18.8             | 1.97, 3H, dd (6.9, 1.6)                             | 6, 7                                | 5, 6, 7                  |
| 9           | 55.3             | 4.54, 2H, s                                         |                                     | 1, 2, 3                  |
| 10          | 26.8             | 3.77, 2H, s                                         |                                     | 3, 4, 5, 12              |
| 11          | 63.7             | 4.21, 3H, s                                         |                                     | 3                        |
| 12          | 37.3             | 2.86, 1H, dd (14.1, 6.4)<br>3.0, 1H, dd (14.2, 4.1) | 12, 13<br>12, 13                    | 10, 13, 14<br>10, 13, 14 |
| 13          | 72.4             | 4.38, 1H, dd (6.5, 4.1)                             | 12                                  | 12, 14                   |
| 14          | 176.2            |                                                     |                                     |                          |

**Table S2.11** Summarized NMR signals for <sup>13</sup>C, <sup>1</sup>H, <sup>1</sup>H-<sup>1</sup>H COSY, HMBC for **13** recorded in CD<sub>3</sub>OD.

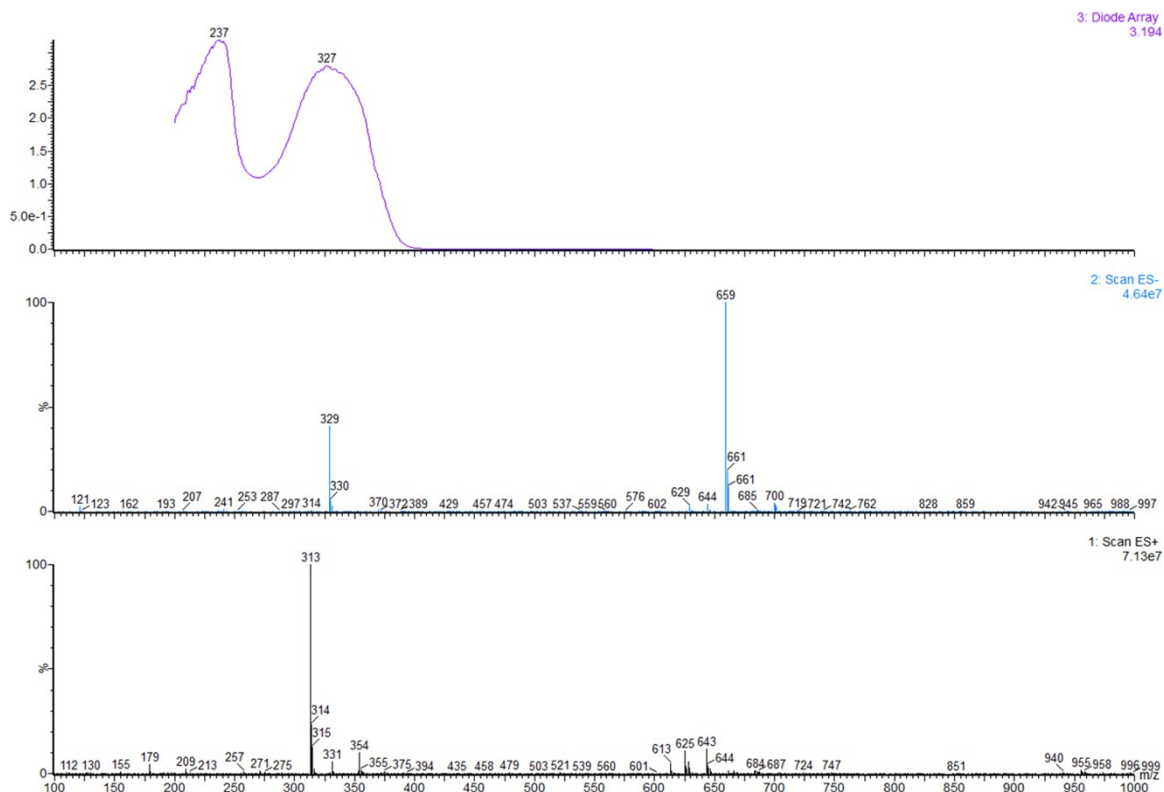

Figure S2.71 UV-absorption (top) and fragmentation pattern of **13** in ES<sup>-</sup> (middle) and ES<sup>+</sup> TIC (bottom) by LR-LCMS.

## Elemental Composition Report

Page 1

### Single Mass Analysis

Tolerance = 20.0 PPM / DBE: min = -1.5, max = 50.0

Element prediction: Off

Number of isotope peaks used for i-FIT = 3

Monoisotopic Mass, Even Electron Ions

116 formula(e) evaluated with 6 results within limits (up to 30 closest results for each mass)

Elements Used:

C: 0-85 H: 0-110 O: 0-7 S: 0-3

Sun

QToF Premier HAB321

YS 019d 433 (4.428) AM (Cen,5, 85.00, Ht,10000.0,554.26,0.70,LS 10)

1: TOF MS ES-  
8.28e+001

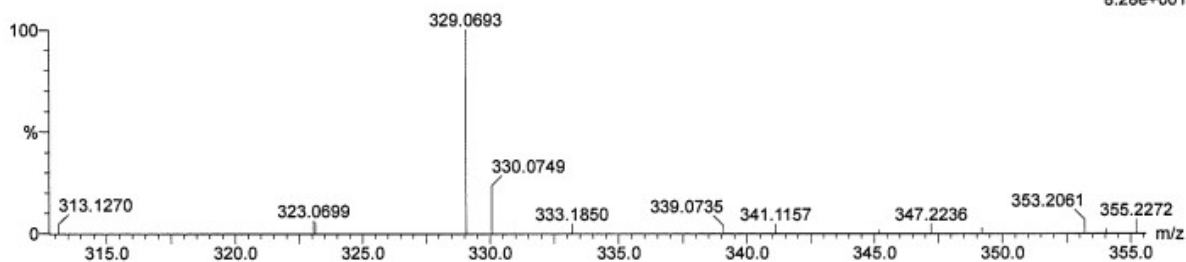

Minimum: -1.5  
Maximum: 5.0 20.0 50.0

| Mass     | Calc. Mass | mDa  | PPM   | DBE  | i-FIT | i-FIT (Norm) | Formula       |
|----------|------------|------|-------|------|-------|--------------|---------------|
| 329.0693 | 329.0695   | -0.2 | -0.6  | 6.5  | 11.7  | 2.5          | C14 H17 O7 S  |
|          | 329.0704   | -1.1 | -3.3  | 5.5  | 14.0  | 4.8          | C15 H21 O2 S3 |
|          | 329.0670   | 2.3  | 7.0   | 10.5 | 13.6  | 4.4          | C18 H17 O2 S2 |
|          | 329.0661   | 3.2  | 9.7   | 11.5 | 9.4   | 0.1          | C17 H13 O7    |
|          | 329.0729   | -3.6 | -10.9 | 1.5  | 13.9  | 4.6          | C11 H21 O7 S2 |
|          | 329.0636   | 5.7  | 17.3  | 15.5 | 13.5  | 4.2          | C21 H13 O2 S  |

Figure S2.72 HRMS data for **13**;  $m/z$  (M-H)<sup>-</sup> calc. mass is 329.0695, 329.0693 was found.

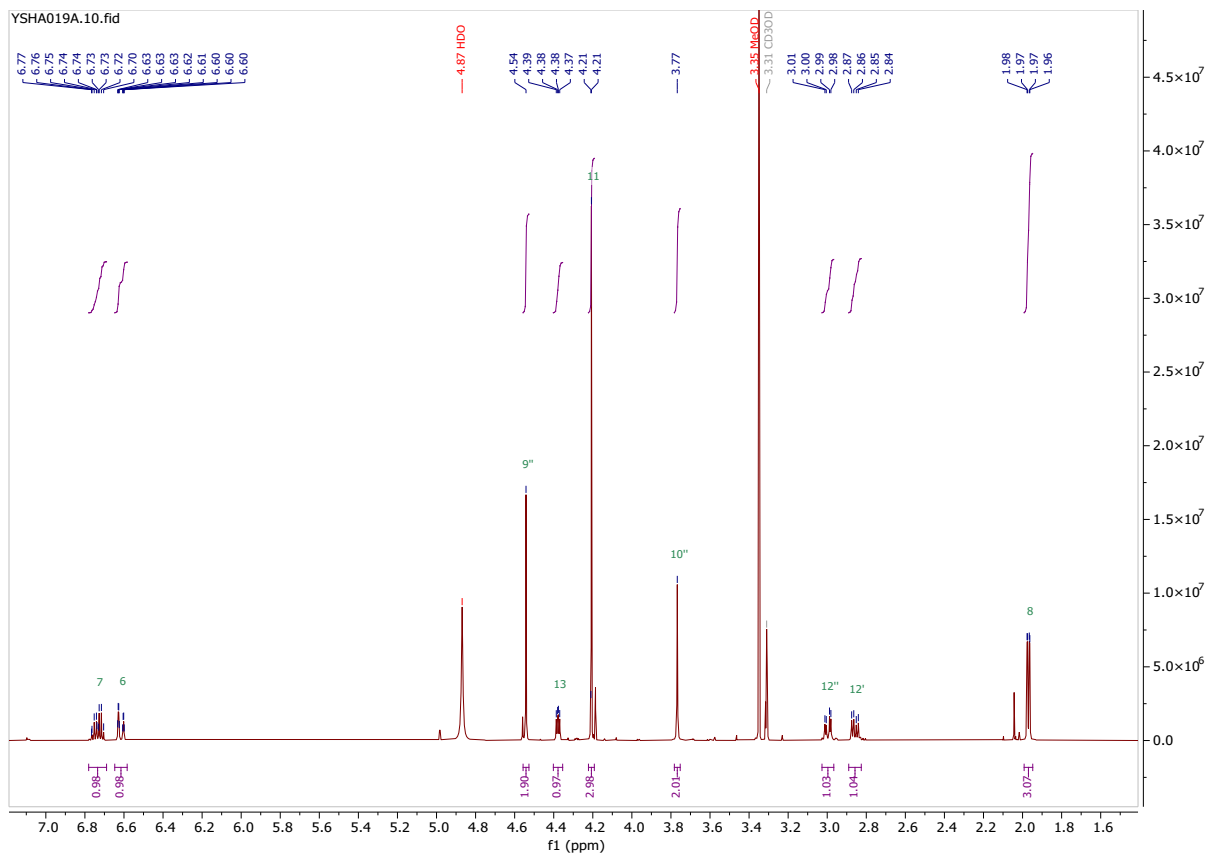

Figure S2.73  $^1\text{H-NMR}$  of **13** recorded at 600 MHz in  $\text{CD}_3\text{OD}$ .

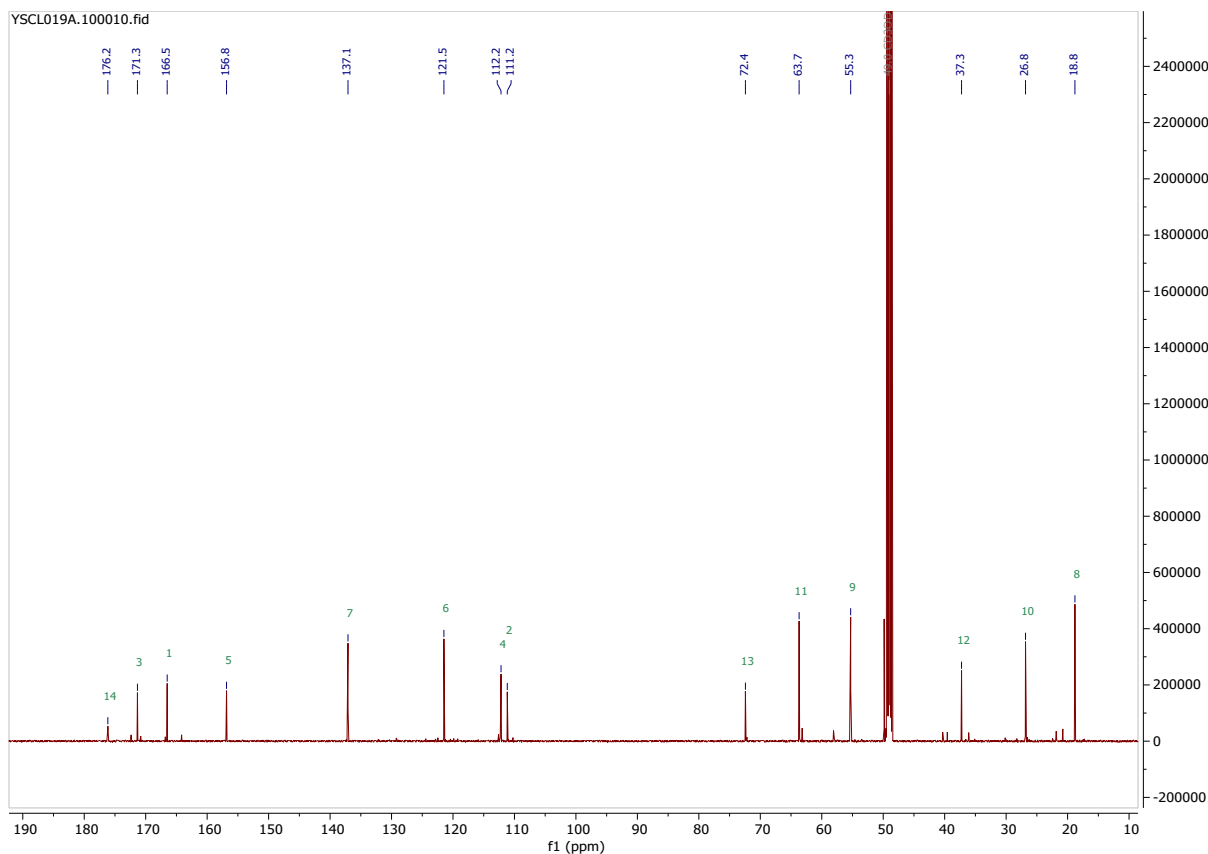

Figure S2.74  $^{13}\text{C-NMR}$  of **13** recorded at 150 MHz in  $\text{CD}_3\text{OD}$ .

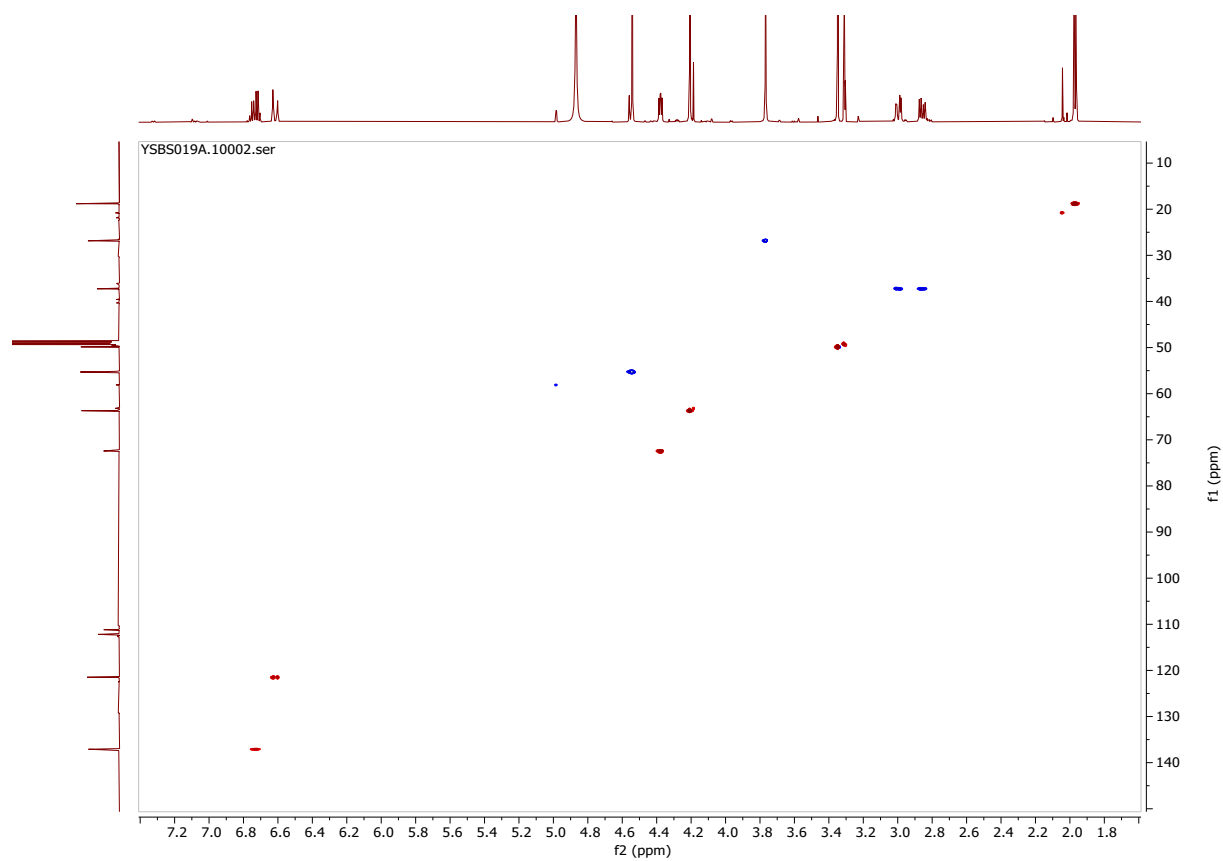

Figure S2.75 HSQC-spectrum of **13** recorded at 600, 150 MHz in CD<sub>3</sub>OD.

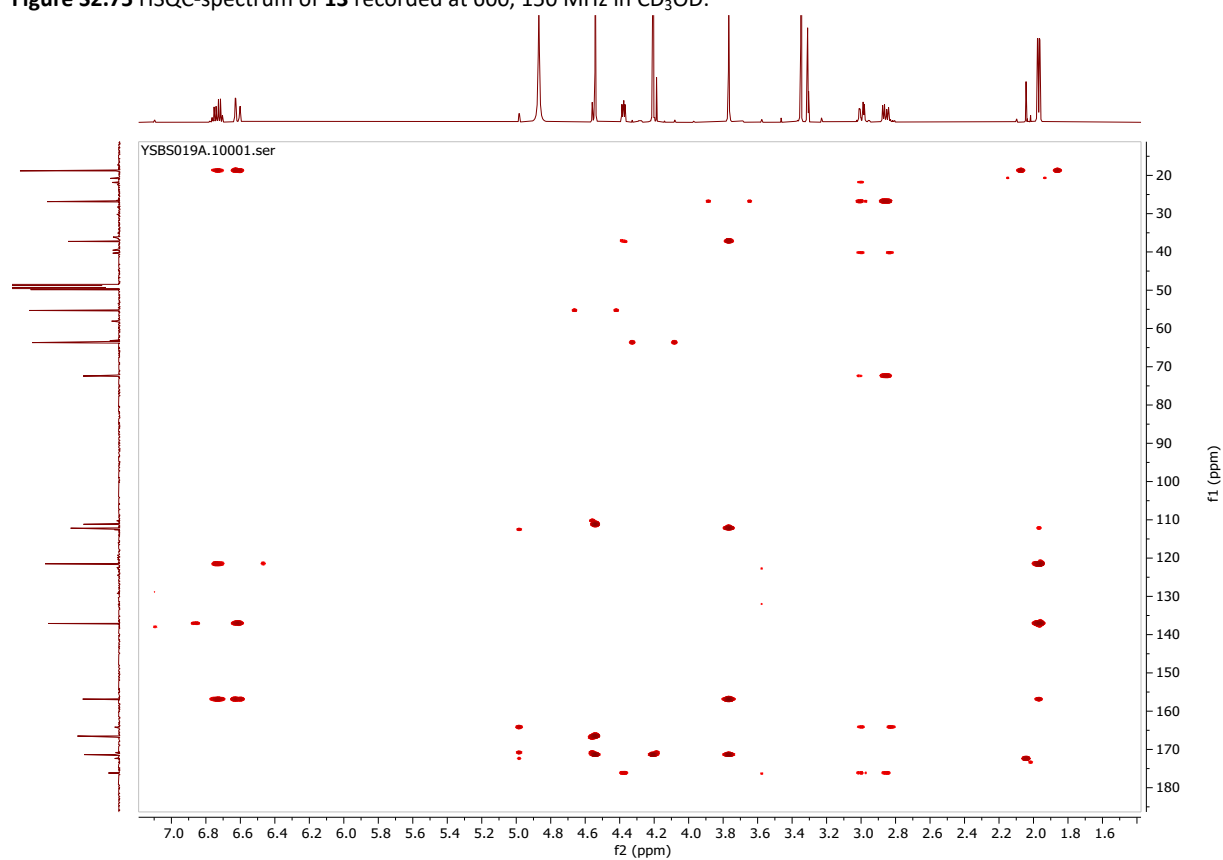

Figure S2.76 HMBC-spectrum of **13** recorded at 600, 150 MHz in CD<sub>3</sub>OD.

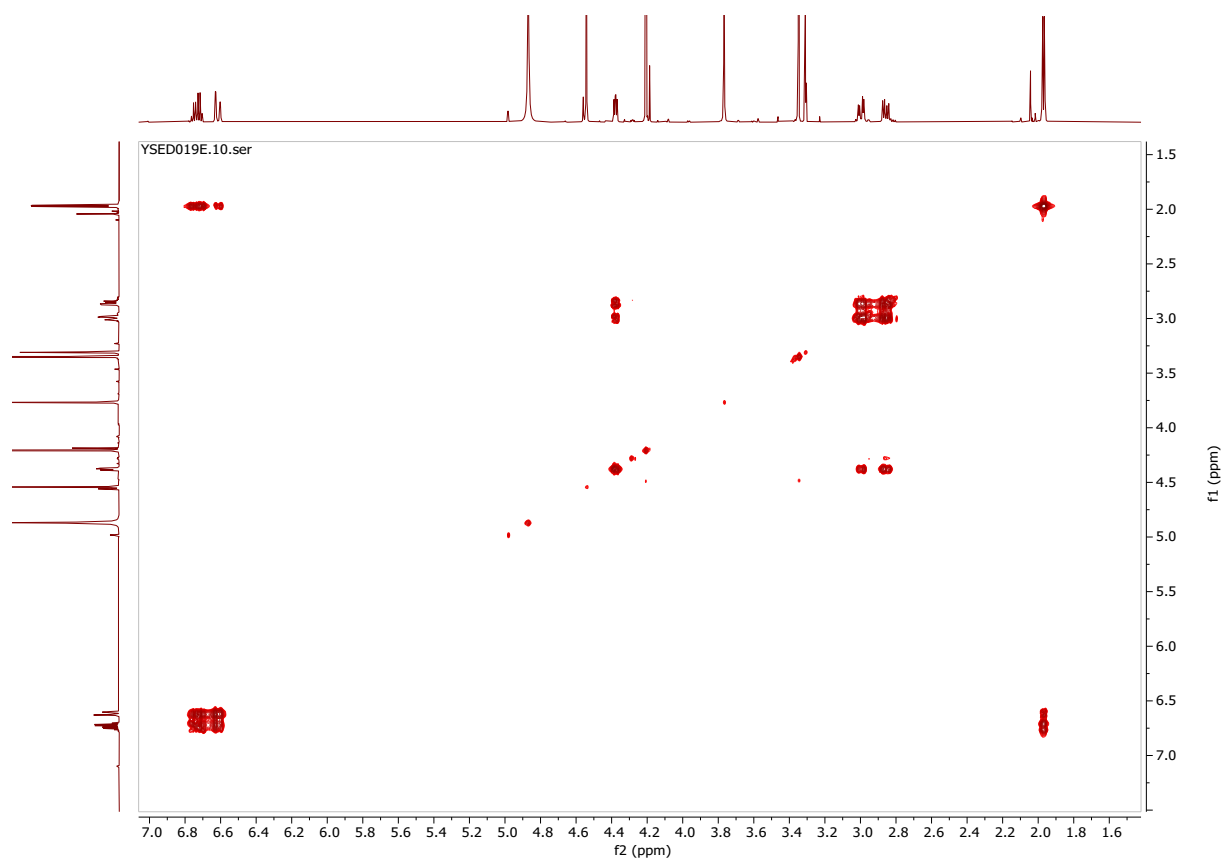

**Figure S2.77**  $^1\text{H}$ ,  $^1\text{H}$ -COSY-spectrum of **13** recorded at 600 MHz in  $\text{CD}_3\text{OD}$ .

## Compound 14

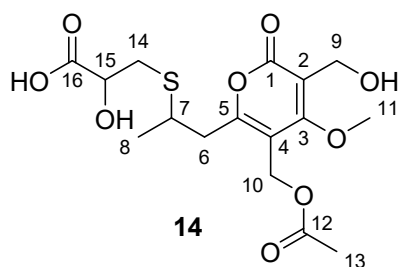

Chemical Formula: C<sub>16</sub>H<sub>22</sub>O<sub>9</sub>S

Exact Mass: 390.0985

| Compound 14 |                  |                                                      |                                     |                        |
|-------------|------------------|------------------------------------------------------|-------------------------------------|------------------------|
| Pos.        | $\delta_C$ / ppm | $\delta_H$ / ppm (J/Hz)                              | <sup>1</sup> H- <sup>1</sup> H COSY | HMBC (H-C)             |
| <b>1</b>    | 166.8            |                                                      |                                     |                        |
| <b>2</b>    | 110.2            |                                                      |                                     |                        |
| <b>3</b>    | 170.8            |                                                      |                                     |                        |
| <b>4</b>    | 112.6            |                                                      |                                     |                        |
| <b>5</b>    | 164.2            |                                                      |                                     |                        |
| <b>6</b>    | 39.6             | 2.83, 1H, dd (14.7, 7.2)<br>3.01, 1H, dd (14.7, 7.7) | 6, 7<br>6, 7                        | 4, 5, 7<br>4, 5, 7     |
| <b>7</b>    | 40.3             | 3.36, 1H, m                                          | 6, 8, 14                            | 5, 6, 14               |
| <b>8</b>    | 21.8             | 1.34, 3H, d (6.8)                                    | 7                                   | 7                      |
| <b>9</b>    | 55.2             | 4.56, 2H, s                                          |                                     | 1, 2, 3                |
| <b>10</b>   | 58.1             | 4.99, 2H, d (1.8)                                    | 13                                  | 3, 4, 5, 12            |
| <b>11</b>   | 63.2             | 4.19, 3H, s                                          |                                     | 3                      |
| <b>12</b>   | 172.4            |                                                      |                                     |                        |
| <b>13</b>   | 20.8             | 2.04, 3H, s                                          |                                     | 10, 12                 |
| <b>14</b>   | 36.1             | 2.85, 1H, m<br>2.97, 1H, m                           | 7, 15<br>7, 15                      | 7, 15, 16<br>7, 15, 16 |
| <b>15</b>   | 72.2             | 4.28, 1H, dd (6.7, 4.0)                              | 14                                  | 14, 16                 |
| <b>16</b>   | 176.2            |                                                      |                                     |                        |

**Table S2.12** Summarized NMR signals for <sup>13</sup>C, <sup>1</sup>H, <sup>1</sup>H-<sup>1</sup>H COSY, HMBC for **14** recorded in CD<sub>3</sub>OD.



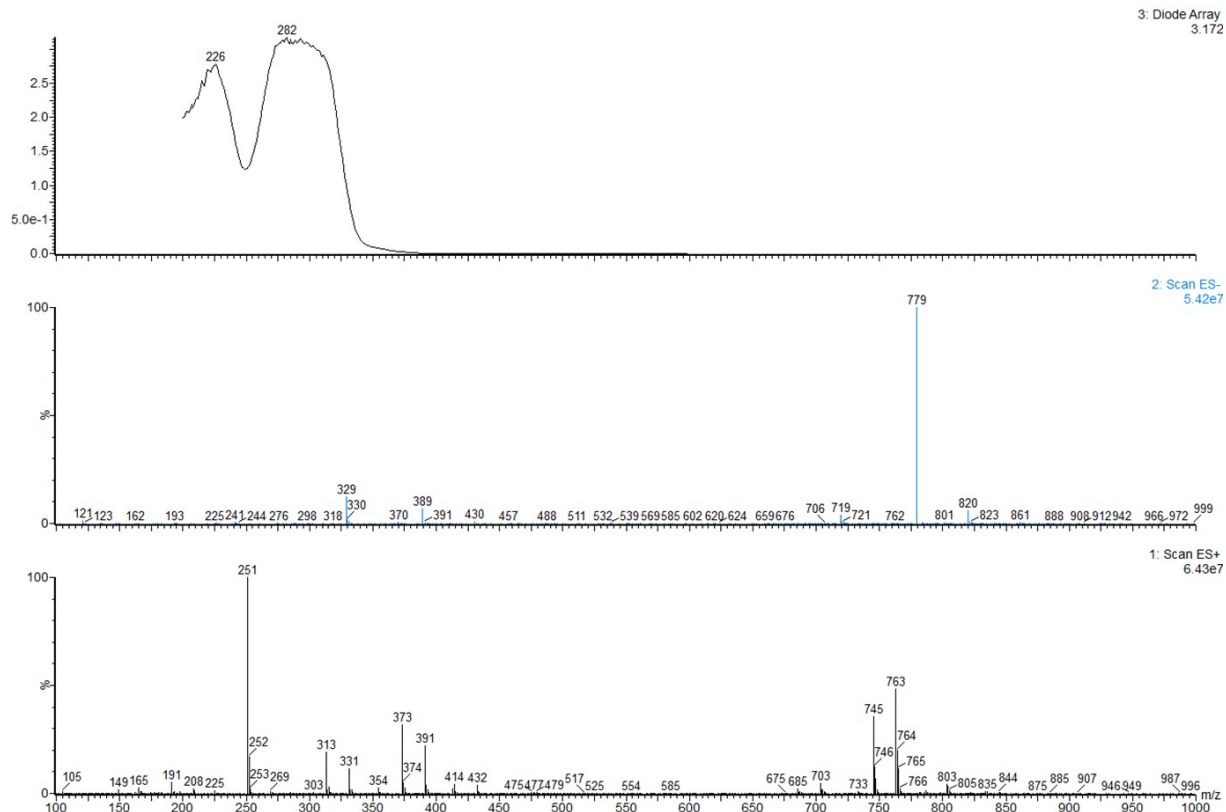

Figure S2.78 UV-absorption (top) and fragmentation pattern of **14** in ES<sup>-</sup> (middle) and ES<sup>+</sup> TIC (bottom) by LR-LCMS.

## Elemental Composition Report

Page 1

### Single Mass Analysis

Tolerance = 20.0 PPM / DBE: min = -1.5, max = 50.0

Element prediction: Off

Number of isotope peaks used for i-FIT = 3

Monoisotopic Mass, Even Electron Ions

130 formula(e) evaluated with 6 results within limits (up to 30 closest results for each mass)

Elements Used:

C: 0-85 H: 0-110 O: 0-9 S: 0-2

Sun

QToF Premier HAB321

YS 020b, neg 416 (4.249) AM (Cen,5, 85.00, Ht,10000.0,554.26,0.70,LS 10)

1: TOF MS ES-  
1.90e+002

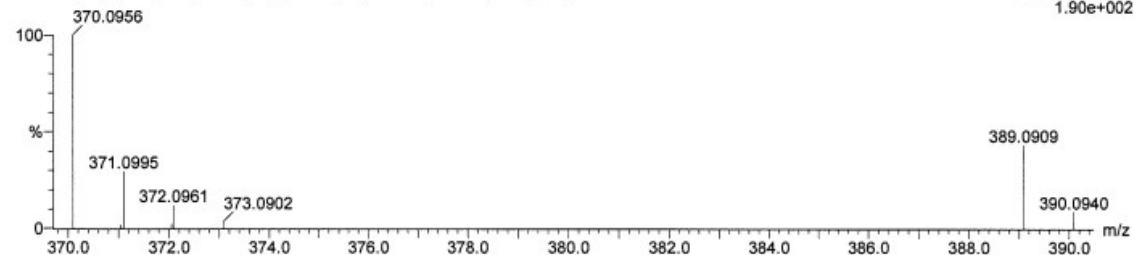

Minimum: -1.5  
Maximum: 5.0 20.0 50.0

| Mass     | Calc. Mass | mDa  | PPM   | DBE  | i-FIT | i-FIT (Norm) | Formula       |
|----------|------------|------|-------|------|-------|--------------|---------------|
| 389.0909 | 389.0906   | 0.3  | 0.8   | 6.5  | 12.0  | 2.4          | C16 H21 O9 S  |
|          | 389.0881   | 2.8  | 7.2   | 10.5 | 13.7  | 4.1          | C20 H21 O4 S2 |
|          | 389.0940   | -3.1 | -8.0  | 1.5  | 13.9  | 4.3          | C13 H25 O9 S2 |
|          | 389.0873   | 3.6  | 9.3   | 11.5 | 9.8   | 0.2          | C19 H17 O9    |
|          | 389.0966   | -5.7 | -14.6 | 24.5 | 12.2  | 2.6          | C30 H13 O     |
|          | 389.0848   | 6.1  | 15.7  | 15.5 | 13.6  | 4.0          | C23 H17 O4 S  |

Figure S2.79 HRMS data for **14**;  $m/z$  (M-H)<sup>+</sup> calc. mass is 389.0906, 389.0909 was found.

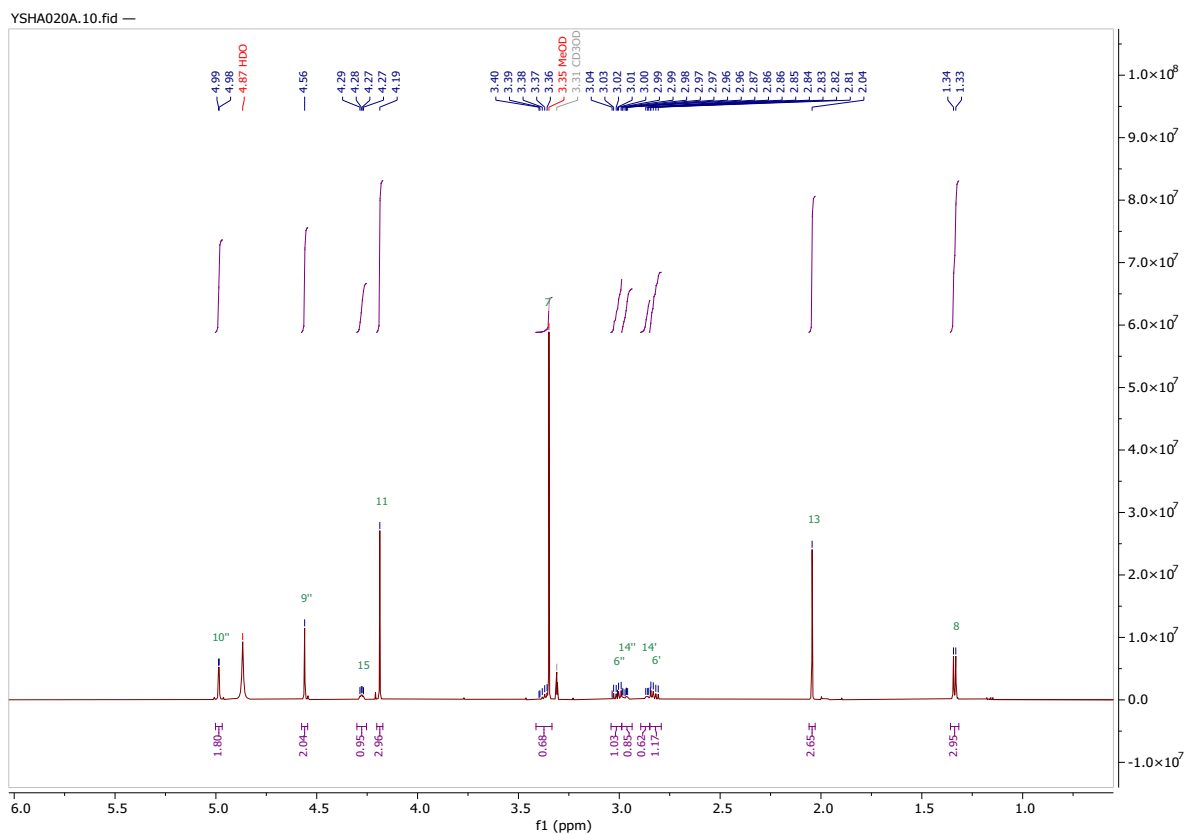

Figure S2.80 <sup>1</sup>H-NMR of **14** recorded at 600 MHz in CD<sub>3</sub>OD.

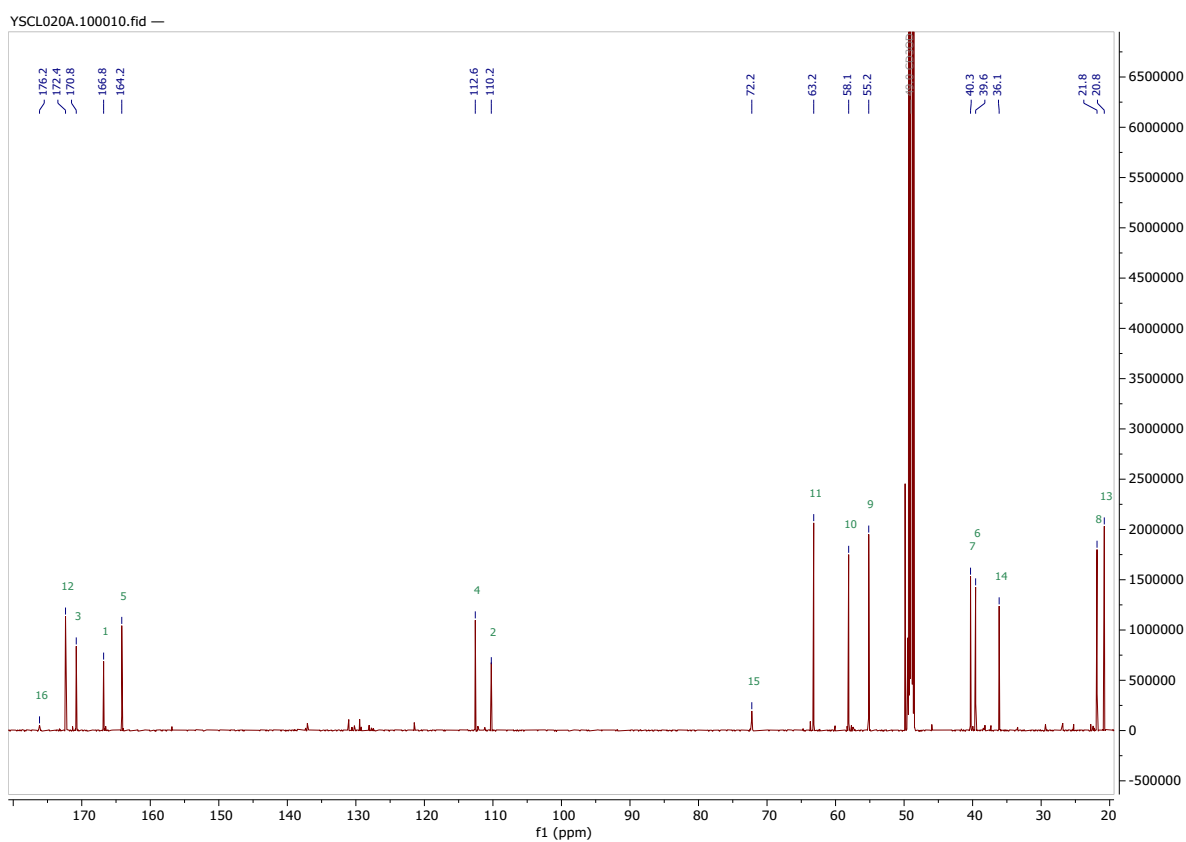

Figure S2.81 <sup>13</sup>C-NMR of **14** recorded at 150 MHz in CD<sub>3</sub>OD.

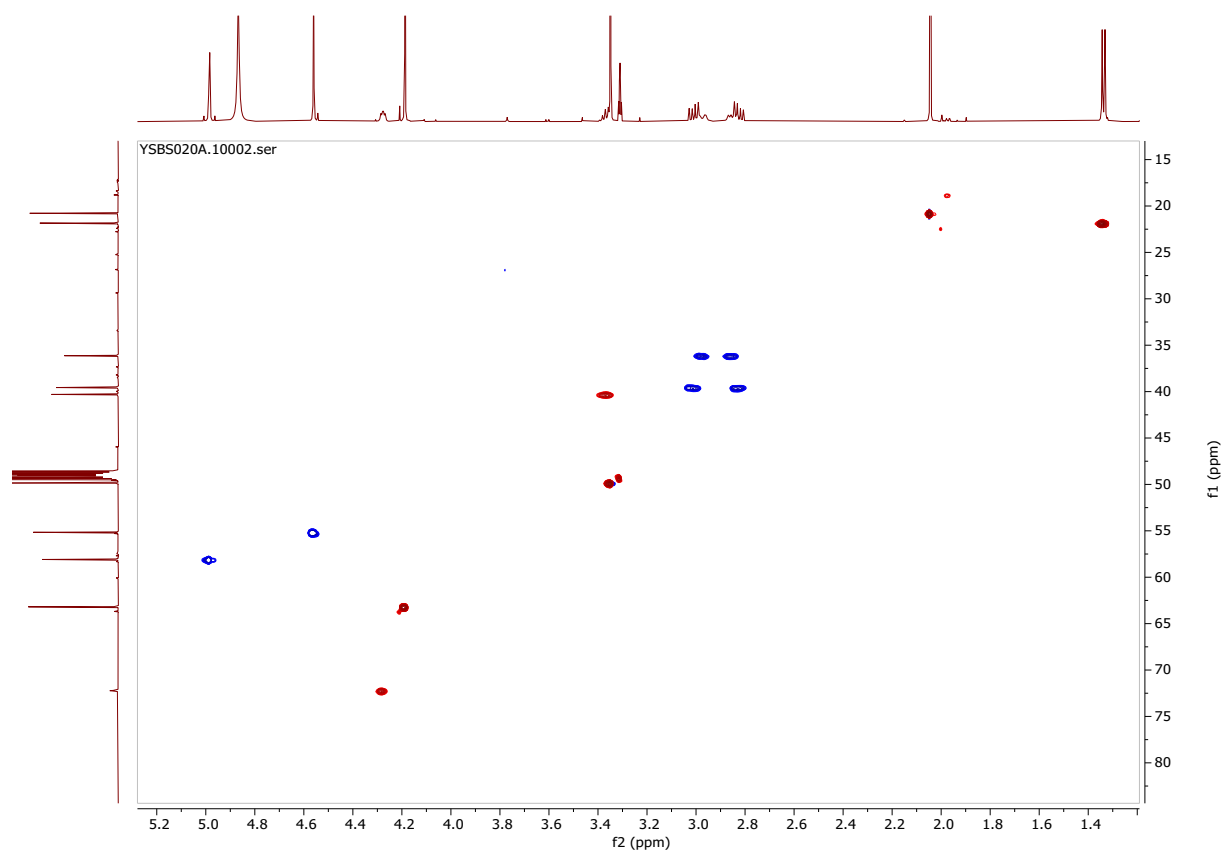

Figure S2.82 HSQC-spectrum of **14** recorded at 600, 150 MHz in CD<sub>3</sub>OD.

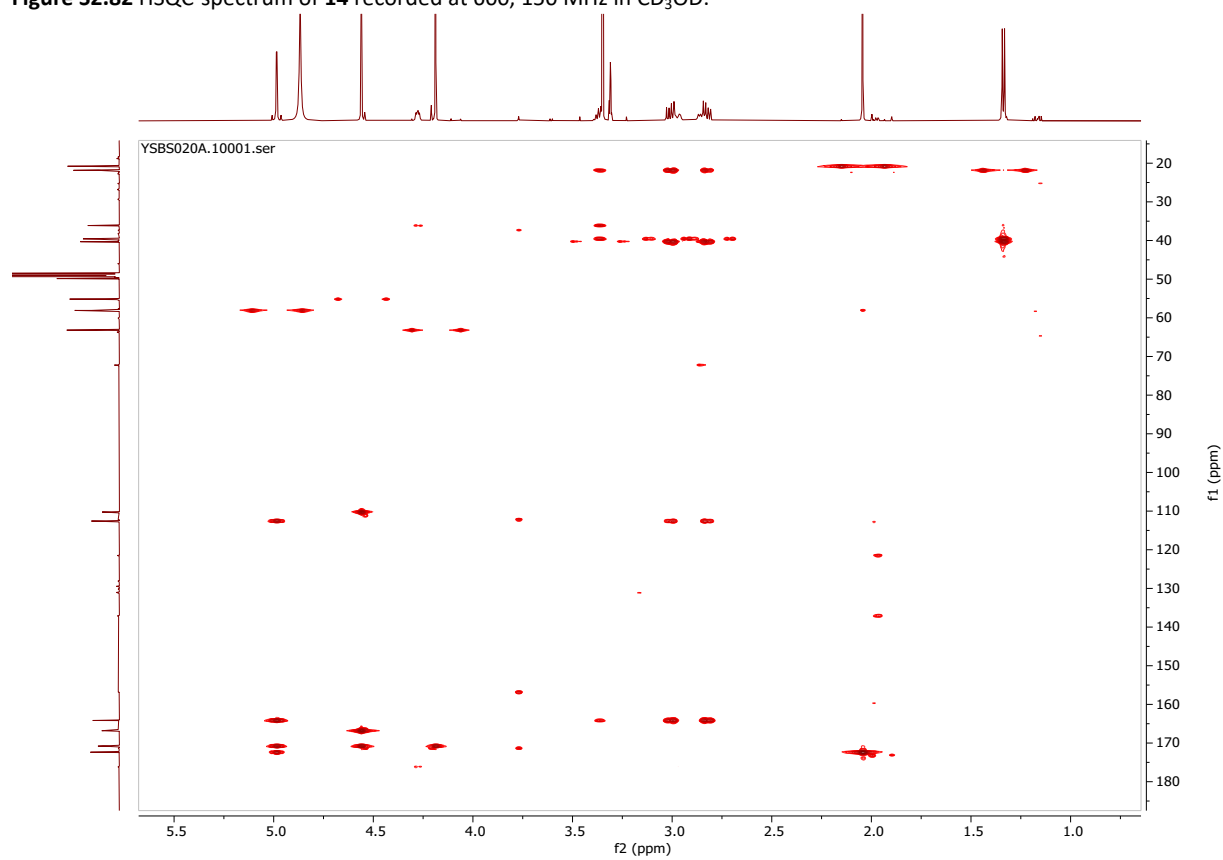

Figure S2.83 HMBC-spectrum of **14** recorded at 600, 150 MHz in CD<sub>3</sub>OD.

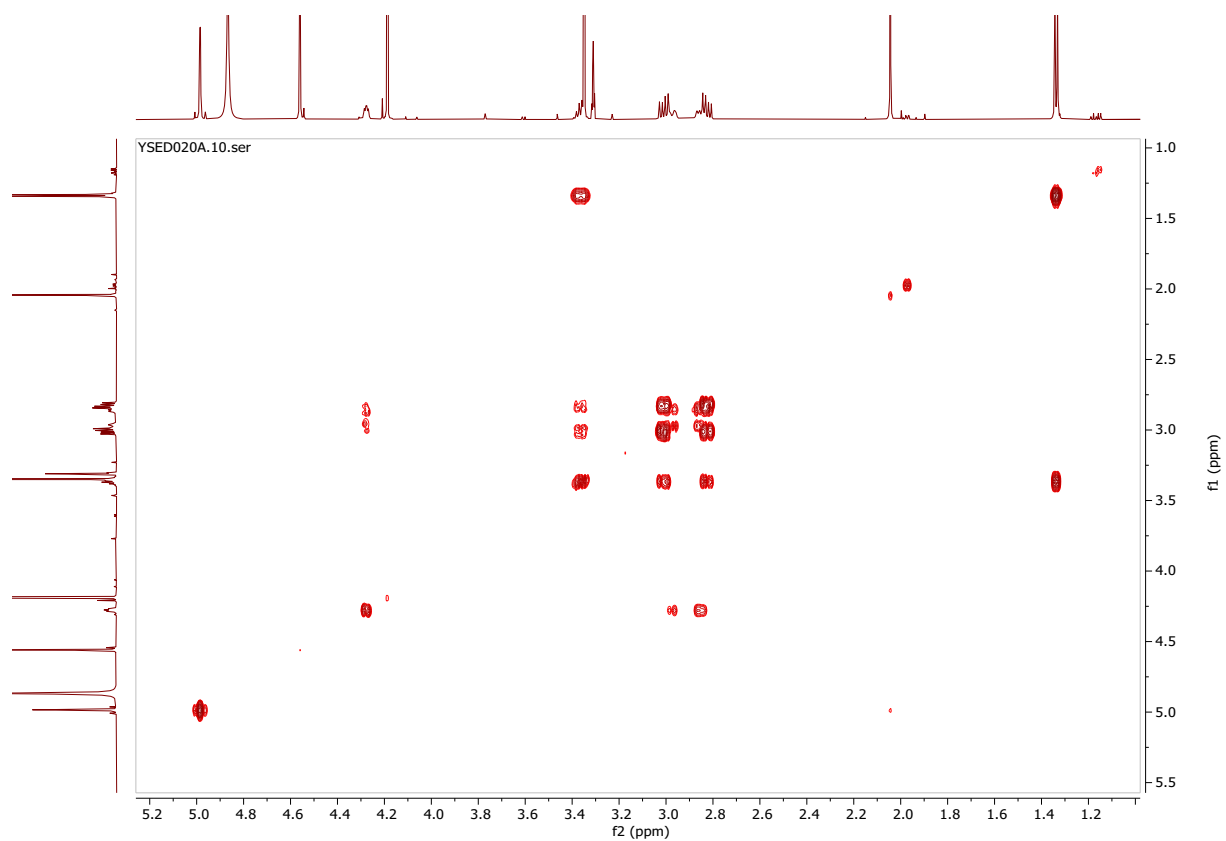

**Figure S2.84**  $^1\text{H}$ ,  $^1\text{H}$ -COSY-spectrum of **14** recorded at 600 MHz in  $\text{CD}_3\text{OD}$ .

## Compound 15

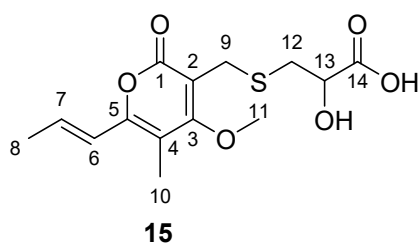

Chemical Formula: C<sub>14</sub>H<sub>18</sub>O<sub>6</sub>S

Exact Mass: 314.0824

| Compound 15 |                  |                                                      |                                     |                        |
|-------------|------------------|------------------------------------------------------|-------------------------------------|------------------------|
| Pos.        | $\delta_C$ / ppm | $\delta_H$ / ppm (J/Hz)                              | <sup>1</sup> H- <sup>1</sup> H COSY | HMBC (H-C)             |
| 1           | 162.7            |                                                      |                                     |                        |
| 2           | 111.6            |                                                      |                                     |                        |
| 3           | 168.5            |                                                      |                                     |                        |
| 4           | 108.7            |                                                      |                                     |                        |
| 5           | 153.1            |                                                      |                                     |                        |
| 6           | 120.5            | 6.5, 1H, m                                           | 7, 8                                | 5, 7, 8                |
| 7           | 133.8            | 6.5, 1H, m                                           | 6, 8                                | 5, 6, 8                |
| 8           | 18.4             | 1.91, 3H, m                                          | 6, 7                                | 6, 7                   |
| 9           | 26.2             | 3.61, 2H, s                                          |                                     | 1, 2, 3, 12            |
| 10          | 9.4              | 1.97, 3H, s                                          |                                     | 3, 4, 5                |
| 11          | 61.2             | 3.87, 3H, s                                          |                                     | 3                      |
| 12          | 36.6             | 2.77, 1H, dd (13.5, 6.8)<br>2.89, 1H, dd (13.5, 4.8) | 12, 13<br>12, 13                    | 9, 13, 14<br>9, 13, 14 |
| 13          | 70.4             | 4.14, 1H, m                                          | 12                                  | 12, 14                 |
| 14          | 174.1            |                                                      |                                     |                        |

**Table S2.13** Summarized NMR signals for <sup>13</sup>C, <sup>1</sup>H, <sup>1</sup>H-<sup>1</sup>H COSY, HMBC for **15** recorded in DMSO-d<sub>6</sub>.

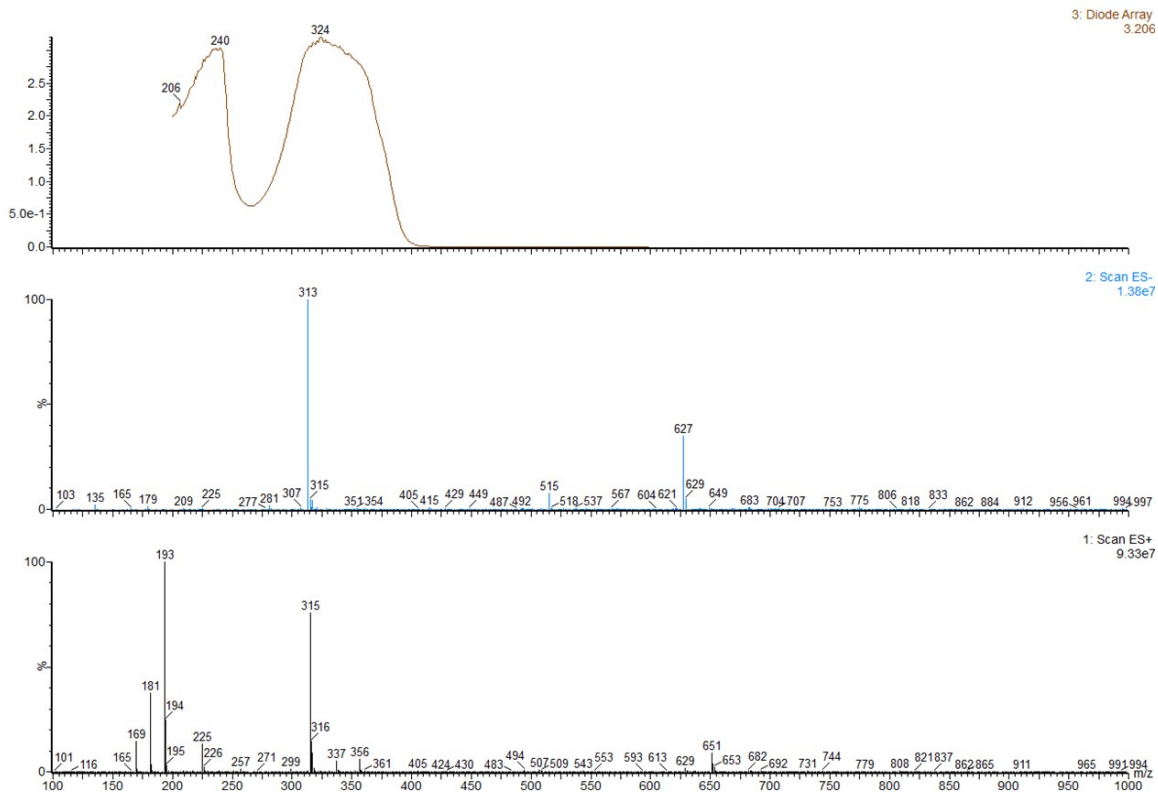

Figure S2.85 UV-absorption (top) and fragmentation pattern of **15** in ES<sup>-</sup> (middle) and ES<sup>+</sup> TIC (bottom) by LR-LCMS..

### Elemental Composition Report

Page 1

#### Single Mass Analysis

Tolerance = 20.0 PPM / DBE: min = -1.5, max = 50.0

Element prediction: Off

Number of isotope peaks used for i-FIT = 3

Monoisotopic Mass, Even Electron Ions

103 formula(e) evaluated with 5 results within limits (up to 30 closest results for each mass)

Elements Used:

C: 0-85 H: 0-110 O: 0-9 S: 0-2

Sun

QToF Premier HAB321

YS 030b, neg 580 (5.930) AM (Cen,5, 85.00, Ht,10000.0,554.26,0.70,LS 10)

1: TOF MS ES-  
1.63e+002

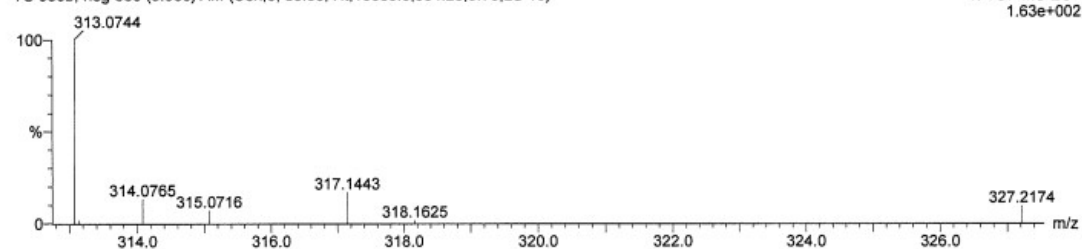

Minimum: -1.5  
Maximum: 5.0 20.0 50.0

| Mass     | Calc. Mass | mDa  | PPM   | DBE  | i-FIT | i-FIT (Norm) | Formula       |
|----------|------------|------|-------|------|-------|--------------|---------------|
| 313.0744 | 313.0746   | -0.2 | -0.6  | 6.5  | 7.6   | 0.3          | C14 H17 O6 S  |
|          | 313.0721   | 2.3  | 7.3   | 10.5 | 9.9   | 2.6          | C18 H17 O S2  |
|          | 313.0712   | 3.2  | 10.2  | 11.5 | 10.8  | 3.5          | C17 H13 O6    |
|          | 313.0780   | -3.6 | -11.5 | 1.5  | 9.3   | 2.0          | C11 H21 O6 S2 |
|          | 313.0687   | 5.7  | 18.2  | 15.5 | 12.1  | 4.8          | C21 H13 O S   |

Figure S2.86 HRMS data for **15**;  $m/z$  (M-H)<sup>-</sup> calc. mass is 313.0746, 313.0744 was found.

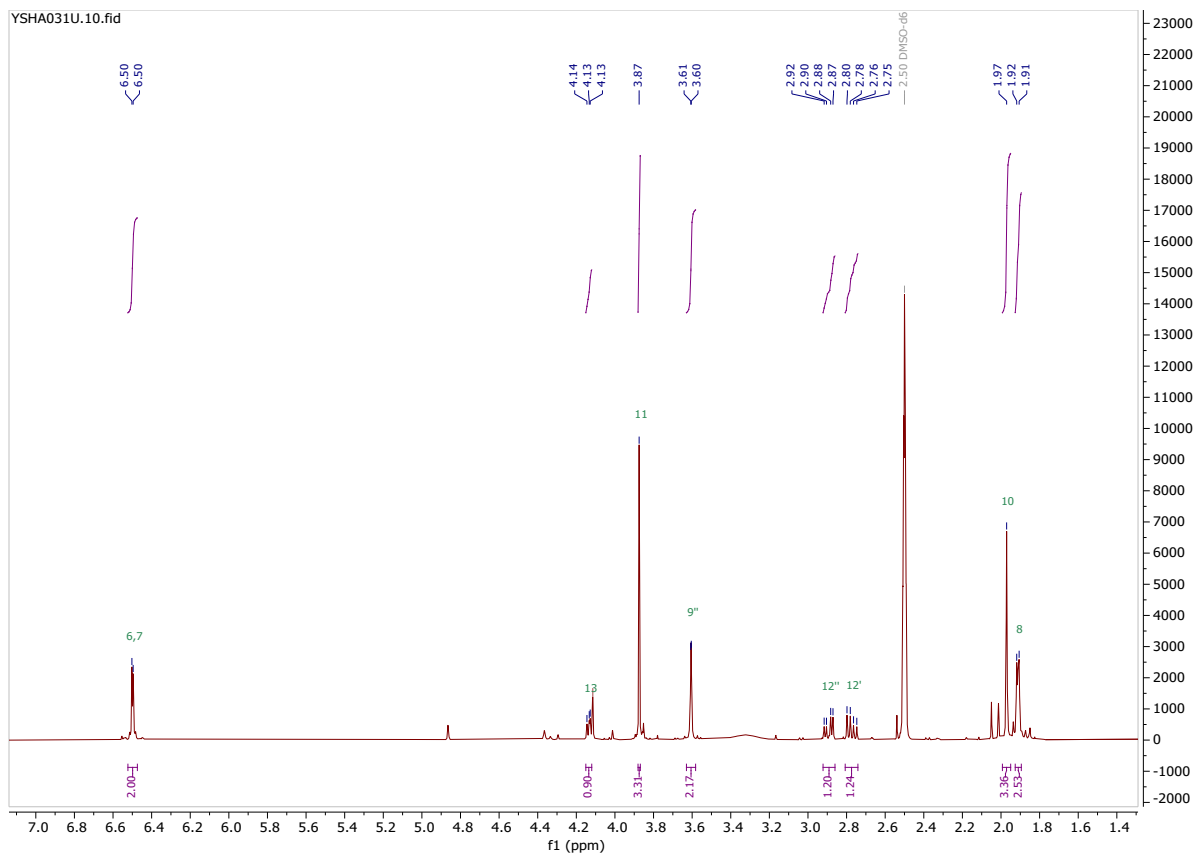

Figure S2.87  $^1\text{H}$ -NMR of **15** recorded at 400 MHz in  $\text{DMSO-d}_6$ .

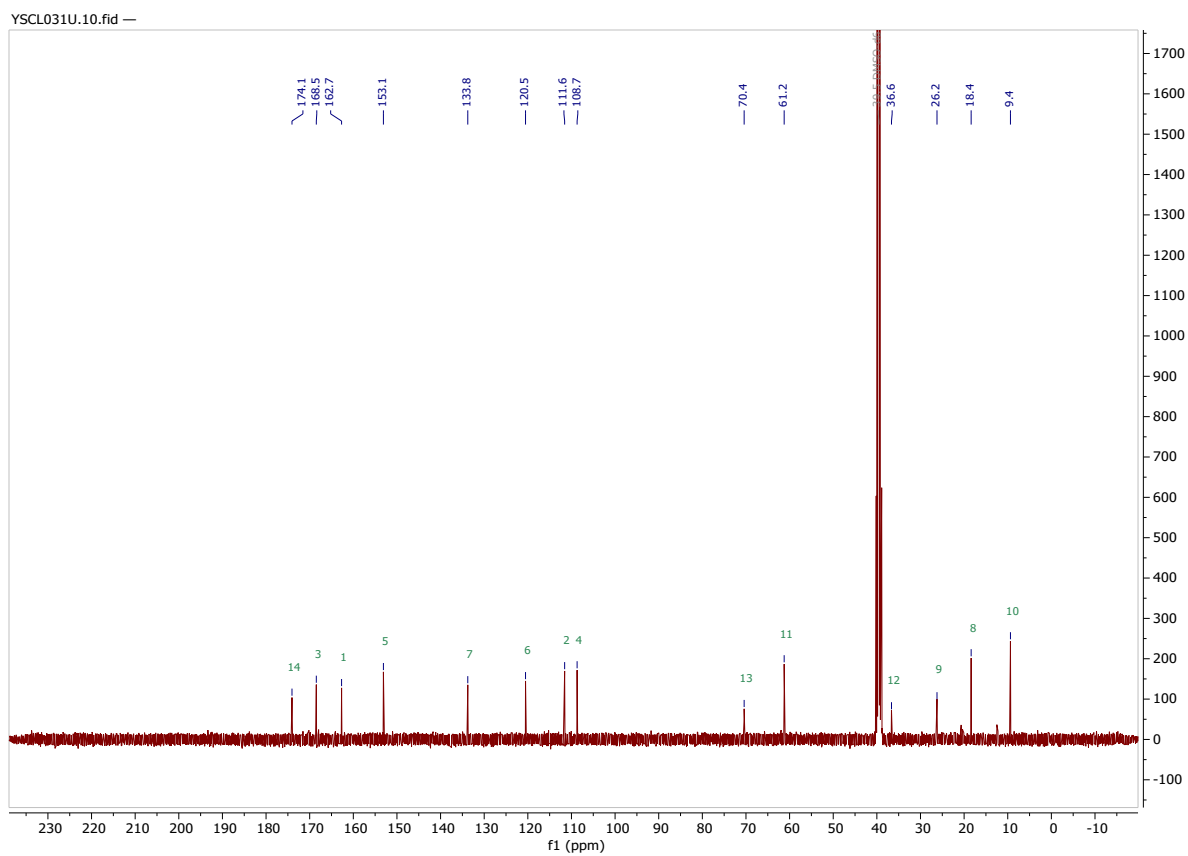

Figure S2.88  $^{13}\text{C}$ -NMR of **15** recorded at 100 MHz in  $\text{DMSO-d}_6$ .

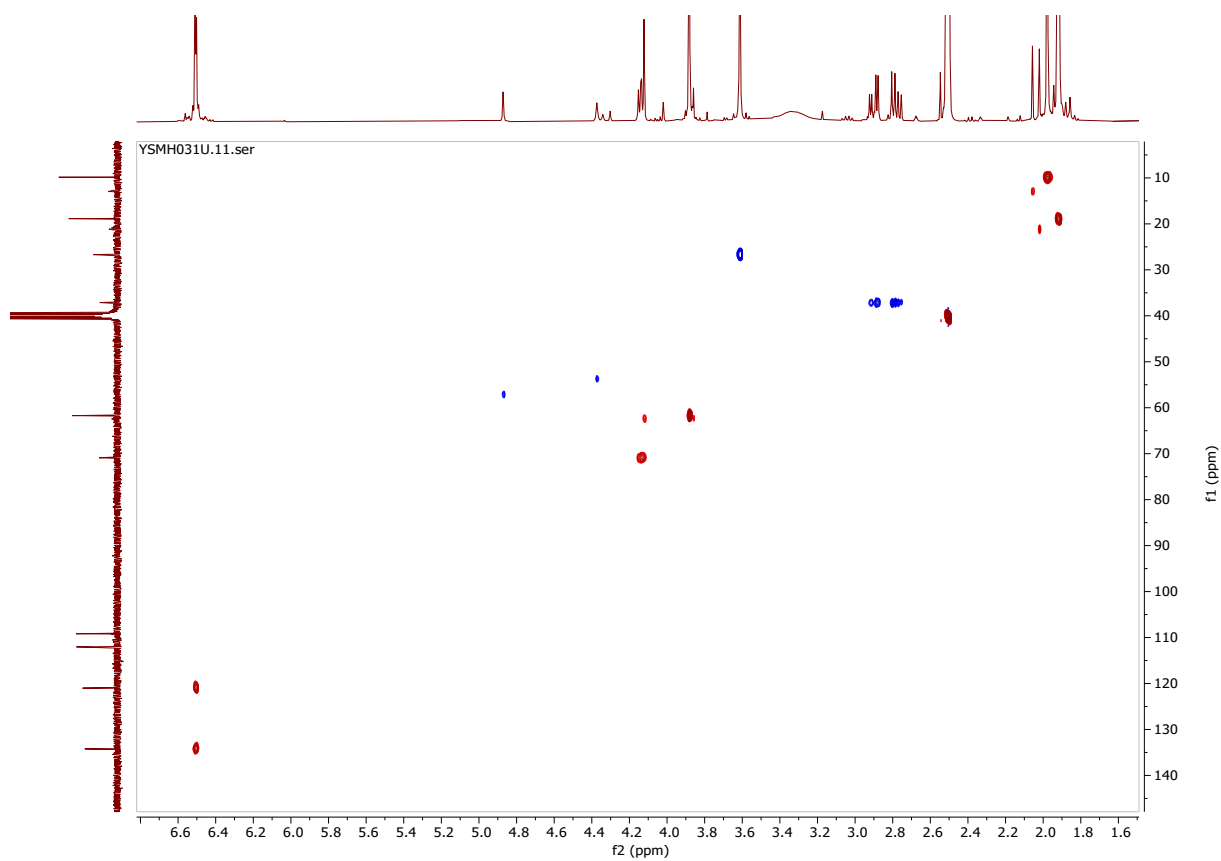

Figure S2.89 HSQC-spectrum of **15** recorded at 400, 100 MHz in DMSO-d<sub>6</sub>.

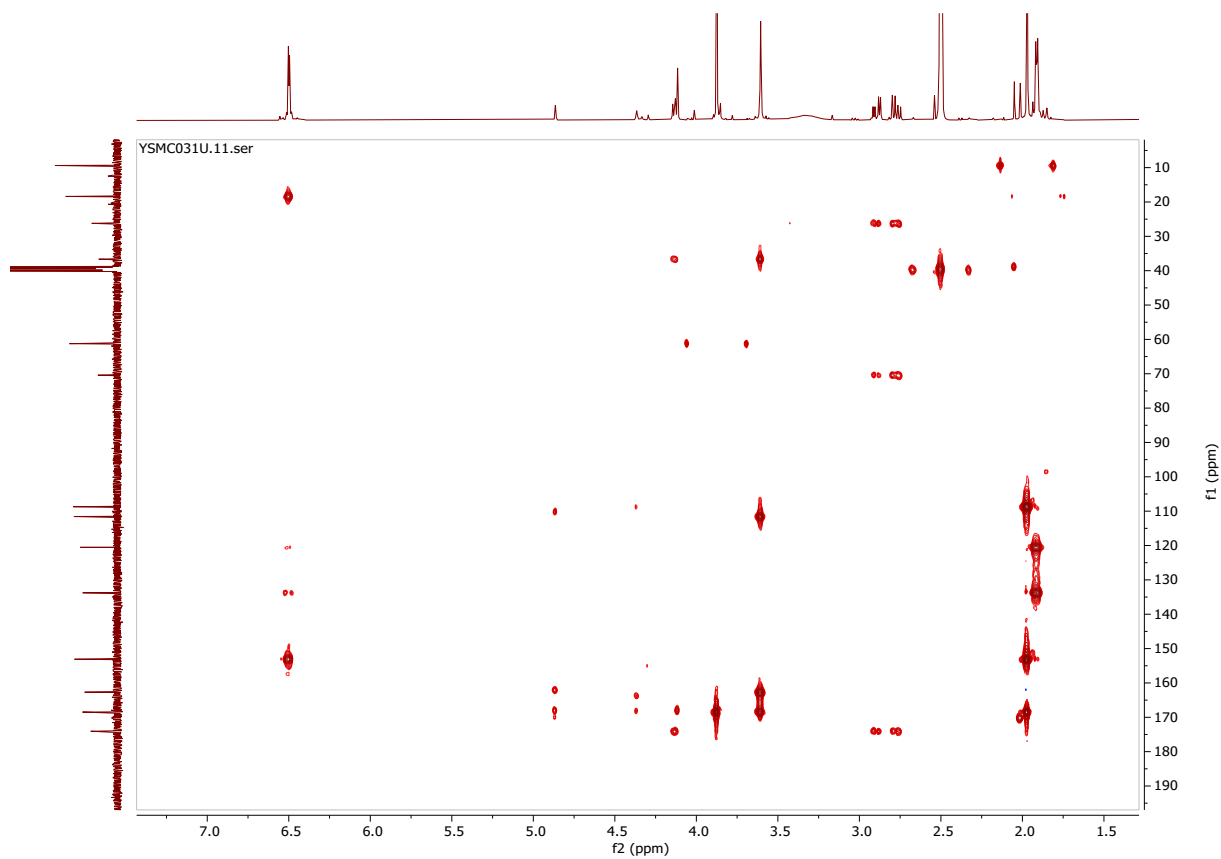

Figure S2.90 HMBC-spectrum of **15** recorded at 400, 100 MHz in DMSO-d<sub>6</sub>.



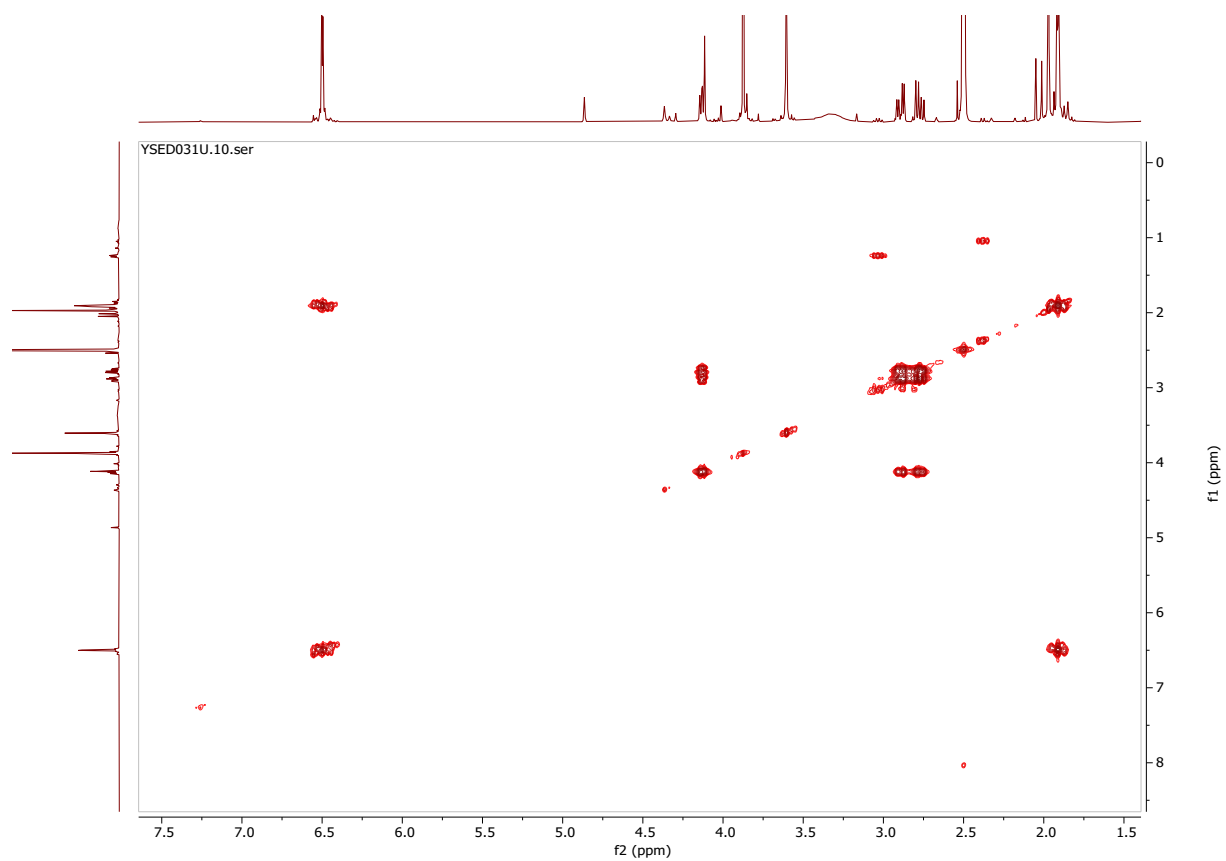

**Figure S2.91**  $^1\text{H}$ ,  $^1\text{H}$ -COSY-spectrum of **15** recorded at 400 MHz in  $\text{DMSO-d}_6$ .

## Compound 16

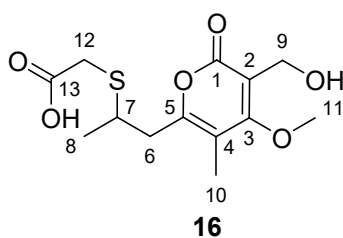

Chemical Formula: C<sub>13</sub>H<sub>18</sub>O<sub>6</sub>S

Exact Mass: 302.0824

| Compound 16 |                  |                                                      |                                     |                          |
|-------------|------------------|------------------------------------------------------|-------------------------------------|--------------------------|
| Pos.        | $\delta_C$ / ppm | $\delta_H$ / ppm (J/Hz)                              | <sup>1</sup> H- <sup>1</sup> H COSY | HMBC (H-C)               |
| <b>1</b>    | 164.1            |                                                      |                                     |                          |
| <b>2</b>    | 109.4            |                                                      |                                     |                          |
| <b>3</b>    | 168.8            |                                                      |                                     |                          |
| <b>4</b>    | 110.3            |                                                      |                                     |                          |
| <b>5</b>    | 157.1            |                                                      |                                     |                          |
| <b>6</b>    | 37.4             | 2.68, 1H, dd (14.5, 7.9)<br>2.84, 1H, dd (14.5, 6.9) | 6, 7<br>6, 7                        | 4, 5, 7, 8<br>4, 5, 7, 8 |
| <b>7</b>    | 38.3             | 3.24, 1H, ddd (7.9, 6.9, 6.9)                        | 6, 8                                | 5, 6, 8, 12              |
| <b>8</b>    | 20.5             | 1.24, 3H, d (6.8)                                    | 7, 8                                | 6, 7                     |
| <b>9</b>    | 53.3             | 4.34, 2H, s                                          |                                     | 1, 2, 3                  |
| <b>10</b>   | 10.2             | 1.89, 3H, s                                          |                                     | 3, 4, 5                  |
| <b>11</b>   | 61.2             | 4.04, 3H, s                                          |                                     | 3                        |
| <b>12</b>   | 32.2             | 3.31, 2H, s                                          |                                     | 7, 13                    |
| <b>13</b>   | 171.6            |                                                      |                                     |                          |

**Table S2.14** Summarized NMR signals for <sup>13</sup>C, <sup>1</sup>H, <sup>1</sup>H-<sup>1</sup>H COSY, HMBC for **16** recorded in DMSO-d<sub>6</sub>.

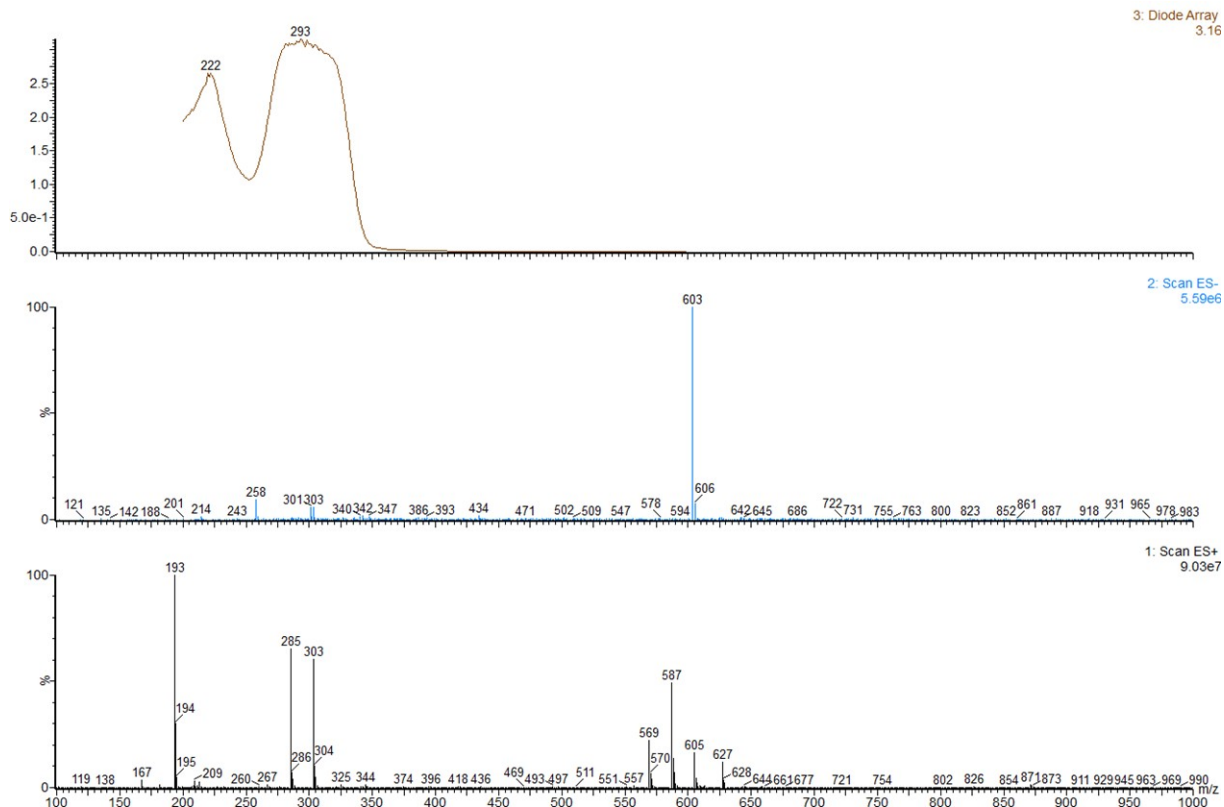

Figure S2.92 UV-absorption (top) and fragmentation pattern of 16 in ES<sup>-</sup> (middle) and ES<sup>+</sup> TIC (bottom) by LR-LCMS.

## Elemental Composition Report

Page 1

### Single Mass Analysis (displaying only valid results)

Tolerance = 5.0 PPM / DBE: min = -1.5, max = 50.0

Selected filters: None

#### Monoisotopic Mass, Even Electron Ions

218 formula(e) evaluated with 2 results within limits (up to 40 closest results for each mass)

Elements Used:

C: 0-72 H: 0-50 N: 0-1 O: 0-6 Na: 0-1 S: 0-1

Sun LCT Premier KD070

YS 025, pos 13 (0.299) AM (Cen,4, 90.00, Ar,10000.0,556.28,0.70,LS 10)

1: TOF MS ES+  
640

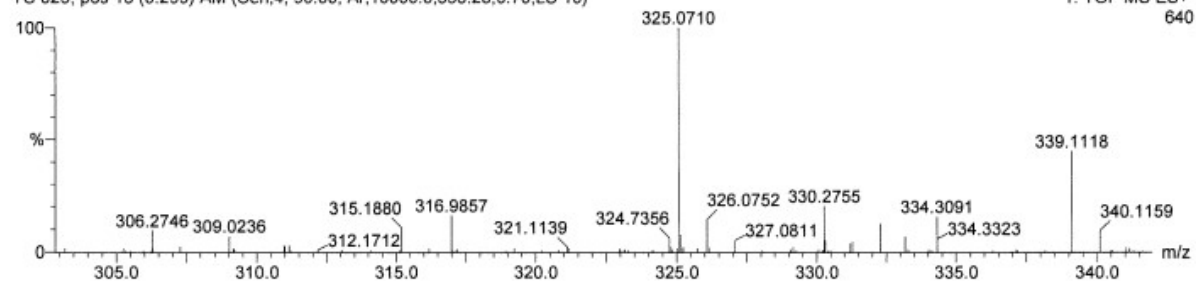

Minimum:

Maximum: 5.0 5.0 -1.5

Mass Calc. Mass mDa PPM DBE i-FIT Formula

|          |          |      |      |      |     |                 |
|----------|----------|------|------|------|-----|-----------------|
| 325.0710 | 325.0712 | -0.2 | -0.6 | 12.5 | 9.5 | C18 H13 O6      |
|          | 325.0722 | -1.2 | -3.7 | 4.5  | 2.5 | C13 H18 O6 Na S |

Figure S2.93 HRMS data for 16;  $m/z$  (M + Na) calc. mass is 325.0712, 325.0710 was found.

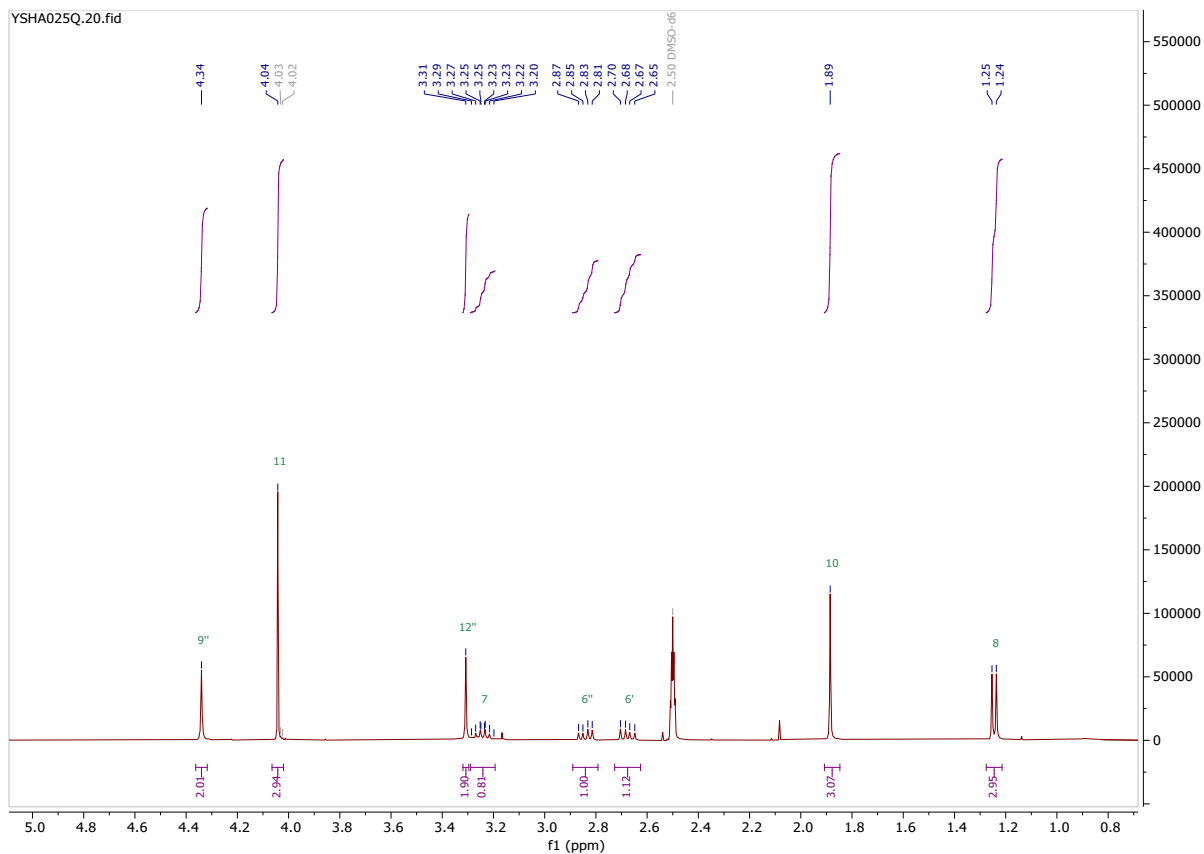

Figure S2.94  $^1\text{H}$ -NMR of **16** recorded at 400 MHz in  $\text{DMSO-d}_6$ .

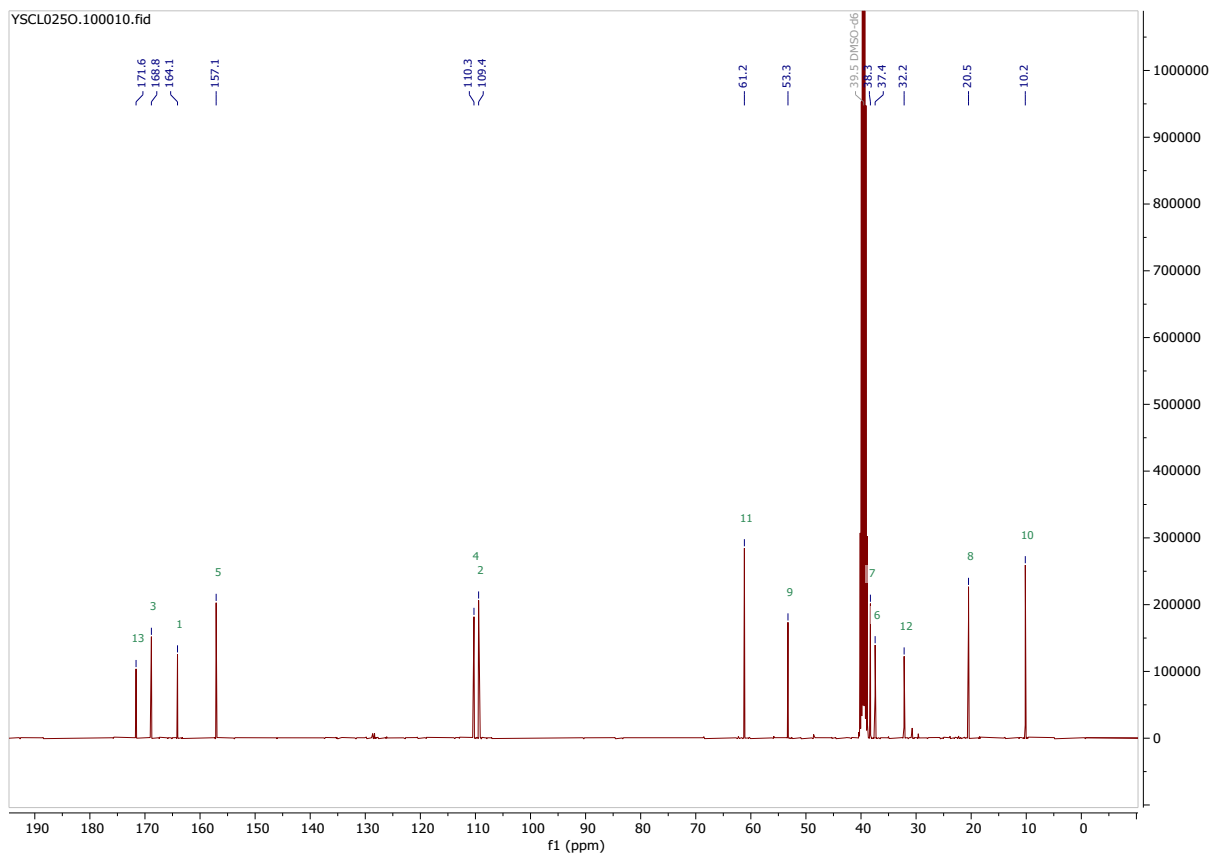

Figure S2.95  $^{13}\text{C}$ -NMR of **16** recorded at 100 MHz in  $\text{DMSO-d}_6$ .

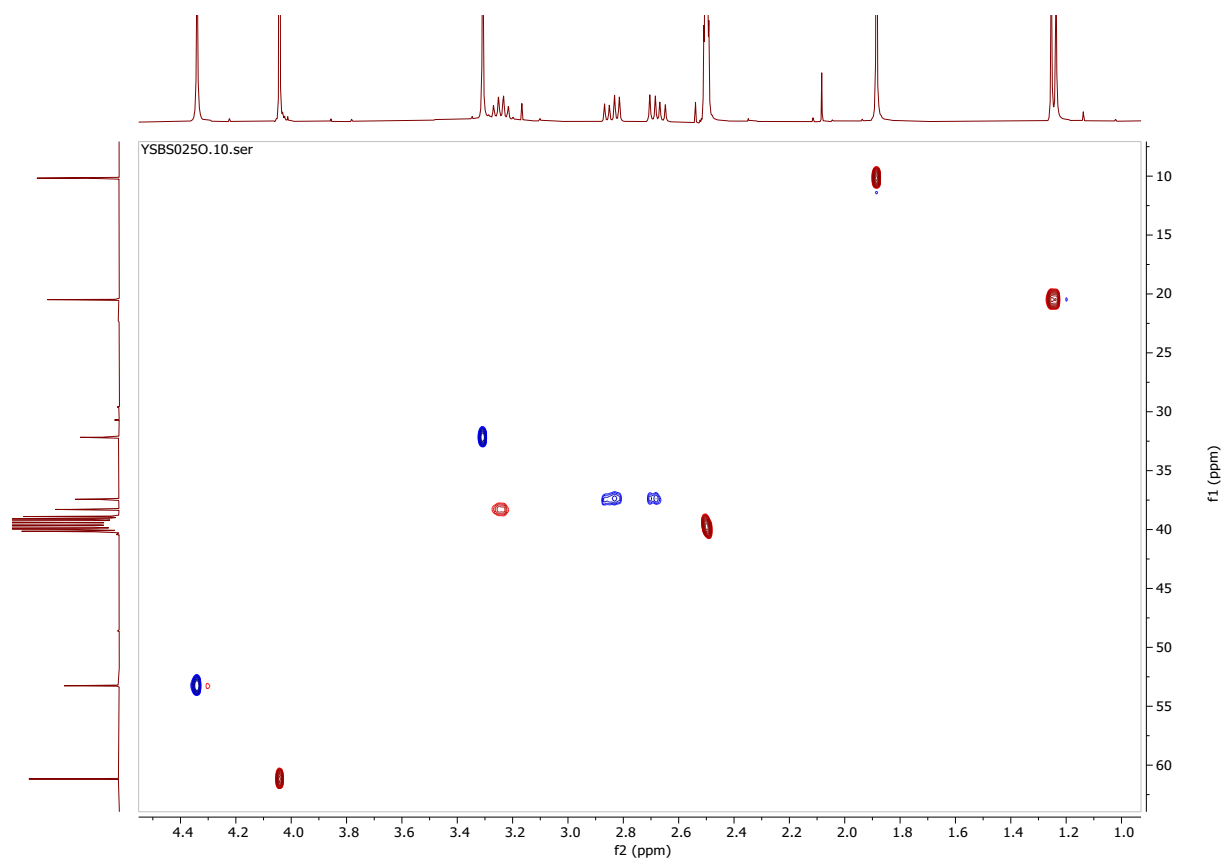

Figure S2.96 HSQC-spectrum of **16** recorded at 400, 100 MHz in DMSO-d.

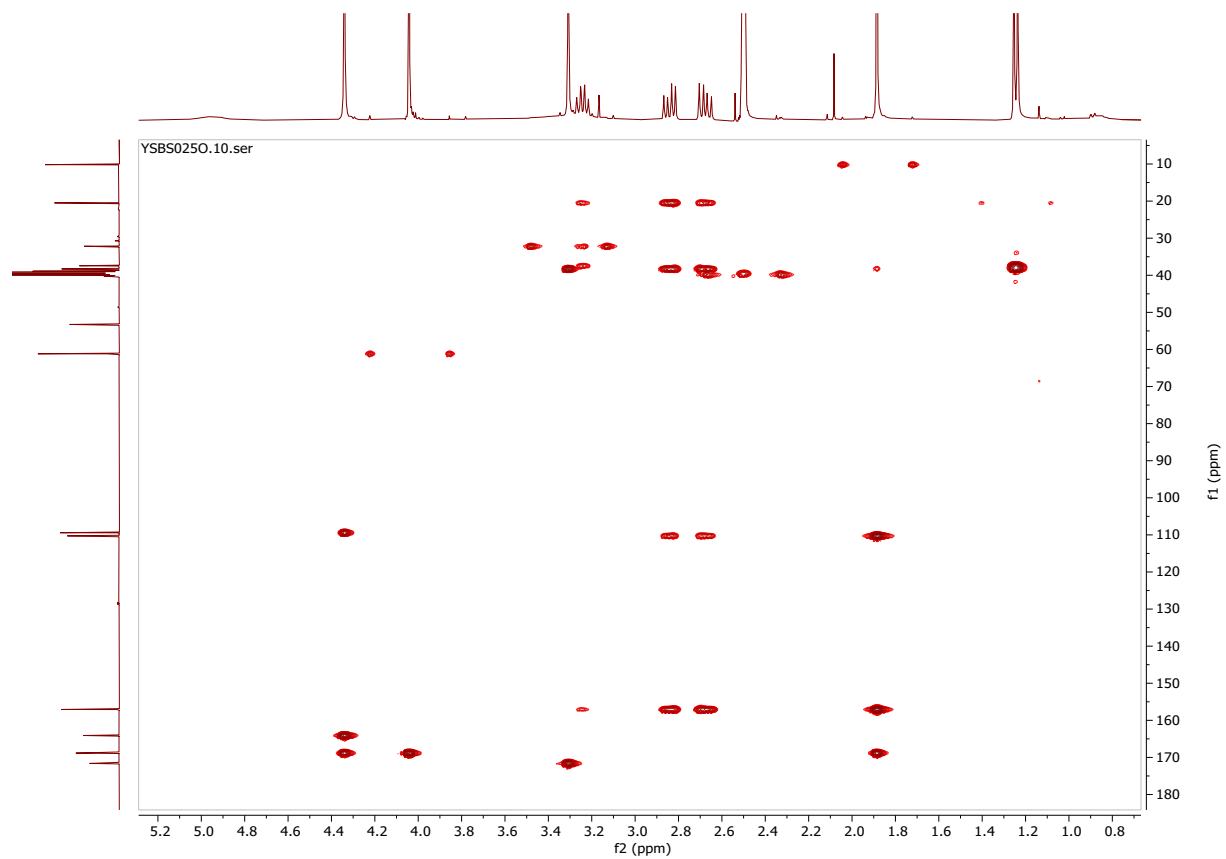

Figure S2.97 HMBC-spectrum of **16** recorded at 400, 100 MHz in DMSO-d<sub>6</sub>.

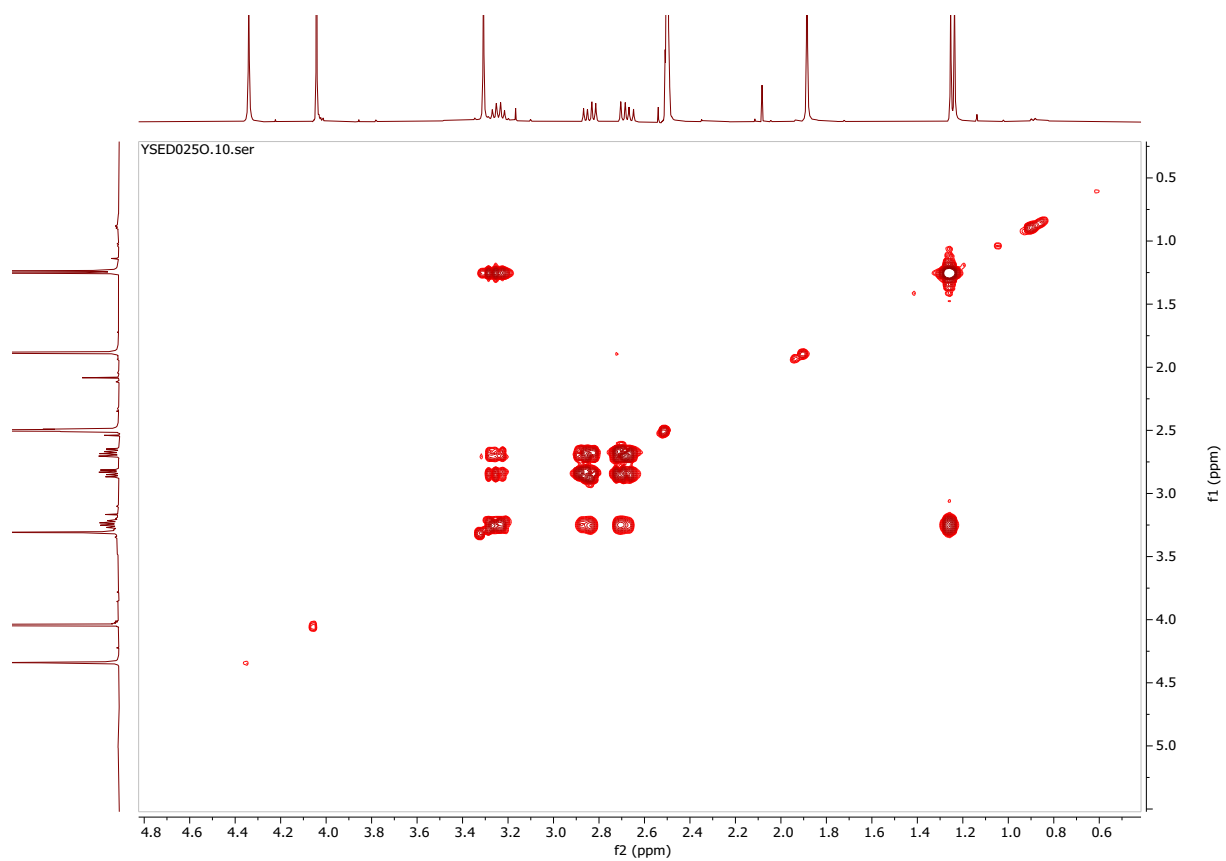

**Figure S2.98**  $^1\text{H}$ ,  $^1\text{H}$ -COSY-spectrum of **16** recorded at 400 MHz in  $\text{DMSO-d}_6$ .

### 3. Reference

1. K. Blin, S. Shaw, A. M. Kloosterman, Z. Charlop-Powers, G. P. Van Wezel, M. H. Medema and T. Weber, *Nuc. Acids Res.*, **2021**, 49(W1): W29–W35.
2. V. Solovyev, P. Kosarev, I. Seledsov and D. Vorobyev, *Genome Biol.*, **2006**, 7, S10.  
doi.org/10.1186/gb-2006-7-s1-s10
3. K. Kasahara, T. Miyamoto, T. Fujimoto, H. Oguri, T. Tokiwano, H. Oikawa, Y. Ebizuka and I. Fujii, *ChemBioChem*, **2010**, 11, 1245–1252.
4. Y. Fujimoto, H. Tsunoda, J. Uzawa and T. Tatsuno, *Chem. Commun.*, **1982**, 83-84.
5. C. L. M. Gilchrist and Y. H. Chooi, *Bioinformatics*, **2021**, 37, 2473–2475.
6. L. Hang, M.-C. Tang, C. J. B. Harvey, C. G. Page, J. Li, Y.-S. Hung, N. Liu, M. E. Hillenmeyer and Y. Tang, *Angew. Chem. Int. Ed.*, **2017**, 129, 9684–9688.
7. T. Schafhauser, D. Wibberg, C. Rückert and A. Winkler, *J. Biotechnol.*, **2015**, 101-102.
8. W. Cheng, M. Chen, M. Ohashi and Y. Tang, *Angew. Chem. Int. Ed.*, **2022**, e202116928.
9. F-J. Jin, J. Maruyama, P. R. Juvvadi, M. Arioka and K. Kitamoto, *FEMS Microbiol. Lett.*, **2004**, 79–85.
10. K. A. K. Pahirulzaman, K. Williams and C. M. Lazarus - *Meth. Enzymol.*, **2012**, 241-260.
11. S. Yuan, L. Chen, Q. Wu, M. Jiang, H. Guo, Z. Hu, S. Chen, L. Liu and Z. Gao, *Mar. Drugs*, **2022**, 20(5), 294.
12. A. Macabeo, A. G. Patrick, A. C. Jean, L. E. Agustin and K. M. Yasmin, *Phytochem. Lett.*, **2020**, 147-151.
13. H. Fujimoto, M Sumino, J Nagano, H Natori, E, Okuyama and M Yamazaki, *Chem. Pharm. Bull.*, **1999**, 71-76.
